# Supplementary material for: Hospital Survey on Patient Safety Culture: psychometric evaluation in Kuwaiti public healthcare settings
Source: PubMed Central journal article supplement — BMJ Open. 2019 May 30;9(5):e028666. doi: 10.1136/bmjopen-2018-028666 (PMC6549604; doi:10.1136/bmjopen-2018-028666), 2019-05-30
Supplement: bmjopen-2018-028666.draft_revisions.pdf [file bmjopen-2018-028666.draft_revisions.pdf]

# BMJ Open

BMJ Open is committed to open peer review. As part of this commitment we make the peer review history of every article we publish publicly available.

When an article is published we post the peer reviewers' comments and the authors' responses online. We also post the versions of the paper that were used during peer review. These are the versions that the peer review comments apply to.

The versions of the paper that follow are the versions that were submitted during the peer review process. They are not the versions of record or the final published versions. They should not be cited or distributed as the published version of this manuscript.

BMJ Open is an open access journal and the full, final, typeset and author-corrected version of record of the manuscript is available on our site with no access controls, subscription charges or pay-per-view fees (<http://bmjopen.bmj.com>).

If you have any questions on BMJ Open's open peer review process please email [info.bmjopen@bmj.com](mailto:info.bmjopen@bmj.com)

# BMJ Open

## Psychometric Evaluation of the Hospital Survey on Patient Safety Culture in Kuwaiti Healthcare

|                               |                                                                                                                                                                                                                                             |
|-------------------------------|---------------------------------------------------------------------------------------------------------------------------------------------------------------------------------------------------------------------------------------------|
| Journal:                      | <i>BMJ Open</i>                                                                                                                                                                                                                             |
| Manuscript ID                 | bmjopen-2018-028666                                                                                                                                                                                                                         |
| Article Type:                 | Research                                                                                                                                                                                                                                    |
| Date Submitted by the Author: | 18-Dec-2018                                                                                                                                                                                                                                 |
| Complete List of Authors:     | Alsalem, Gheed; University of Glasgow, institute of health and wellbeing; Ministry of health, Quality and Accreditation Directorate<br>Bowie, Paul; NHS Scotland,<br>Morrison, Jill; University of Glasgow, General Practice & Primary Care |
| Keywords:                     | patient safety, safety culture, psychometrics, surveys, quality improvement                                                                                                                                                                 |
|                               |                                                                                                                                                                                                                                             |

SCHOLARONE™  
Manuscripts

# Psychometric Evaluation of the Hospital Survey on Patient Safety Culture in Kuwaiti Healthcare

Gheed Al Salem<sup>1</sup>, Paul Bowie<sup>2</sup>, Jill Morrison<sup>3</sup>

1. PhD Student, Institute of Health and Wellbeing, University of Glasgow, UK / Ministry of Health, Kuwait
2. Programme Director NHS Education for Scotland, Glasgow, UK / Hon Associate Professor, Institute of Health and Wellbeing, University of Glasgow, Glasgow, UK
3. Professor of General Practice, Institute of Health and Wellbeing, University of Glasgow, Glasgow, UK

## <sup>1</sup>CORRESPONDING AUTHOR

Institute of Health and Wellbeing,  
General Practice and Primary Care,  
University of Glasgow, 1, Horselethill Road, Glasgow, G12 9LX  
United Kingdom  
Tel: +44(0)141 330 8348  
Fax: +44 (0)141 330 8331  
Email: [g.alsalem.1@research.gla.ac.uk](mailto:g.alsalem.1@research.gla.ac.uk)

<sup>2</sup>NHS Education for Scotland, Glasgow, Scotland, UK  
2 Central Quay, 89 Hydepark Street, Glasgow, G3 8BW  
Tel: +44(0)141 223 1400/1401  
Fax: +44(0)141 223 1403  
Email: [paul.bowie@nes.scot.nhs.uk](mailto:paul.bowie@nes.scot.nhs.uk)

<sup>3</sup>Clerk of Senate and Vice Principal  
Senate Office  
University of Glasgow  
Level 5, Main Building  
Tel: +44(0)141 330 8744  
Email: [Jill.Morrison@glasgow.ac.uk](mailto:Jill.Morrison@glasgow.ac.uk)

Word count: 3998

## ABSTRACT

### Objective

As healthcare organisations endeavor to improve the quality and safety of their services, there is increasing recognition of the importance of building a culture of safety to promote patient safety and improve the outcomes of patient care. Surveys of safety culture/climate have not knowingly been conducted in Kuwait public hospitals, nor are valid or reliable survey instruments available for this context. This study aims to investigate the psychometric properties of the HSOPSC (Hospital Survey of Patient Safety Culture) tool in Kuwait public hospitals in addition to constructing an optimal model to assess the level of safety climate in this setting.

### Design

cross-sectional study.

### Setting

Three public hospitals in Kuwait.

### Participants

About 1,317 healthcare professionals.

### Main outcome measure

An adapted and contextualised version of HSOPSC was used to conduct psychometric evaluation including exploratory factor analysis, confirmatory factor analysis reliability and correlation analysis.

### Results

1,317 questionnaires (87%) were returned. Psychometric evaluation, showed an optimal model of Eight factors and 22 safety climate items. All items have strong factor loadings (0.42-0.86) and are theoretically related. Reliability analysis showed satisfactory results ( $\alpha > 0.60$ ).

## Conclusions

This is the first validation study of a standardised safety climate measure in a Kuwaiti healthcare setting. An optimal model for assessing patient safety climate was produced that mirrors other international studies and which can be used for measuring the prevailing safety climate. More importance should be attached to the psychometric fidelity of safety climate questionnaires before extending their use in other healthcare culture and contexts internationally.

**KEYWORDS:** patient safety, safety culture, psychometrics, surveys, quality improvement.

### STRENGTHS AND LIMITATIONS OF THIS STUDY:

- A rigorous and scientific psychometric approach was designed and executed based on recommended reporting practices with strengths of both EFA and CFA analytical techniques were used to test the original HSOPSC model and construct an optimal model.
- The large sample size (n=1280) allowed for the dataset to be split and for factor analysis to be undertaken with acceptable model fit indices.
- One limitation is the number of items per factor in the optimal model. Three factors contained only two items per factor in the final Eight-factor model.
- Another limitation is the exclusion of partially answered questionnaires. As a result, a subset of the total sample, with all items answered, was used for the validation of the psychometric properties of the HSOPSC.
- Lack of reporting of explicit psychometric data in some important studies used in the comparative analyses was another challenge faced in our study.

## INTRODUCTION

Modern healthcare systems are concerned with improving the safety of patient care and attempting to build a strong organisational safety cultures. “Safety Culture” is identified as a key element of a healthcare organisation’s ability to learn openly from safety incidents and reduce preventable harm to patients. The perceived importance of safety culture in improving patient safety and its impact on clinical outcomes has led to a growing interest in the assessment of safety culture in healthcare organisations. The use of survey questionnaires is one of the most popular methods for assessing safety culture. These surveys aim to measure healthcare workers' perceptions of the prevailing safety culture or “safety climate” in their organisations.

There are numerous definitions of safety culture and safety climate. Despite their distinctive terminologies, they are commonly used arbitrarily and interchangeably in the literature <sup>1</sup>. Safety culture has been described as a set of shared values, beliefs, norms, and attitudes that interact with an organisation’s structure and control systems resulting in behavioural norms <sup>2 3</sup>. Safety climate provides a “snapshot” of the perceptions held by healthcare workers about visible, surface level features of safety culture at a given point in time <sup>4</sup>. It “*assesses workforce perceptions of procedures and behaviours in their work environment that indicate the priority given to safety relative to other organisational goals*” <sup>5</sup>.

Assessing the status of the existing safety culture in a healthcare organisation is promoted as the first step for developing a strong and solid safety culture <sup>6</sup>. The resulting data potentially offers policymakers, healthcare providers, teams and managers a clear view of areas in need of attention to strengthen the prevailing safety climate, in addition to identifying specific challenges that impede progress in safety initiatives <sup>7</sup>. It can also be used for benchmarking and improving safety culture measures across time and between organisations on national and international levels <sup>8 9</sup>.

A range of safety climate assessment tools have been developed for acute hospital settings, although the scientific rigour with which they were designed and tested is variable <sup>5 10 11</sup>.

Multiple reviews of patient safety climate instruments have been published <sup>5 10-16</sup>. Most concluded that the Safety Attitudes Questionnaire (SAQ) and Hospital Survey on Patient Safety Culture

1  
2  
3 (HSOPSC) were the most appropriate tools available in terms of their psychometric properties, but  
4 also critiqued climate tools generally as many lack appropriate scale development, validation and  
5 evidence for their predictive validity. Over a decade ago, Flin, et al. <sup>5</sup> argued that it is essential  
6 that tools are developed with robust psychometric properties to enable valid interpretations of  
7 patient safety climate test scores to be made.  
8  
9  
10  
11  
12

13  
14 Despite this, many published studies are still limited in their reporting of the necessary  
15 psychometric properties of questionnaires <sup>5 10 17 18</sup>. It is argued that HSOPSC is one of the most  
16 rigorously tested instruments with good psychometric properties in addition to being tested on the  
17 necessary large sample sizes <sup>5</sup>. Psychometric analysis involves the use of established statistical  
18 assessment techniques to assess the psychometric properties of questionnaires and identify the  
19 underlying safety culture dimensions <sup>11</sup>.  
20  
21  
22  
23  
24  
25

26 Repeated high-profile media coverage has drawn the attention of Kuwaiti politicians and the public  
27 to failings in healthcare delivery and patient safety, which has contributed to growing demands for  
28 a better quality of care <sup>19-21</sup>. Subsequent inquiries and reports have placed patient safety high on  
29 the Kuwait policy agenda. The Ministry of Health (MOH) responded by investing significantly in  
30 the improvement of healthcare services. Safety climate assessment is one of the latest approaches  
31 to be adopted by the MOH with the goal of evaluating and improving patient safety in Kuwaiti  
32 hospitals.  
33  
34  
35  
36  
37  
38  
39

40 Surveys of safety climate have yet to be conducted at public hospitals in the state of Kuwait, nor  
41 are valid or reliable survey instruments available for this purpose. This study aims, therefore, to  
42 assess the psychometric properties of the HSOPSC tool in Kuwaiti public hospitals in addition to  
43 constructing an optimal model to assess the level of safety climate in this setting and to benchmark  
44 the data against other international studies.  
45  
46  
47  
48  
49  
50  
51  
52  
53  
54  
55  
56  
57  
58  
59  
60



## METHOD

### Instrument selection

HSOPSC is a 12-factor, 42 item survey questionnaire. It assesses ten climate dimensions of patient safety, with two outcome measures (overall perceptions of patient safety and frequency of event reporting). Two additional single-item outcome measure are included<sup>22 23</sup>. The HSOPSC tool was chosen for this study for several reasons. Firstly, a systematic review of tools designed for acute hospital settings concluded that HSOPSC had good overall methodological quality with good assessment of the tool's reported psychometric properties (Alsalem et al 2018). Secondly, HSOPSC was one of the most rigorously tested instruments at the time of selection, with extensive literature reporting its psychometric properties<sup>5</sup>. The tool has been extensively used in hospitals in the United States where it was originally developed<sup>24</sup>, and validated for use in more than 60 countries and translated into 30 different languages<sup>25-32</sup>. Thirdly, HSOPSC is a comprehensive measure of safety climate as it assesses key aspects related to patient safety at multiple levels of analysis including the individual, unit and hospital levels (Box 1). Finally, the tool is freely available, uses clear language with a scale that is simple and easy to follow.

### Instrument modification

The tool was pilot tested and modified for Kuwaiti healthcare in order to solve any technical and feasibility issues associated with its application<sup>33 34</sup>. Seven face-to-face interviews were conducted with a panel of healthcare staff from MOH (including doctors, nurses and risk and safety officers) to evaluate HSOPSC content and ensure the proper transfer of the intended meaning of the questionnaire items to the culture and language differences in the Kuwait context. The panel endorsed the HSOPSC content as being of high relevance to safety culture in Kuwaiti hospitals. All items were retained. However, wording was modified in eight items to clarify their meaning as some comments indicated potential ambiguity in items' interpretations.

### Instrument testing

A stratified random sample was drawn from healthcare clinical staff in three public hospitals in Kuwait. To ensure that the sample size was adequate to satisfactorily undertake factor analysis (FA), sample size requirements (sample size of the study, ratio of the sample size to the number

1  
2  
3 of variables, ratio of the number of variables to the number of factors) were evaluated <sup>35</sup>.  
4  
5 Tabachnick and Fidell <sup>36</sup> rule recommends having at least 300 cases to undertake FA. The Kaiser-  
6  
7 Meyer-Olkin (KMO) coefficient was used as another measure of sampling adequacy. KMO  
8  
9 coefficient values range between 0 and 1. Surveys of health professionals can be challenging and  
10  
11 are characterised by declining response rates <sup>37</sup> with a significant downward trend in response rates  
12  
13 from 1998 to 2008 <sup>38</sup>. Based on their findings, the predicted response rate for this study was 20%  
14  
15 and it was estimated that the sample size should be a minimum of 1,500 of distributed  
16  
17 questionnaires.

### 18 19 **Data collection and management**

20  
21 Staff members were invited by letter to participate in the study. Questionnaires were distributed  
22  
23 across different departments in the three public hospitals. The questionnaires were completed  
24  
25 anonymously and returned to multiple collection boxes located within the hospitals. Data were  
26  
27 coded and entered into an electronic data file using the Statistical Package for Social Science  
28  
29 (SPSS 24). Negatively worded items were reverse coded. If less than one entire section of the  
30  
31 survey was answered or less than half of the items throughout the entire survey (in different  
32  
33 sections) were answered, or if every item was answered the same, these questionnaires were  
34  
35 excluded <sup>39</sup>. Missing values were deleted in a listwise manner in order to minimise any possible  
36  
37 biases <sup>40</sup>.

### 38 39 **Factor analysis (FA)**

40  
41 FA is a statistical method that “*explores the extent to which individual items in a questionnaire*  
42  
43 *can be grouped together according to the correlations between the responses to them*”, thus  
44  
45 reducing the dimensionality of the data <sup>41</sup>. It can be applied as a data reduction or a structure  
46  
47 detection method <sup>42</sup>. The two main techniques of FA are Exploratory Factor Analysis (EFA), and  
48  
49 Confirmatory Factor Analysis (CFA), which are both recommended to test construct validity <sup>43</sup>.

50  
51 EFA allows the researcher to uncover the main dimensions to develop a theory, or model from a  
52  
53 smaller number of latent constructs that are often represented by a larger set of measured variables  
54  
55 <sup>44 45</sup>. CFA tests a pre-determined factor structure or a proposed theory <sup>44 45</sup>. This study combined  
56  
57 both approaches to develop an optimal model, based on the original HSOPSC model, for  
58  
59

1  
2  
3 specifically assessing patient safety climate in Kuwaiti public hospitals. Due to the controversy  
4 associated with conducting EFA and CFA on the same data, a split-half validation technique is  
5 recommended<sup>46 47</sup>. Therefore, the Kuwaiti dataset was randomly split into two independent  
6 datasets using SPSS 24. Each group contains a set of 640 (n=640) cases - the calibration half of  
7 the dataset was used for model construction and the validation half of the dataset was used for  
8 confirming the explored factor structure resulting from model construction.  
9  
10  
11  
12  
13  
14

15 Data analysis was based on three main phases. 1. To investigate whether the original HSOPSC 12-  
16 factor model is appropriate for the Kuwaiti data. Both CFA and reliability analysis were used at  
17 this step. 2. To examine whether an alternative factor model would fit the Kuwaiti data better. For  
18 model construction, EFA was carried out using the calibration half of the dataset (Sample A,  
19 n=640). 3. Undertaking CFA and reliability analysis using the validation half of the dataset, to test  
20 the fit of the resultant model from the previous phase (Sample B, n=640). Cronbach's alpha ( $\alpha$ )  
21 was calculated for each factor to examine the internal consistency or reliability with the minimum  
22 criterion for acceptable reliability of at least  $\alpha \geq 0.60$  as recommended for the majority of research  
23 purposes<sup>48 49</sup>. Factor correlations of the optimal model were performed in addition to comparisons  
24 between the CFA output of our optimal factor model and the outputs reported in previous studies.  
25  
26  
27  
28  
29  
30  
31  
32  
33

## 34 RESULTS

### 35 36 37 Response rate and sample demographics

38 Of the 1,511 questionnaires distributed at the three hospitals, 1,317 questionnaires (87%) were  
39 returned. A KMO statistic of 0.88 was calculated, which indicates that the sample has a sufficient  
40 level of homogeneity<sup>50 51</sup>. Thirty-seven questionnaires were excluded. Appendix 1 summarizes  
41 the relevant demographics of survey respondents.  
42  
43  
44  
45  
46  
47

### 48 Instrument testing

#### 49 Testing the original HSOPSC (12-factor) model

50 A CFA was performed, using AMOS software<sup>52</sup>, to test the model fit of the original HSOPSC 12-  
51 factor structure using the Kuwaiti data. The global fit of our model was not consistently satisfactory  
52 for the Kuwaiti data. Three criteria measures did not indicate an acceptable fit with Comparative  
53  
54  
55  
56  
57  
58  
59  
60

1  
2  
3  
4  
5  
6  
7  
8  
9  
10  
11  
12  
13  
14  
15  
16  
17  
18  
19  
20  
21  
22  
23  
24  
25  
26  
27  
28  
29  
30  
31  
32  
33  
34  
35  
36  
37  
38  
39  
40  
41  
42  
43  
44  
45  
46  
47  
48  
49  
50  
51  
52  
53  
54  
55  
56  
57  
58  
59  
60

Fit Index (CFI) = 0.81 (CFI values  $\geq 0.90$  considered a good model fit <sup>53</sup>), Chi-squared statistic per one degree of freedom ( $\chi^2/DF$ ) = 4.81 ( $\chi^2/DF$  value  $\leq 2$  for a good fit <sup>54</sup>), and TLI = 0.784 (TLI of  $> 0.90$  indicates a good fit <sup>53</sup>) values indicate that the fit is not adequately good enough to confirm the proposed factor structure.

The internal consistency of the Kuwaiti data (n=1280) was  $\geq 0.60$  within nine dimensions. Three dimensions had internal consistencies less than 0.60. Additionally, two dimensions have a questionable internal consistency because their Cronbach's alpha value was 0.60 (Cronbach's  $\alpha=0.604$  for "Non-punitive Response to Errors" and Cronbach's  $\alpha=0.601$  for "communication openness". In summary, the results of the CFA and reliability analysis indicate that the original HSOPSC 12 Factor model is not a satisfactory fit when it is used for the Kuwaiti data. Therefore, an EFA was used for investigating an alternative factor structure which might be more appropriate for Kuwaiti data.

### Construction of an optimal model

EFA consists of two basic stages. 1. Estimating the number of factors that should be extracted to represent the HSOPSC factor structure; and 2. Interpreting the meaning of the extracted factors and representing them in terms of theoretical structures that reflect the patient safety climate dimensions. EFA (principal axis factoring with varimax then oblique rotation) was performed on the calibration half of the dataset (n=640). Based on the Kaiser criterion of Eigenvalues greater than one (Eigenvalues  $> 1$ ) <sup>50</sup> and Cattell scree plot <sup>55</sup>, different numbers of factors (12,11,10,9,8,7 factors) were extracted and investigated to find the optimal alternative model.

Following the rotation of factors the factor pattern matrix was examined to decide on the acceptable level of loading for variables to define factors <sup>56</sup>. To reach a satisfactory solution, a number of points need to be taken into consideration including identifying items with low communalities, no or low loading, items with cross loadings and the theoretical structure of items. It should be noted that the decision on how many factors to retain based on the degree of comprehensibility and interpretability of the factor structure in the context of the research <sup>57</sup>. In addition, theoretical knowledge regarding the construct under study is more significant than a

1  
2  
3 statistical measure and the items and factors should make conceptual sense and be theoretically  
4 related <sup>56</sup>.  
5  
6  
7

8  
9 **Final factor solution**

10 An Eight-factor solution (all loadings  $\geq 0.40$ ) showed the best model fit to the Kuwaiti dataset.  
11 The Scree plot of the final EFA solution is shown in Figure 1. The structure and factor loadings  
12 of the final EFA solution are reported in Table 1. The final solution explains 50.2% of variance  
13 by eight extracted factors and represents 22 items from the safety climate questionnaire (20 items  
14 were excluded). All factor loadings are within the range of 0.428-0.864.  
15  
16  
17  
18  
19  
20

21 **Table 1: Pattern matrix of the final EFA solution (Eight factors, 22 items)**

| Variable                                                                                                                         | Factor |      |       |      |   |   |   |   |
|----------------------------------------------------------------------------------------------------------------------------------|--------|------|-------|------|---|---|---|---|
|                                                                                                                                  | 1      | 2    | 3     | 4    | 5 | 6 | 7 | 8 |
| (B1) My supervisor/manager says a good word when he/she sees a job done according to established patient safety procedures (SEA) | ,822   |      |       |      |   |   |   |   |
| (B2) My supervisor/manager seriously considers staff suggestions for improving patient safety (SEA)                              | ,623   |      |       |      |   |   |   |   |
| (E2) When a mistake is made, but has no potential to harm the patient, how often is this reported? (FER)                         |        | ,864 |       |      |   |   |   |   |
| (E1) When a mistake is made, but is caught and corrected before affecting the patient, how often is this reported? (FER)         |        | ,776 |       |      |   |   |   |   |
| (E3) When a mistake is made that could harm the patient, but does not, how often is this reported? (FER)                         |        | ,776 |       |      |   |   |   |   |
| (D5) Important patient care information is often lost during shift changes. (negatively worded) (HO)                             |        |      | -,662 |      |   |   |   |   |
| (D3) Things 'fall between the cracks' when transferring patients from one unit to another (negatively worded) (HO)               |        |      | -,621 |      |   |   |   |   |
| (D6) It is often unpleasant to work with staff from other hospital units. (negatively worded) (TWAU)                             |        |      | -,495 |      |   |   |   |   |
| (D7) Problems often occur in the exchange of information across hospital units. (negatively worded) (HO)                         |        |      | -,428 |      |   |   |   |   |
| (A16) Staff worry that mistakes they make are kept in their personnel file. (negatively worded) (NRP)                            |        |      |       | ,578 |   |   |   |   |
| (A8) Staff feel like their mistakes are held (used) against them. (negatively worded) (NPR)                                      |        |      |       | ,559 |   |   |   |   |
| (A12) When an incident is reported, it feels like the person is being reported, not the problem. (negatively worded) (NPR)       |        |      |       | ,531 |   |   |   |   |

| Variable                                                                                                 | Factor |   |   |   |       |      |      |      |
|----------------------------------------------------------------------------------------------------------|--------|---|---|---|-------|------|------|------|
|                                                                                                          | 1      | 2 | 3 | 4 | 5     | 6    | 7    | 8    |
| (D4) There is good cooperation among hospital units that need to work together (TWAU)                    |        |   |   |   | -,641 |      |      |      |
| (D2) Hospital units do not coordinate well with each other. (negatively worded) (TWAU)                   |        |   |   |   | -,522 |      |      |      |
| (A1) People support one another in this unit (TWWU)                                                      |        |   |   |   |       | ,688 |      |      |
| (A3) When a lot of work needs to be done quickly, we work together as a team to get the work done (TWWU) |        |   |   |   |       | ,605 |      |      |
| (A4) In this unit, people treat each other with respect (TWWU)                                           |        |   |   |   |       | ,556 |      |      |
| (C6) Staff are afraid to ask questions when something does not seem right. (negatively worded) (CO)      |        |   |   |   |       |      | ,615 |      |
| (C4) Staff feel free to question the decisions or actions of those with more authority (CO)              |        |   |   |   |       |      | ,600 |      |
| (C2) Staff will freely speak up if they see something that may negatively affect patient care (CO)       |        |   |   |   |       |      | ,524 |      |
| (D1) Hospital management provides a work climate that promotes patient safety (MS)                       |        |   |   |   |       |      |      | ,677 |
| (D8) The actions of hospital management show that patient safety is a top priority (MS)                  |        |   |   |   |       |      |      | ,574 |

Extraction Method: Principal Axis Factoring. Rotation Method: Oblimin with Kaiser Normalization.

Rotation converged in 16 iterations. Supervisor/manager expectations and actions promoting safety (SMEA), Organisational learning—continuous improvement (OL), Teamwork within hospital units (TWWU), Teamwork across hospital units (TWAU), Communication openness (CO), Feedback and communication about error (FB), Non-punitive response to error (NPRE), Staffing (S), Hospital management support for patient safety (MS), Hospital handoffs and transitions (HO), Frequency of incident reporting (FER), Overall perceptions of patient safety (OPPS).

Five factors (Factor 2, Factor 3, Factor 4, Factor 6, and Factor 7) have three and more items with loading  $>0.4$ . Factor 1, Factor 5, and Factor 8 have two items with very high loading of  $>0.5$  and the items in each factor are theoretically related (Table 2). There are no cross loaded items and there are no items with loading  $<0.4$  and with communalities  $<0.3$  in the solution. The solution is essentially consistent with all items within each factor theoretically related. Only D6 moved from "Teamwork across units" to "Handoffs and transitions."

**Table 2: Structure, factors loadings and internal consistency of the final EFA solution (Eight factors, 22 items)**

| Number of Factor | Factor                                                       | Heavy loaded items ( $>0.4$ ) | Number of items | Cronbach's Alpha |
|------------------|--------------------------------------------------------------|-------------------------------|-----------------|------------------|
| 1                | Supervisor/Manager Expectations and Actions Promoting Safety | B1-B2                         | 2               | 0.776            |
| 2                | Frequency of Events Reported                                 | E1-E2-E3                      | 3               | 0.858            |

| Number of Factor | Factor                                | Heavy loaded items (>0.4) | Number of items | Cronbach's Alpha |
|------------------|---------------------------------------|---------------------------|-----------------|------------------|
| 3                | Handoffs and Transitions              | D3-D5-D6-D7               | 4               | 0.685            |
| 4                | Non-punitive Response to Errors       | A8-A12-A16                | 3               | 0.604            |
| 5                | Teamwork Across Units                 | D2-D4                     | 2               | 0.689            |
| 6                | Teamwork Within Units                 | A1-A3-A4                  | 3               | 0.705            |
| 7                | Communication Openness                | C2-C4-C6                  | 3               | 0.601            |
| 8                | Management Support for Patient Safety | D1-D8                     | 2               | 0.724            |

Testing the final factor (Eight-factor) model

The optimal Eight-factor model was vigorously examined by conducting two confirmatory analyses initially using the validation half of the dataset (n=640), followed by the whole dataset (n=1280). All estimated parameters indicate a good model fit (Eight factors and 22 items) as reported in Table 3.

**Table 3: CFA Results of Eight factor optimal model (validation sample and whole sample)**

| Eight-factors model | Chi-Square statistic ( $\chi^2$ ) | DF          | CMIN/DF ( $\chi^2/DF$ ) | CFI           | RMR           | SRMR          | RMSEA         | TLI           |
|---------------------|-----------------------------------|-------------|-------------------------|---------------|---------------|---------------|---------------|---------------|
| Validation sample   | 424.9<br>good                     | 181<br>good | 2.3<br>acceptable       | 0.94<br>good  | 0.049<br>good | 0.048<br>good | 0.046<br>good | 0.92<br>good  |
| Whole sample        | 617.8<br>good                     | 181<br>good | 3.4<br>acceptable       | 0.946<br>good | 0.041<br>good | 0.038<br>good | 0.043<br>good | 0.931<br>good |

Chi-square test statistic ( $\chi^2$ ), Chi-squared statistic per one freedom degree ( $\chi^2/DF$ ), the Comparative Fit Index (CFI), Root mean square residuals (RMR), the Standardised Root Mean Square Residual (SRMR), the Root Mean Square Error of Approximation (RMSEA), Tucker-Lewis Index (TLI)

The standardised path coefficients reflecting the strength of the relationship between items and dimensions<sup>58</sup> were found to be generally large (>0.50) and ranged from 0.46 (Communication openness) to 0.89 (Frequency of incidents reported) (see Appendix 2). Therefore, this model was accepted as the optimal model of HSOPSC for the Kuwaiti healthcare setting.



## Reliability

Reliability analysis was performed using the whole sample with Cronbach's Alpha values reported to be  $\geq 0.60$  for all factors. Therefore, the internal consistency was acceptable for the Eight factors solution (Table 2). In order to test the construct validity of the HSOPSC instrument, inter-correlation coefficients with Pearson's  $r$  were calculated between the Eight factors in addition to the two single item outcome measures (patient safety grade and number of incidents reported).

The Pearson's correlation coefficients between scale scores are reported in online appendix 3.

Inter-correlation coefficients ranged between 0.08 and 0.72. All correlation coefficients are significant. The highest correlations were those between "Management support for patient safety" and "Teamwork across units" ( $r=0.722$ ). All eight factors are interrelated to each other. Most of the correlation coefficients indicate a moderate correlation between dimensions. This indicates that no two factors are measuring the same construct.

## Proposed optimal Eight factors model for Kuwaiti data

As shown in Table 4, the proposed optimal model structure includes 8 dimensions and 22 items.

**Table 4: Proposed Eight factors optimal model for Kuwaiti data**

|                                                                                                                           |
|---------------------------------------------------------------------------------------------------------------------------|
| <b>Factor 1: Supervisor/Manager Expectations and Actions Promoting Patient Safety (2 items)</b>                           |
| B1: My supervisor/manager says a good word when he/she sees a job done according to established patient safety procedures |
| B2: My supervisor/manager seriously considers staff suggestions for improving patient safety.                             |
| <b>Factor 2: Frequency of Events Reported (3 items)</b>                                                                   |
| E1: When a mistake is made, but is caught and corrected before affecting the patient, how often is this reported?         |
| E2: When a mistake is made, but has no potential to harm the patient, how often is this reported?                         |
| E3: When a mistake is made that could harm the patient, but does not, how often is this reported?                         |
| <b>Factor 3: Handoffs and Transitions (4 items)</b>                                                                       |
| D3: Things "fall between the cracks" when transferring patients from one unit to another. (negatively worded)             |
| D5: Important patient care information is often lost during shift changes. (negatively worded)                            |
| D6: It is often unpleasant to work with staff from other hospital units. (negatively worded)                              |
| D7: Problems often occur in the exchange of information across hospital units. (negatively worded)                        |
| <b>Factor 4: Non-punitive Response to Errors (3 items)</b>                                                                |
| A8: Staff feel like their mistakes are held (used) against them. (negatively worded)                                      |
| A12: When an incident is reported, it feels like the person is being reported, not the problem. (negatively worded)       |
| A16: Staff worry that mistakes they make are kept in their personnel file. (negatively worded)                            |



|                                                                                                   |
|---------------------------------------------------------------------------------------------------|
| <b>Factor 5: Teamwork Across Units (2 items)</b>                                                  |
| D2: Hospital units do not coordinate well with each other. (negatively worded)                    |
| D4: There is good cooperation among hospital units that need to work together.                    |
| <b>Factor 6: Teamwork Within Units (3 items)</b>                                                  |
| A1: People support one another in this unit.                                                      |
| A3: When a lot of work needs to be done quickly, we work together as a team to get the work done. |
| A4: In this unit, people treat each other with respect.                                           |
| <b>Factor 7: Communication Openness (3 items)</b>                                                 |
| C2: Staff will freely speak up if they see something that may negatively affect patient care.     |
| C4: Staff feel free to question the decisions or actions of those with more authority.            |
| C6: Staff are afraid to ask questions when something does not seem right. (negatively worded)     |
| <b>Factor 8: Management Support for Patient Safety (2 items)</b>                                  |
| D1: Hospital management provides a work climate that promotes patient safety.                     |
| D8: The actions of hospital management show that patient safety is a top priority.                |

## DISCUSSION

This psychometric evaluation is the first reported validation study of a standardised safety climate measure in a Kuwaiti healthcare setting. The psychometric properties of the HSOPSC questionnaire were assessed and an optimal model for assessing patient safety climate in Kuwaiti hospitals was constructed. The final questionnaire contains 22 safety climate items (variables) that measure eight safety climate factors. The optimal model's psychometric properties (including validity and reliability) were good with all items loading strongly ( $>0.40$ ) onto one factor and all items, within each factor, were theoretically related.

Our results are in line with other studies investigating the psychometric properties of the original HSOPSC questionnaire. The suitability of the original HSOPSC model for Kuwaiti data was tested and results revealed an unsatisfactory fit<sup>59</sup>. Different international studies<sup>27 31 60 61</sup> reported similar findings. This finding is in contrast with other studies that assessed patient safety climate by using the original HSOPSC questionnaire<sup>59</sup> in hospitals without examining the reliability and validity of the questionnaire in a different context<sup>62-68</sup>

Various underlying factor structures were identified as optimal factor models. The original 12 factor model was replicated in Belgian<sup>6</sup>, Portuguese<sup>69</sup> and Scottish data<sup>70</sup>. Other studies reported 11 factor models for Dutch<sup>30</sup>, Arabic<sup>61</sup>, Croatian<sup>71</sup> and Norwegian data<sup>72</sup>; 10 factor models for French<sup>28</sup>, Turkish<sup>26</sup>, Chinese<sup>73</sup> and Brazilian data<sup>74</sup>; 9 factor models for UK<sup>31</sup> and Slovene data

1  
2  
3  
4  
5  
6  
7  
8  
9  
10  
11  
12  
13  
14  
15  
16  
17  
18  
19  
20  
21  
22  
23  
24  
25  
26  
27  
28  
29  
30  
31  
32  
33  
34  
35  
36  
37  
38  
39  
40  
41  
42  
43  
44  
45  
46  
47  
48  
49  
50  
51  
52  
53  
54  
55  
56  
57  
58  
59  
60

<sup>75</sup>; Eight factor models for Swiss <sup>27</sup>, Saudi <sup>60</sup>, Kosovo <sup>76</sup> and Kuwaiti data. This discrepancy in results could be attributed to differences in employing survey methods and psychometric analytical techniques, in addition to the various modifications made to adapt the original instrument to different healthcare settings <sup>70</sup>. Neglect of crucial elements, including context, processes and actors involved, when attempting to adapt an instrument in a different setting might lead to conflicting results and might weaken the validity of the instrument <sup>77</sup>. Thus, the original HSOPSC will clearly be limited when used in other contexts without proper assessment of its psychometric properties. The optimal model of our study is in line with other international studies <sup>31 60</sup>. Four dimensions were either dropped or merged with other factors into a single dimension. In our study, the same dimensions reported low reliability using the original HSOPSC in addition to other international studies <sup>31 60 78</sup>. The optimal model was confirmed using CFA with good model fit indices. This was consistent with the CFA results of the USA <sup>59</sup>, Saudi Arabia <sup>60</sup>, Palestine <sup>61</sup>, UK <sup>31</sup> and Scotland <sup>70</sup> optimal models.

Considering all of this evidence, it seems that the original HSOPSC questionnaire <sup>59</sup> does not appear to perform well in different countries. Survey instruments that are designed for particular settings are tailored to meet the unique characteristics and contexts of the local setting and population. In the case of the HSOPSC, a number of the reported adaptations have performed less well than the original tool <sup>28 31 72 73 79</sup>.

In a review of quantitative patient safety culture instruments, it was concluded that all of the surveys designed for general administration to hospital personnel addressed three common dimensions: management support and commitment to safety, communication openness and teamwork <sup>11</sup>. They suggested that these common dimensions might be considered “core dimensions” of patient safety culture. In addition, a number of dimensions seem to be common among optimal factor models across different countries.

Factor structure of the optimal model of our study compared with optimal models that were developed in Saudi Arabia, Palestine, England, Scotland, Netherlands, Turkey and Switzerland in addition to the original USA HSOPSC questionnaire <sup>59</sup> is shown in Online Appendix 4. This

1  
2  
3 comparison is aimed at identifying a common set of patient safety culture dimensions across  
4 different countries.  
5  
6  
7

8 Six studies reported different dimensions combined into one dimension. A significant degree of  
9 overlap in the content of the safety culture dimensions exists. As a result, included items in certain  
10 dimensions tend to load onto differently labeled dimensions. “Feedback and communication about  
11 error” and “Communication openness” were grouped into one dimension in the Palestinian, Swiss  
12 and Scottish studies respectively <sup>27 61 78</sup>. This result is expected as both dimensions are closely  
13 related. Feedback and communication with staff about errors and discussing ways to prevent them  
14 are linked to allowing staff to freely speak up, if they see something that might negatively affect  
15 patient care.  
16  
17  
18  
19  
20  
21  
22  
23

24 Cox and Flin <sup>1</sup> suggest that the nature of safety climate is “context-dependent.” Keiser <sup>80</sup> argues  
25 that since safety climate measures include both general and contextualized items, excluding  
26 contextual measures might provide a rather deficient evaluation of the underlying safety climate  
27 construct. Thus, research currently supports the idea of integrating both qualitative and quantitative  
28 methods in developing a culturally appropriate instrument as standard approaches that exclusively  
29 rely on translation and quantitative validation may not be sufficient to produce an instrument that  
30 is applicable to the local context <sup>73</sup>. As a result, the adopted tool will be able to reflect important  
31 safety climate themes that are specific to the local healthcare context.  
32  
33  
34  
35  
36  
37  
38  
39

40 A number of common dimensions that were emerging rather consistently across international  
41 settings despite the lack of confirmation of the original factor structure of the HSOPSC in  
42 numerous studies. Those dimensions include: management support for patient safety, supervisors’  
43 action promoting patient safety, teamwork within and across units, handoffs and transitions, non-  
44 punitive response to error, frequency of incidents reported, communication openness and  
45 organisational learning.  
46  
47  
48  
49  
50

51 The item composition of each factor of the optimal model of our study was compared with optimal  
52 models that were developed in Saudi Arabia, Palestine, England, Netherlands, Turkey and  
53 Switzerland in addition to the original USA HSOPSC questionnaire <sup>59</sup>. This comparison is aimed  
54  
55  
56  
57  
58  
59  
60

1  
2  
3 at identifying a common set of patient safety climate items across different countries (Appendix  
4 5). The different adaptations of the HSOPSC did not confirm the original factor structure of the  
5 6 HSOPSC<sup>59</sup>. Still, some dimensions corresponded to the ones proposed in the original HSOPSC  
7 8 model and items were repeated across the different studies. It should be noted that not all studies  
9 10 reported their optimum factor model structure. As a result, this created a difficulty in identifying  
11 12 the structure of the common dimensions across different countries.  
13

## 14 15 **STRENGTHS AND LIMITATIONS**

16  
17 A rigorous and scientific psychometric approach was designed and executed based on  
18 19 recommended reporting practices. Strengths of both EFA and CFA analytical techniques were  
20 21 used to test the original HSOPSC model and construct an optimal model. The large sample size  
22 23 (n=1280) allowed for the dataset to be split and for factor analysis to be undertaken with acceptable  
24 25 model fit indices.  
26

27  
28 One limitation is the number of items per factor in the optimal model. Three factors contained only  
29 30 two items per factor in the final Eight-factor model. This is less than the recommended minimum  
31 32 of three items per factor. However, the items reported high loadings with a strong theoretical  
33 34 linkage. Similar findings have been reported in the literature<sup>31 60</sup>. Another limitation is the  
35 36 exclusion of partially answered questionnaires. As a result, a subset of the total sample, with all  
37 38 items answered, was used for the validation of the psychometric properties of the HSOPSC. Lack  
39 40 of reporting of explicit psychometric data in some important studies used in the comparative  
41 42 analyses was another challenge faced in our study.  
43

## 44 45 **CONCLUSION**

46  
47 This is the first validation study of a patient safety climate questionnaire conducted in a Kuwaiti  
48 49 healthcare setting. The results clearly indicate the need for caution when using the original version  
50 51 of the HSOPSC questionnaire<sup>59</sup> and highlight the importance of appropriate validation of safety  
52 53 climate surveys before applying them to different populations and healthcare contexts than those  
54 55 in which they were originally developed. The study also shows the original composition of the  
56 57 HSOPSC dimensions was not confirmed in most studies. When compared to the USA, the  
58 59 HSOPSC questionnaire may be assessing different dimensions of safety culture across different  
60

1  
2  
3 countries including Kuwait<sup>59</sup>. More work is needed on cross-cultural investigations of differences  
4 in dimensionality to allow comparisons of healthcare safety climate results at an international level  
5  
6  
7  
8  
9  
10  
11  
12  
13  
14  
15  
16  
17  
18  
19  
20  
21  
22  
23  
24  
25  
26  
27  
28  
29  
30  
31  
32  
33  
34  
35  
36  
37  
38  
39  
40  
41  
42  
43  
44  
45  
46  
47  
48  
49  
50  
51  
52  
53  
54  
55  
56  
57  
58  
59  
60

countries including Kuwait<sup>59</sup>. More work is needed on cross-cultural investigations of differences in dimensionality to allow comparisons of healthcare safety climate results at an international level<sup>27 41</sup>. This study provided comparative data on the use of the HSOPSC questionnaire internationally and nine common dimensions and items were identified when comparing the different studies that reported their optimum models. The optimal factor model that was constructed in this study can be used as a basis for measuring patient safety climate in Kuwaiti hospitals and in evaluating changes in safety climate over time as part of patient safety improvement initiatives.

**Acknowledgement:**

We would like to thank every MOH staff member who took time to participate in this project despite their workload and endless commitments in order to contribute to a safer healthcare.

**Funding:**

None.

**Competing interests:**

None.

**Authors' contributions:**

GA, PB and JM made considerable contributions to conception and design of the psychometric evaluation.

GA completed the psychometric assessment and development of the final eight-factor model.

GA was involved in drafting the manuscript while JM and PB have done revising the drafts.

All authors have given final approval of the version to be published and agreed to be accountable for all aspects of the work in ensuring that questions related to the accuracy or integrity of any part of the work are appropriately investigated and resolved.

All authors read and approved the final manuscript.

**Ethics approval:**

Ethical approval was sought from the Medical, Veterinary and Life Sciences College ethics committee of the University of Glasgow in Scotland and the Medical and Health Sciences Research Committee of the Ministry of Health in Kuwait.

**Provenance and peer review:**

Not commissioned; externally peer reviewed.

## REFERENCES

1. Cox S, Flin R. Safety culture: philosopher's stone or man of straw? *Work & stress* 1998;12(3):189-201.
2. Perrow C. A personal note on normal accidents. *Organization & environment* 2004;17(1):9-14.
3. Reason J. Combating omission errors through task analysis and good reminders. *Quality and Safety in Health Care* 2002;11(1):40-44.
4. Mearns KJ, Flin R. Assessing the state of organizational safety—culture or climate? *Current Psychology* 1999;18(1):5-17.
5. Flin R, Burns C, Mearns K, et al. Measuring safety climate in health care. *Qual Saf Health Care* 2006;15:109 - 15.
6. Hellings J, Schrooten W, Klazinga N, et al. Challenging patient safety culture: survey results. *International Journal of Health Care Quality Assurance* 2007;20(7):620-32.
7. Smits M, Groenewegen PP, Timmermans DRM, et al. The nature and causes of unintended events reported at ten emergency departments. *BMC Emergency Medicine* 2009;9:16.
8. Blegen MA, Gearhart S, O'Brien R, et al. AHRQ's hospital survey on patient safety culture: psychometric analyses. *Journal of Patient Safety* 2009;5(3):139-44.
9. Lee T, Harrison K. Assessing safety culture in nuclear power stations. *Safety science* 2000;34(1):61-97.
10. Colla J, Bracken A, Kinney L, et al. Measuring patient safety climate: a review of surveys. *Qual Saf Health Care* 2005;14:364 - 66.
11. Singla AK, Kitch BT, Weissman JS, et al. Assessing patient safety culture: a review and synthesis of the measurement tools. *Journal of Patient Safety* 2006;2(3):105-15.
12. Fleming M. Patient safety culture measurement and improvement: a “how to” guide. *Healthc Q* 2005;8(Spec No):14-19.
13. Jackson J, Sarac C, Flin R. Hospital safety climate surveys: measurement issues. *Current Opinion in Critical Care* 2010;16(6):632-8.
14. Halligan M, Zecevic A. Safety culture in healthcare: a review of concepts, dimensions, measures and progress. *BMJ quality & safety* 2011;20(4):338-43.
15. Pumar-Méndez MJ, Attree M, Wakefield A. Methodological aspects in the assessment of safety culture in the hospital setting: A review of the literature. *Nurse education today* 2014;34(2):162-70.
16. Sammer CE, Lykens K, Singh KP, et al. What is patient safety culture? A review of the literature. *Journal of Nursing Scholarship* 2010;42(2):156-65.
17. Flin R. Measuring safety culture in healthcare: A case for accurate diagnosis. *Safety Science* 2007;45:653-67.

18. Nieva VF, Sorra J. Safety culture assessment: a tool for improving patient safety in healthcare organizations. *Qual Saf Health Care* 2003;12 Suppl 2:ii17-23.
19. Alabdaly S. About the scandal of fatal errors in Adan Hospital. *Alaan Newspaper* 2009 11 January 2009.
20. Salama F. Medical errors kill a quarter of a million Americans a year. *Alqabas newspaper* 2016 5 May 2016.
21. Sami A. Medical errors, an obsession that worries everyone. *Aljarida newspaper* 2015 3 September 2015.
22. Sorra JS, Dyer N. Multilevel psychometric properties of the AHRQ hospital survey on patient safety culture. *BMC Health Services Research* 2010;10(1):199.
23. Sorra J, Nieva V. Hospital Survey on Patient Safety Culture. AHRQ Publication No. 04-0041. Rockville, MD: Agency for Healthcare Research and Quality, September 2004, 2007.
24. Sorra J, Famolaro T, Dyer MN, et al. Hospital Survey on Patient Safety Culture: 2010 User Comparative Database Report. Rockville, MD, 2010.
25. Measuring hospital safety culture: Testing the HSOPSC scale. Proceedings of the Human Factors and Ergonomics Society; 2010.
26. Bodur S, Filiz E. Validity and reliability of Turkish version of "hospital Survey on Patient Safety Culture" and perception of patient safety in public hospitals in Turkey. *BMC Health Services Research* 2010;10
27. Pfeiffer Y, Manser T. Development of the German version of the Hospital Survey on Patient Safety Culture: Dimensionality and psychometric properties. *Safety Science* 2010;48(10):1452-62.
28. Perneger TV, Staines A, Kundig F. Internal consistency, factor structure and construct validity of the French version of the Hospital Survey on Patient Safety Culture. *BMJ quality & safety* 2014;23(5):389-97.
29. Haugen AS, Sjøfteland E, Eide GE, et al. Patient safety in surgical environments: cross-countries comparison of psychometric properties and results of the Norwegian version of the Hospital Survey on Patient Safety. *BMC health services research* 2010;10(1):1.
30. Smits M, Christiaans-Dingelhoff I, Wagner C, et al. The psychometric properties of the 'Hospital Survey on Patient Safety Culture' in Dutch hospitals. *BMC Health Services Research* 2008;8:230.
31. Waterson P, Griffiths P, Stride C, et al. Psychometric properties of the Hospital Survey on Patient Safety Culture: findings from the UK. *Quality and Safety in Health Care* 2010;19(5):e2-e2.
32. Agency for Healthcare Research and Quality. International Use of the Surveys on Patient Safety Culture Rockville, MD2015 [Available from: <http://www.ahrq.gov/professionals/quality-patient-safety/patientsafetyculture/psscintusers.html> accessed 3 February 2016.



- 1
- 2
- 3
- 4 33. Gerrish K, Lacey A. The research process in nursing. Chichester: John Wiley & Sons 2010.
- 5
- 6 34. Sarantakos S. Social research: Palgrave Macmillan 2012.
- 7
- 8 35. Tinsley HE, Tinsley DJ. Uses of factor analysis in counseling psychology research. *Journal of*  
9 *counseling psychology* 1987;34(4):414.
- 10
- 11 36. Tabachnick BG, Fidell LS. Using multivariate statistics. Boston, MA: Allyn & Bacon 2007.
- 12
- 13 37. Cho YI, Johnson TP, VanGeest JB. Enhancing surveys of health care professionals: a meta-  
14 *analysis of techniques to improve response. Evaluation & the health professions*  
15 2013;36(3):382-407.
- 16
- 17 38. McLeod CC, Klabunde CN, Willis GB, et al. Health care provider surveys in the United States,  
18 2000–2010: a review. *Evaluation & the health professions* 2013;36(1):106-26.
- 19
- 20 39. Sorra J, Gray L, Streagle S. AHRQ Hospital Survey on Patient Safety Culture: User's Guide.  
21 Rockville, MD: Agency for Healthcare Research and Quality., 2016.
- 22
- 23 40. Allison PD. Missing data techniques for structural equation modeling. *Journal of abnormal*  
24 *psychology* 2003;112(4):545.
- 25
- 26 41. Hutchinson A, Cooper K, Dean J, et al. Use of a safety climate questionnaire in UK health  
27 *care: factor structure, reliability and usability. Quality and Safety in Health Care*  
28 2006;15(5):347-53.
- 29
- 30 42. Hill T, Lewicki P, Lewicki P. Statistics: methods and applications: a comprehensive reference  
31 *for science, industry, and data mining: StatSoft, Inc. 2006.*
- 32
- 33 43. Gerbing DW, Hamilton JG. Viability of exploratory factor analysis as a precursor to  
34 *confirmatory factor analysis. Structural Equation Modeling: A Multidisciplinary Journal*  
35 1996;3(1):62-72.
- 36
- 37 44. Henson RK, Roberts JK. Use of exploratory factor analysis in published research common  
38 *errors and some comment on improved practice. Educational and Psychological*  
39 *measurement* 2006;66(3):393-416.
- 40
- 41 45. Pett MA, Lackey NR, Sullivan JJ. Making sense of factor analysis: The use of factor analysis  
42 *for instrument development in health care research. Thousand Oaks, CA: Sage*  
43 *Publications 2003.*
- 44
- 45 46. Kline RB. Principles and practice of structural equation modeling. New York: Guilford  
46 *publications 2015.*
- 47
- 48 47. De Vellis RF, Dancer LS. Scale development: theory and applications. *Journal of Educational*  
49 *Measurement* 1991;31(1):79-82.
- 50
- 51 48. Field A. Discovering statistics using SPSS. London: Sage publications 2009.
- 52
- 53 49. Suhr D. Reliability, exploratory & confirmatory factor analysis for the scale of athletic  
54 *priorities. Diambil pada tanggal* 2003;2:274-28.
- 55
- 56 50. Kaiser HF. An index of factorial simplicity. *Psychometrika* 1974;39(1):31-36.
- 57
- 58
- 59
- 60



- 1
- 2
- 3
- 4 51. Hutcheson GD, Sofroniou N. The multivariate social scientist: Introductory statistics using
- 5 generalized linear models: Sage 1999.
- 6
- 7 52. Amos (Version 23.0) [Computer Program]
- 8 [program]. Chicago: SPSS, 2014.
- 9
- 10 53. Hu L, Bentler P. Cutoff criteria for fit indexes in covariance structure analysis: Conventional
- 11 criteria versus new alternatives. *Structural Equation Modelling* 1999;6(1):1 - 55.
- 12
- 13 54. Ullman JB. Structural equation modeling: Reviewing the basics and moving forward. *Journal*
- 14 *of personality assessment* 2006;87(1):35-50.
- 15
- 16 55. Cattell RB. The scree test for the number of factors. *Multivariate behavioral research*
- 17 1966;1(2):245-76.
- 18
- 19 56. Beavers AS, Lounsbury JW, Richards JK, et al. Practical considerations for using exploratory
- 20 factor analysis in educational research. *Practical assessment, research & evaluation*
- 21 2013;18(6):1-13.
- 22
- 23 57. Exploratory or confirmatory factor analysis? SAS Users Group International Conference
- 24 2006; Cary: SAS Institute, Inc.
- 25
- 26 58. Kline P. An easy guide to factor analysis. London; Newyork, N.Y.: Routledge 2014.
- 27
- 28 59. Sorra J, Nieva V. Hospital Survey on Patient Safety Culture. Rockville, MD: Agency for
- 29 Healthcare Research and Quality (AHRQ), 2004.
- 30
- 31 60. Alonazi MS. An evaluation of a patient safety culture tool in Saudi Arabia. The University of
- 32 Sheffield, 2011.
- 33
- 34 61. Najjar S, Hamdan M, Baillien E, et al. The Arabic version of the hospital survey on patient
- 35 safety culture: a psychometric evaluation in a Palestinian sample. *BMC health services*
- 36 *research* 2013;13(1):1.
- 37
- 38 62. Al-Awa B, Al Mazrooa A, Rayes O, et al. Benchmarking the post-accreditation patient safety
- 39 culture at King Abdulaziz University Hospital. *Annals of Saudi medicine* 2012;32(2)
- 40
- 41 63. Alahmadi H. Assessment of patient safety culture in Saudi Arabian hospitals. *Quality and*
- 42 *Safety in Health Care* 2010;19(5):1-5.
- 43
- 44 64. El-Jardali F, Jaafar M, Dimassi H, et al. The current state of patient safety culture in
- 45 Lebanese hospitals: a study at baseline. *International Journal for Quality in Health Care*
- 46 2010;22(5):386-95.
- 47
- 48 65. El-Jardali F, Dimassi H, Jamal D, et al. Predictors and outcomes of patient safety culture in
- 49 hospitals. *BMC Health Services Research* 2011;11(1):1.
- 50
- 51 66. Al-Mandhari A, Al-Zakwani I, Al-Kindi M, et al. Patient safety culture assessment in Oman.
- 52 *Oman medical journal* 2014;29(4):264-71.
- 53
- 54 67. Bahrami MA, Montazeralfaraj R, Chalak M, et al. Patient safety culture challenges: Survey
- 55 results of iranian educational hospitals. *Middle East J Sci Res* 2013;14(5):641-9.
- 56
- 57
- 58
- 59
- 60

- 1  
2  
3  
4 68. El-Jardali F, Sheikh F, Garcia NA, et al. Patient safety culture in a large teaching hospital in  
5 Riyadh: baseline assessment, comparative analysis and opportunities for improvement.  
6 *BMC health services research* 2014;14(1):1.  
7  
8 69. Eiras M, Escoval A, Grillo IM, et al. The hospital survey on patient safety culture in  
9 Portuguese hospitals: instrument validity and reliability. *International Journal of Health  
10 Care Quality Assurance* 2014;27(2):111-22.  
11  
12 70. Sarac C, Flin R, Mearns K, et al. Hospital survey on patient safety culture: psychometric  
13 analysis on a Scottish sample. *BMJ Quality & Safety* 2011;20(10):842-8.  
14  
15 71. Brborovic H, Sklebar I, Brborovic O, et al. Development of a Croatian version of the US  
16 hospital survey on patient safety culture questionnaire: Dimensionality and  
17 psychometric properties. *Postgraduate Medical Journal* 2014;90(1061):125-32.  
18  
19 72. Haugen AS, Softeland E, Eide GE, et al. Patient safety in surgical environments: cross-  
20 countries comparison of psychometric properties and results of the Norwegian version  
21 of the Hospital Survey on Patient Safety. *BMC Health Services Research* 2010;10:279.  
22  
23 73. Zhu J, Li L, Zhao H, et al. Development of a patient safety climate survey for Chinese  
24 hospitals: Cross-national adaptation and psychometric evaluation. *BMJ Quality and  
25 Safety* 2014;23(10):847-56.  
26  
27 74. Reis CT, Laguardia J, Vasconcelos AGG, et al. Reliability and validity of the Brazilian version  
28 of the Hospital Survey on Patient Safety Culture (HSOPSC): a pilot study. *Cadernos de  
29 Saúde Pública* 2016;32(11)  
30  
31 75. Robida A. Hospital Survey on Patient Safety Culture in Slovenia: a psychometric evaluation.  
32 *International Journal for Quality in Health Care* 2013;25(4):469-75.  
33  
34 76. Brajshori N, Behrens J. Translation, Cultural Adaption and Validation of Hospital Survey on  
35 Patient Safety Culture in Kosovo. *Open Journal of Nursing* 2016;6(06):483.  
36  
37 77. Hedsköld M, Pukk-Härenstam K, Berg E, et al. Psychometric properties of the hospital survey  
38 on patient safety culture, HSOPSC, applied on a large Swedish health care sample. *BMC  
39 Health Services Research* 2013;13  
40  
41 78. Saraç Ç. Safety climate in acute hospitals. University of Aberdeen, 2011.  
42  
43 79. Nie Y, Mao X, Cui H, et al. Hospital survey on patient safety culture in China. *BMC Health  
44 Services Research* 2013;13  
45  
46 80. Keiser NL. An Empirical Test of Context-Specific Safety Climate Measurement: A Comparison  
47 of Five Research Laboratory Safety Climate Measures to a General Measure of Safety  
48 Climate [Master's Thesis]. Texas A & M University, 2015.  
49  
50  
51  
52  
53  
54  
55  
56  
57  
58  
59

**Box 1: HSOPSC patient safety culture dimensions and definitions**<sup>39</sup>

| <b>Patient Safety Culture Composite</b>        | <b>Definition: <i>The extent to which...</i></b>                                                                                                                                                                           |
|------------------------------------------------|----------------------------------------------------------------------------------------------------------------------------------------------------------------------------------------------------------------------------|
| Communication Openness                         | Staff freely speak up if they see something that may negatively affect a patient and feel free to question those with more authority.                                                                                      |
| Feedback and Communication About Error         | Staff are informed about errors that happen, are given feedback about changes implemented, and discuss ways to prevent errors.                                                                                             |
| Frequency of Events Reported                   | Mistakes of the following types are reported: (1) mistakes caught and corrected before affecting the patient, (2) mistakes with no potential to harm the patient, and (3) mistakes that could harm the patient but do not. |
| Handoffs and Transitions                       | Important patient care information is transferred across hospital units and during shift changes.                                                                                                                          |
| Management Support for Patient Safety          | Hospital management provides a work climate that promotes patient safety and shows that patient safety is a top priority.                                                                                                  |
| Nonpunitive Response to Error                  | Staff feel that their mistakes and event reports are not held against them and that mistakes are not kept in their personnel file.                                                                                         |
| Organizational Learning—Continuous Improvement | Mistakes have led to positive changes and changes are evaluated for effectiveness.                                                                                                                                         |
| Overall Perceptions of Patient Safety          | Procedures and systems are good at preventing errors and there is a lack of patient safety problems.                                                                                                                       |

| <b>Patient Safety Culture Composite</b>                              | <b>Definition: <i>The extent to which...</i></b>                                                                                                                                 |
|----------------------------------------------------------------------|----------------------------------------------------------------------------------------------------------------------------------------------------------------------------------|
| Staffing                                                             | There are enough staff to handle the workload and work hours are appropriate to provide the best care for patients.                                                              |
| Supervisor/Manager Expectations and Actions Promoting Patient Safety | Supervisors/managers consider staff suggestions for improving patient safety, praise staff for following patient safety procedures, and do not overlook patient safety problems. |
| Teamwork Across Units                                                | Hospital units cooperate and coordinate with one another to provide the best care for patients.                                                                                  |
| Teamwork Within Units                                                | Staff support each other, treat each other with respect, and work together as a team.                                                                                            |

1  
2  
3 **Figure legends:**  
4

5 **Figure 1 title: Scree plot of the final EFA solution (Eight factors, 22 items)**  
6

7 **Box 1: HSOPSC patient safety culture dimensions and definitions 39**  
8  
9  
10  
11  
12  
13  
14  
15  
16  
17  
18  
19  
20  
21  
22  
23  
24  
25  
26  
27  
28  
29  
30  
31  
32  
33  
34  
35  
36  
37  
38  
39  
40  
41  
42  
43  
44  
45  
46  
47  
48  
49  
50  
51  
52  
53  
54  
55  
56  
57  
58  
59  
60

Figure.1: Scree plot of the final EFA solution (Eight factors, 22 items)

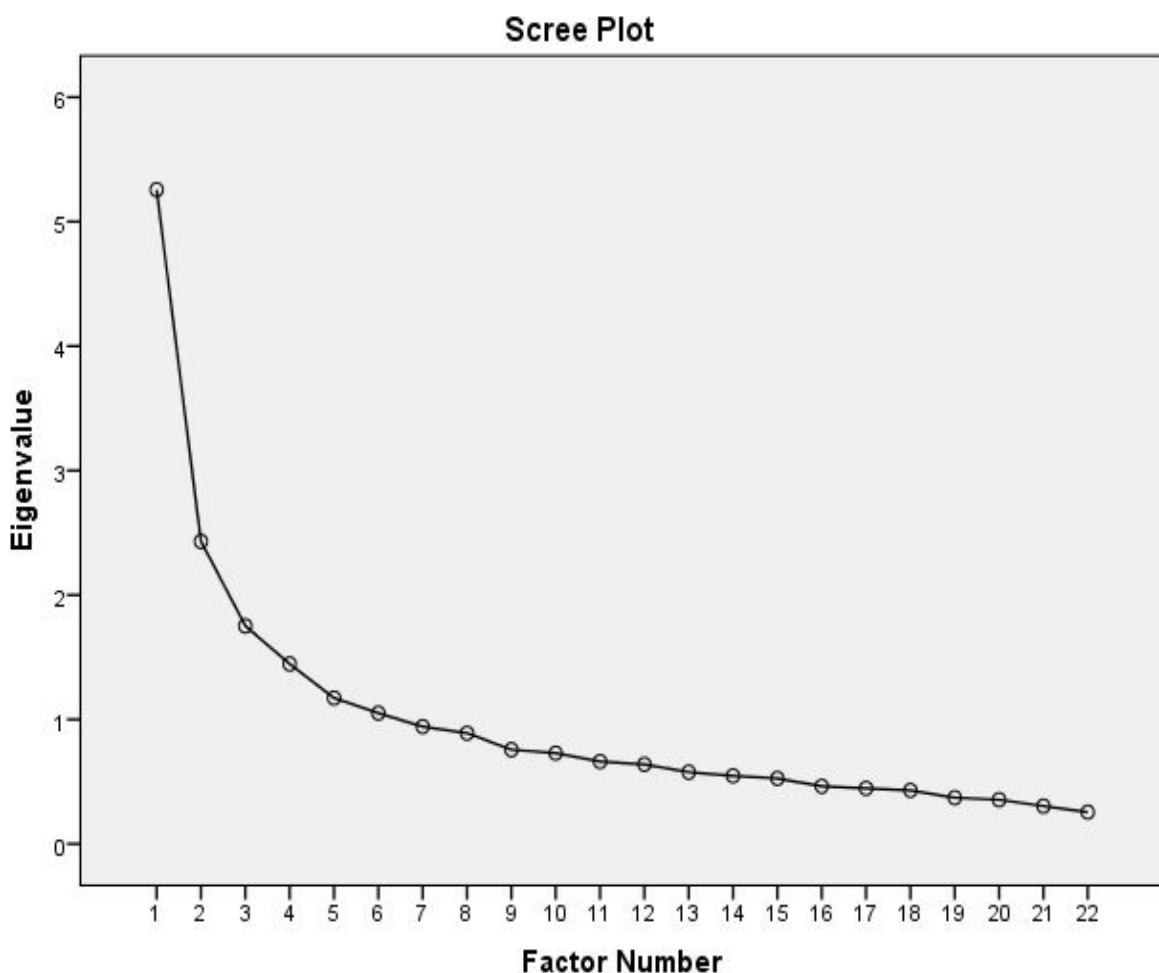

Only

**Appendix 1: Professional and personal characteristics of study respondents (n=1,310)**

| <b>Variable</b>        | <b>Category</b>                             | <b>Frequency (n)</b> | <b>Percentage (%)</b> |
|------------------------|---------------------------------------------|----------------------|-----------------------|
| Staff Position         | Assistant Nurse                             | 30                   | 2.4                   |
|                        | Nurse                                       | 697                  | 55.0                  |
|                        | Head nurse/Nurse manager                    | 27                   | 2.1                   |
|                        | Unit Assistant/Clerk                        | 4                    | 0.3                   |
|                        | Attending/Staff Physician                   | 227                  | 17.9                  |
|                        | Resident Physician/Physician in training    | 41                   | 3.2                   |
|                        | Pharmacist                                  | 21                   | 1.7                   |
|                        | Dietician                                   | 10                   | 0.8                   |
|                        | Respiratory Therapist                       | 3                    | 0.2                   |
|                        | Physical, Occupational, or Speech Therapist | 18                   | 1.4                   |
|                        | Technician                                  | 176                  | 13.9                  |
|                        | Management                                  | 13                   | 1.0                   |
| Gender                 | Male                                        | 479                  | 37.2                  |
|                        | Female                                      | 808                  | 62.8                  |
| Direct Patient Contact | Yes                                         | 1112                 | 88.5                  |
|                        | No                                          | 144                  | 11.5                  |



**Appendix 2:  
HSOPSC Eight factor model in Kuwait and individual item standardised path coefficients**

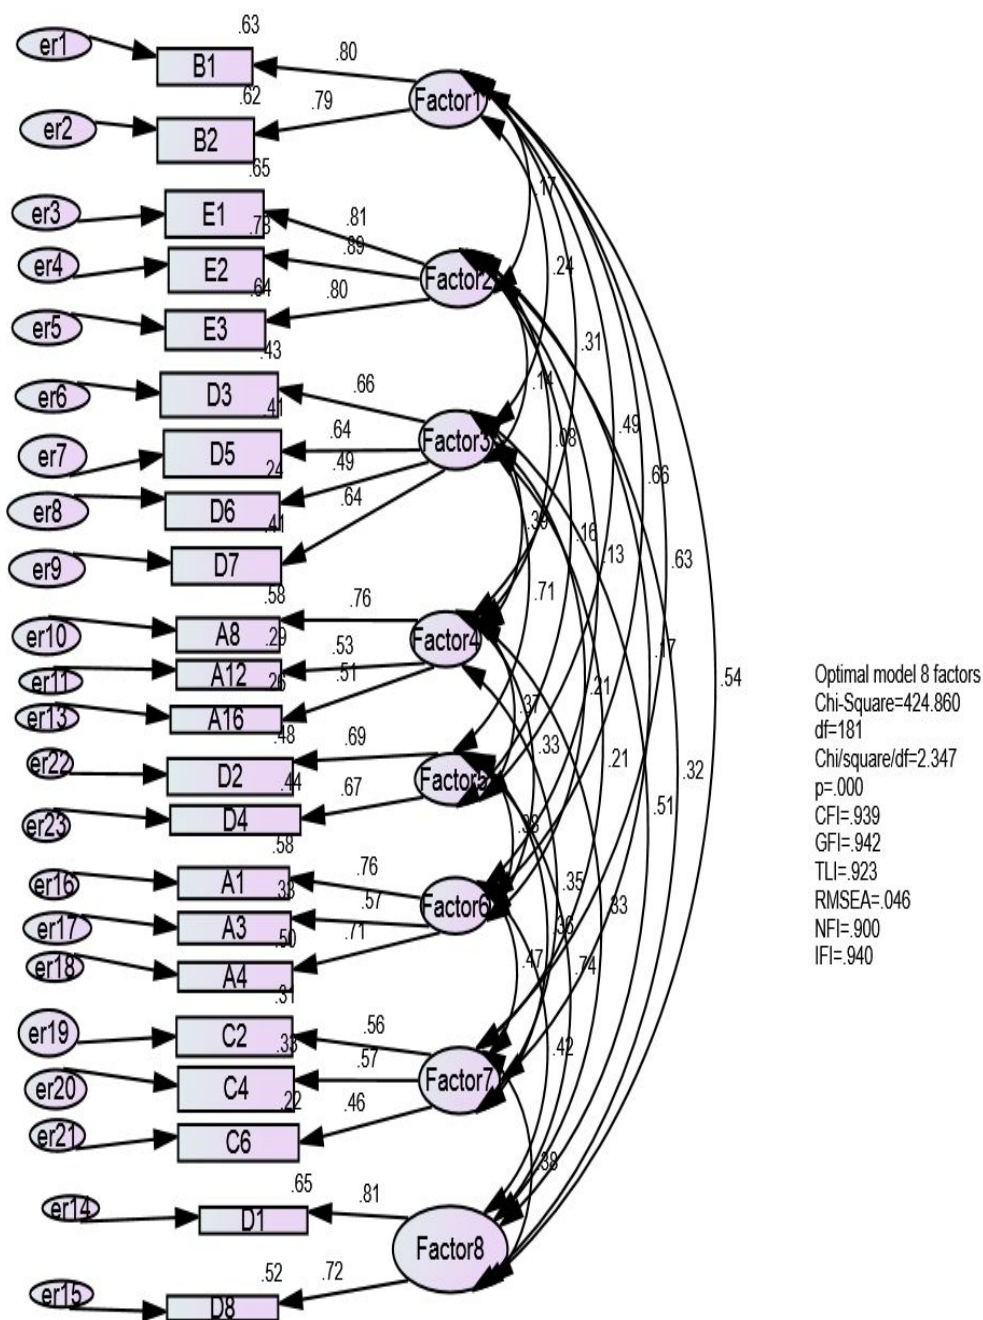

### Appendix 3: Inter-correlations between Eight factors (scales)

| N | Scales                                                               | 1        | 2        | 3        | 4        | 5        | 6        | 7        |
|---|----------------------------------------------------------------------|----------|----------|----------|----------|----------|----------|----------|
| 1 | Supervisor/Manager Expectations and Actions Promoting Patient Safety | -        |          |          |          |          |          |          |
| 2 | Frequency of Events Reported                                         | 0,155*** |          |          |          |          |          |          |
| 3 | Handoffs and Transitions                                             | 0,286*** | 0,183*** |          |          |          |          |          |
| 4 | Non-punitive Response to Errors                                      | 0,339*** | 0,133*** | 0,371*** |          |          |          |          |
| 5 | Teamwork Across Units                                                | 0,51***  | 0,228*** | 0,64***  | 0,435*** |          |          |          |
| 6 | Teamwork Within Units                                                | 0,664*** | 0,105**  | 0,236*** | 0,356*** | 0,392*** |          |          |
| 7 | Communication Openness                                               | 0,614*** | 0,088*   | 0,259*** | 0,431*** | 0,404*** | 0,517*** |          |
| 8 | Management Support for Patient Safety                                | 0,519*** | 0,311*** | 0,531*** | 0,322*** | 0,722*** | 0,432*** | 0,353*** |

\*\*\* p<0.001, \*\* p<0.01, \*p<0.05



1  
2  
3  
4  
5  
6  
7  
8  
9  
10  
11  
12  
13  
14  
15  
16  
17  
18  
19  
20  
21  
22  
23  
24  
25  
26  
27  
28  
29  
30  
31  
32  
33  
34  
35  
36  
37  
38  
39  
40  
41  
42  
43  
44  
45  
46  
47

**Appendix 4: Dimensions of HSOPSC for USA (US), Kuwait (KWT), Saudi Arabia (SA), Palestine (PAL), England (ENG), Scotland (SCO), Netherlands (NL), Switzerland (Swiss) and Turkey (TUR) factor models**

| <b>HSOPSC Dimensions</b>                                     | <b>US<br/>59</b> | <b>KWT</b> | <b>SA<br/>60</b> | <b>PAL<br/>61</b>                      | <b>ENG<br/>31</b> | <b>SCO<br/>78</b>                      | <b>NL<br/>30</b>                                                      | <b>TUR<br/>26</b>                                                                     | <b>SWISS<br/>27</b>                    |
|--------------------------------------------------------------|------------------|------------|------------------|----------------------------------------|-------------------|----------------------------------------|-----------------------------------------------------------------------|---------------------------------------------------------------------------------------|----------------------------------------|
| Supervisor/manager expectations and actions promoting safety | √                | √          | √                | √                                      | √                 | √                                      | -                                                                     | -                                                                                     | √                                      |
| Organisational learning— continuous improvement              | √                | -          | √                | √                                      | -                 | √                                      | √                                                                     | √                                                                                     | √<br>With<br>Teamwork<br>within units  |
| Teamwork within hospital units                               | √                | √          | √                | √                                      | √                 | √                                      | √                                                                     | √                                                                                     | -                                      |
| Communication openness                                       | √                | √          | √                | -                                      | √                 | -                                      | √                                                                     | √                                                                                     | -                                      |
| Feedback and communication about error                       | √                | -          | -                | √<br>With<br>Communication<br>Openness | √                 | √<br>With<br>Communication<br>Openness | √<br>With<br>Organisational<br>learning—<br>continuous<br>improvement | √<br>With<br>Supervisor<br>expectations<br>and actions<br>promoting<br>patient safety | √<br>With<br>Communication<br>Openness |
| Non-punitive response to error                               | √                | √          | √                | √                                      | √                 | √                                      | √                                                                     | √                                                                                     | √                                      |
| Staffing                                                     | √                | -          | √                | √                                      | -                 | -                                      | √                                                                     | √                                                                                     | -                                      |
| Hospital management support for patient safety               | √                | √          | -                | √                                      | -                 | √                                      | √                                                                     | √<br>With<br>Teamwork<br>across units                                                 | √                                      |

| <b>HSOPSC Dimensions</b>              | <b>US<br/>59</b> | <b>KWT</b> | <b>SA<br/>60</b> | <b>PAL<br/>61</b> | <b>ENG<br/>31</b>  | <b>SCO<br/>78</b>  | <b>NL<br/>30</b> | <b>TUR<br/>26</b> | <b>SWISS<br/>27</b>                   |
|---------------------------------------|------------------|------------|------------------|-------------------|--------------------|--------------------|------------------|-------------------|---------------------------------------|
| Teamwork across hospital units        | √                | √          | -                | √                 | √                  | √                  | √                | -                 | -                                     |
| Hospital handoffs and transitions     | √                | √          | √                | √                 | √                  | √                  | √                | √                 | √<br>With<br>Teamwork<br>across units |
| Frequency of incident reporting       | √                | √          | √                | √                 | √                  | √                  | √                | √                 | √                                     |
| Overall perceptions of patient safety | √                | -          | -                | √                 | √<br>With Staffing | √<br>With Staffing | √                | √                 | √<br>With Staffing                    |
| Number of optimal model factors       | 12               | 8          | 8                | 11                | 9                  | 10                 | 11               | 10                | 8                                     |

1  
2  
3  
4  
5  
6  
7  
8  
9  
10  
11  
12  
13  
14  
15  
16  
17  
18  
19  
20  
21  
22  
23  
24  
25  
26  
27  
28  
29  
30  
31  
32  
33  
34  
35  
36  
37  
38  
39  
40  
41  
42  
43  
44  
45  
46  
47

**Appendix 5: Item composition of dimensions of HSOPSC for USA (US), Kuwait (KWT), Saudi Arabia (SA), Palestine (PAL), England (ENG), Netherlands (NL), Switzerland (Swiss) and Turkey (TUR) factor models**

| HSOPSC Factors                                                       | USA <sup>59</sup> | Kuwait        | SA <sup>60</sup> | ENG <sup>31</sup> | PAL <sup>61</sup> |  | SWISS <sup>27</sup>    | NL <sup>30</sup>    | TUR <sup>26</sup> |
|----------------------------------------------------------------------|-------------------|---------------|------------------|-------------------|-------------------|--|------------------------|---------------------|-------------------|
| Supervisor/Manager Expectations and Actions Promoting Patient Safety | B1-B2-B3-B4       | B1-B2         | B1-B2            | B1-B2             | B1-B2-B3-B4       |  | B1-B2-B3-B4            | B1-B2-B3-B4         | ‡                 |
| Frequency of Events Reported                                         | E1-E2-E3*         | E1-E2-E3      | E1-E2-E3         | E1-E2-E3          | E1-E2-E3          |  | E1-E2-E3               | E1-E2-E3            | E1-E2-E3          |
| Handoffs and Transitions                                             | D3-D5-D7-D11*     | D3-D5-D7-D6** | D5- D7-D11-D6**  | D3-D5-D7-D11      | D3-D5-D7-D11      |  | ‡                      | D5 -D11             | D3-D5-D7-D11      |
| Non-punitive Response to Errors                                      | A8-A12-A16        | A8-A12-A16    | A8-A12-A16       | A8-A16            | A8-A12-A16        |  | A8-A12-A16             | A8-A12-A16          | A8-A12-A16        |
| Teamwork Across Units                                                | D2-D4-D6-D10*     | D2-D4         | -                | D2-D4-D6-D10      | D2-D4-D6-D10      |  | D2-D4-D6-D10-D3**-D7** | D2-D4-D10-D3**-D7** | ‡                 |
| Teamwork Within Units                                                | A1-A3-A4-A11      | A1-A3-A4      | A1-A3-A4         | A1-A3-A4          | A1-A3-A4-A11      |  | A1-A3-A4-A6-A9-A13‡    | A1-A3-A4-A11        | A1-A3-A4-A11      |
| Communication Openness                                               | C2-C4-C6          | C2-C4-C6      | C2-C4            | C2-C4-C6          | C2-C4-C3-C5‡      |  | ‡                      | C2-C4-C6            | C2-C4-C6          |

| <b>HSOPSC Factors</b>                          | <b>USA</b><br>59 | <b>Kuwait</b> | <b>SA</b><br>60 | <b>ENG</b><br>31 | <b>PAL</b><br>61 |  | <b>SWISS</b><br>27     | <b>NL</b><br>30    | <b>TUR</b><br>26      |
|------------------------------------------------|------------------|---------------|-----------------|------------------|------------------|--|------------------------|--------------------|-----------------------|
| Management Support for Patient Safety          | D1-D8-D9*        | D1-D8         | -               | -                | D1-D8-D9         |  | D1-D8-D9               | D1-D8-D9           | D1-D8-D9              |
| Organisational learning—continuous improvement | A6-A9-A13        | -             | A6-A9-A13-D8**  | -                | A6-A9-A13        |  | ‡                      | ‡                  | A6-A9-A13             |
| Feedback and communication about error         | C1-C3-C5         | -             | -               | C1-C3-C5         | ‡                |  | C1-C3-C5-C2-C4-C6‡     | C1-C3-C5-A6-A9-A13 | C1-C3-C5-B1-B2-B3-B4‡ |
| Staffing                                       | A2-A5-A7-A14     | -             | A5-A7           | A2-A14-A10-A17‡  | A2-A5-A14        |  | A2-A5-A14-A10-A17-A18‡ | A2-A5-A7           | A2-A5-A7-A14          |
| Overall perceptions of safety                  | A10-A15-A17-A18  | -             | -               | ‡                | A15-A17-A18      |  | ‡                      | A10-A17-A18-A14**  | A10-A15-A17-A18       |
| No of factors                                  | 12               | 8             | 8               | 9                | 11               |  | 8                      | 11                 | 10                    |

\*For comparison reasons, items with the letter F have been changed to letter D and items with the letter D have been changed to letter E as the modified version used in our study, ‡ denotes a merged dimension, \*\* denotes a moved item from a different dimension

1  
2  
3  
4  
5  
6  
7  
8  
9  
10  
11  
12  
13  
14  
15  
16  
17  
18  
19  
20  
21  
22  
23  
24  
25  
26  
27  
28  
29  
30  
31  
32  
33  
34  
35  
36  
37  
38  
39  
40  
41  
42  
43  
44  
45  
46  
47  
48  
49  
50  
51  
52  
53  
54  
55  
56  
57  
58  
59  
60

For peer review only

# BMJ Open

## Hospital Survey on Patient Safety Culture: Psychometric evaluation in Kuwaiti Public Healthcare Settings

|                                 |                                                                                                                                                                                                                                             |
|---------------------------------|---------------------------------------------------------------------------------------------------------------------------------------------------------------------------------------------------------------------------------------------|
| Journal:                        | <i>BMJ Open</i>                                                                                                                                                                                                                             |
| Manuscript ID                   | bmjopen-2018-028666.R1                                                                                                                                                                                                                      |
| Article Type:                   | Research                                                                                                                                                                                                                                    |
| Date Submitted by the Author:   | 05-Mar-2019                                                                                                                                                                                                                                 |
| Complete List of Authors:       | Alsalem, Gheed; University of Glasgow, institute of health and wellbeing; Ministry of health, Quality and Accreditation Directorate<br>Bowie, Paul; NHS Scotland,<br>Morrison, Jill; University of Glasgow, General Practice & Primary Care |
| <b>Primary Subject Heading</b>: | Health services research                                                                                                                                                                                                                    |
| Secondary Subject Heading:      | Health policy, Public health, Research methods, Evidence based practice                                                                                                                                                                     |
| Keywords:                       | patient safety, safety culture, psychometrics, surveys, quality improvement                                                                                                                                                                 |
|                                 |                                                                                                                                                                                                                                             |

SCHOLARONE™  
Manuscripts

# Hospital Survey on Patient Safety Culture: Psychometric evaluation in Kuwaiti Public Healthcare Settings

Gheed Al Salem<sup>1</sup>, Paul Bowie<sup>2</sup>, Jill Morrison<sup>3</sup>

1. PhD Student, Institute of Health and Wellbeing, University of Glasgow, UK / Ministry of Health, Kuwait
2. Programme Director NHS Education for Scotland, Glasgow, UK / Hon Associate Professor, Institute of Health and Wellbeing, University of Glasgow, Glasgow, UK
3. Professor of General Practice, Institute of Health and Wellbeing, University of Glasgow, Glasgow, UK

## <sup>1</sup>CORRESPONDING AUTHOR

Institute of Health and Wellbeing,  
General Practice and Primary Care,  
University of Glasgow, 1, Horselethill Road, Glasgow, G12 9LX  
United Kingdom  
Tel: +44(0)141 330 8348  
Fax: +44 (0)141 330 8331  
Email: [drgheed@aol.com](mailto:drgheed@aol.com)

<sup>2</sup>NHS Education for Scotland, Glasgow, Scotland, UK  
2 Central Quay, 89 Hydepark Street, Glasgow, G3 8BW  
Tel: +44(0)141 223 1400/1401  
Fax: +44(0)141 223 1403  
Email: [paul.bowie@nes.scot.nhs.uk](mailto:paul.bowie@nes.scot.nhs.uk)

<sup>3</sup>Clerk of Senate and Vice Principal  
Senate Office  
University of Glasgow  
Level 5, Main Building  
Tel: +44(0)141 330 8744  
Email: [Jill.Morrison@glasgow.ac.uk](mailto:Jill.Morrison@glasgow.ac.uk)

Word count: 3998

## ABSTRACT

### Objective

As healthcare organisations endeavor to improve the quality and safety of their services, there is increasing recognition of the importance of building a culture of safety to promote patient safety and improve the outcomes of patient care. Surveys of safety culture/climate have not knowingly been conducted in Kuwait public hospitals, nor are valid or reliable survey instruments available for this context. This study aims to investigate the psychometric properties of the HSOPSC (Hospital Survey of Patient Safety Culture) tool in Kuwait public hospitals in addition to constructing an optimal model to assess the level of safety climate in this setting.

### Design

cross-sectional study.

### Setting

Three public hospitals in Kuwait.

### Participants

About 1,317 healthcare professionals.

### Main outcome measure

An adapted and contextualised version of HSOPSC was used to conduct psychometric evaluation including exploratory factor analysis, confirmatory factor analysis reliability and correlation analysis.

### Results

1,317 questionnaires (87%) were returned. Psychometric evaluation, showed an optimal model of Eight factors and 22 safety climate items. All items have strong factor loadings (0.42-0.86) and are theoretically related. Reliability analysis showed satisfactory results ( $\alpha > 0.60$ ).



## Conclusions

This is the first validation study of a standardised safety climate measure in a Kuwaiti healthcare setting. An optimal model for assessing patient safety climate was produced that mirrors other international studies and which can be used for measuring the prevailing safety climate. More importance should be attached to the psychometric fidelity of safety climate questionnaires before extending their use in other healthcare culture and contexts internationally.

**KEYWORDS:** patient safety, safety culture, psychometrics, surveys, quality improvement.

**STRENGTHS AND LIMITATIONS OF THIS STUDY:**

- A rigorous and scientific psychometric approach was designed and executed based on recommended reporting practices with strengths of both EFA and CFA analytical techniques were used to test the original HSOPSC model and construct an optimal model.
- The large sample size (n=1280) allowed for the dataset to be split and for factor analysis to be undertaken with acceptable model fit indices.
- One limitation is the number of items per factor in the optimal model. Three factors contained only two items per factor in the final Eight-factor model.
- Another limitation is the exclusion of partially answered questionnaires. As a result, a subset of the total sample, with all items answered, was used for the validation of the psychometric properties of the HSOPSC.

## INTRODUCTION

Modern healthcare systems are concerned with improving the safety of patient care and attempting to build a strong organisational safety cultures. “Safety Culture” is identified as a key element of a healthcare organisation’s ability to learn openly from safety incidents and reduce preventable harm to patients. The perceived importance of safety culture in improving patient safety and its impact on clinical outcomes has led to a growing interest in the assessment of safety culture in healthcare organisations. The use of survey questionnaires is one of the most popular methods for assessing safety culture. These surveys aim to measure healthcare workers' perceptions of the prevailing safety culture or “safety climate” in their organisations.

There are numerous definitions of safety culture and safety climate. Despite their distinctive terminologies, they are commonly used arbitrarily and interchangeably in the literature <sup>1</sup>. Safety culture has been described as a set of shared values, beliefs, norms, and attitudes that interact with an organisation’s structure and control systems resulting in behavioural norms <sup>2 3</sup>. Safety climate provides a “snapshot” of the perceptions held by healthcare workers about visible, surface level features of safety culture at a given point in time <sup>4</sup>. It “*assesses workforce perceptions of procedures and behaviours in their work environment that indicate the priority given to safety relative to other organisational goals*” <sup>5</sup>.

Assessing the status of the existing safety climate in a healthcare organisation is promoted as the first step for developing a strong and solid safety culture <sup>6</sup>. The resulting data potentially offers policymakers, healthcare providers, teams and managers a clear view of areas in need of attention to strengthen the prevailing safety climate, in addition to identifying specific challenges that impede progress in safety initiatives <sup>7</sup>. It can also be used for benchmarking and improving safety climate measures across time and between organisations on national and international levels <sup>8 9</sup>.

A range of safety climate assessment tools have been developed for acute hospital settings, although the scientific rigour with which they were designed and tested is variable <sup>5 10 11</sup>.

Multiple reviews of patient safety climate instruments have been published <sup>5 10-16</sup>. Most concluded that the Safety Attitudes Questionnaire (SAQ) and Hospital Survey on Patient Safety Culture

1  
2  
3 (HSOPSC) were the most appropriate tools available in terms of their psychometric properties, but  
4 also critiqued climate tools generally as many lack appropriate scale development, validation and  
5 evidence for their predictive validity. Over a decade ago, Flin, et al. <sup>5</sup> argued that it is essential  
6 that tools are developed with robust psychometric properties to enable valid interpretations of  
7 patient safety climate test scores to be made.  
8  
9  
10  
11  
12

13  
14 Despite this, many published studies are still limited in their reporting of the necessary  
15 psychometric properties of questionnaires <sup>5 10 17 18</sup>. It is argued that HSOPSC is one of the most  
16 rigorously tested instruments with good psychometric properties in addition to being tested on the  
17 necessary large sample sizes <sup>5</sup>. Psychometric analysis involves the use of established statistical  
18 assessment techniques to assess the psychometric properties of questionnaires and identify the  
19 underlying safety culture dimensions <sup>11</sup>.  
20  
21  
22  
23  
24  
25

26 Repeated high-profile media coverage has drawn the attention of Kuwaiti politicians and the public  
27 to failings in healthcare delivery and patient safety, which has contributed to growing demands for  
28 a better quality of care <sup>19-21</sup>. Subsequent inquiries and reports have placed patient safety high on  
29 the Kuwait policy agenda. The Ministry of Health (MOH) responded by investing significantly in  
30 the improvement of healthcare services. Safety climate assessment is one of the latest approaches  
31 to be adopted by the MOH with the goal of evaluating and improving patient safety in Kuwaiti  
32 hospitals.  
33  
34  
35  
36  
37  
38

39  
40 Surveys of safety climate have yet to be conducted at public hospitals in the state of Kuwait, nor  
41 are valid or reliable survey instruments available for this purpose. This study aims, therefore, to  
42 assess the psychometric properties of the HSOPSC tool in Kuwaiti public hospitals in addition to  
43 constructing an optimal model to assess the level of safety climate in this setting and to benchmark  
44 the data against other international studies.  
45  
46  
47  
48  
49  
50  
51  
52  
53  
54  
55  
56  
57  
58  
59  
60

## METHOD

### Instrument selection

HSOPSC is a 12-factor, 42 item survey questionnaire. It assesses ten climate dimensions of patient safety, with two outcome measures (overall perceptions of patient safety and frequency of event reporting). Two additional single-item outcome measure are included<sup>22 23</sup>. The HSOPSC tool was chosen for this study for several reasons. Firstly, a systematic review of tools designed for acute hospital settings concluded that HSOPSC had good overall methodological quality with good assessment of the tool's reported psychometric properties (Alsalem et al 2018). Secondly, HSOPSC was one of the most rigorously tested instruments at the time of selection, with extensive literature reporting its psychometric properties<sup>5</sup>. The tool has been extensively used in hospitals in the United States where it was originally developed<sup>24</sup>, and validated for use in more than 60 countries and translated into 30 different languages<sup>25-32</sup>. Thirdly, HSOPSC is a comprehensive measure of safety climate as it assesses key aspects related to patient safety at multiple levels of analysis including the individual, unit and hospital levels (Box 1). Finally, the tool is freely available, uses clear language with a scale that is simple and easy to follow.

### Instrument modification

The English version of the tool was pilot tested and modified for Kuwaiti healthcare in order to solve any technical and feasibility issues associated with its application<sup>33 34</sup>. Seven face-to-face interviews were conducted with a panel of healthcare staff from MOH (including doctors, nurses and risk and safety officers) to evaluate HSOPSC content and ensure the proper transfer of the intended meaning of the questionnaire items to the culture and language differences in the Kuwait context. The panel endorsed the HSOPSC content as being of high relevance to safety culture in Kuwaiti hospitals. All items were retained. However, wording was modified in eight items to clarify their meaning as some comments indicated potential ambiguity in items' interpretations.

### Instrument testing

A stratified random sample was drawn from healthcare clinical staff in three public hospitals in Kuwait. To ensure that the sample size was adequate to satisfactorily undertake factor analysis (FA), sample size requirements (sample size of the study, ratio of the sample size to the number

1  
2  
3 of variables, ratio of the number of variables to the number of factors) were evaluated <sup>35</sup>.  
4  
5 Tabachnick and Fidell <sup>36</sup> rule recommends having at least 300 cases to undertake FA. The Kaiser-  
6  
7 Meyer-Olkin (KMO) coefficient was used as another measure of sampling adequacy. KMO  
8  
9 coefficient values range between 0 and 1. Surveys of health professionals can be challenging and  
10  
11 are characterised by declining response rates <sup>37</sup> with a significant downward trend in response rates  
12  
13 from 1998 to 2008 <sup>38</sup>. Based on their findings, the predicted response rate for this study was 20%  
14  
15 and it was estimated that the sample size should be a minimum of 1,500 of distributed  
16  
17 questionnaires.

### 18 19 **Data collection and management**

20  
21 Staff members were invited by letter to participate in the study. Questionnaires were distributed  
22  
23 across different departments in the three public hospitals. The questionnaires were completed  
24  
25 anonymously and returned to multiple collection boxes located within the hospitals. Data were  
26  
27 coded and entered into an electronic data file using the Statistical Package for Social Science  
28  
29 (SPSS 24). Negatively worded items were reverse coded. If less than one entire section of the  
30  
31 survey was answered or less than half of the items throughout the entire survey (in different  
32  
33 sections) were answered, or if every item was answered the same, these questionnaires were  
34  
35 excluded <sup>39</sup>. Missing values were deleted in a listwise manner in order to minimise any possible  
36  
37 biases <sup>40</sup>.

### 38 39 **Factor analysis (FA)**

40  
41 FA is a statistical method that “*explores the extent to which individual items in a questionnaire*  
42  
43 *can be grouped together according to the correlations between the responses to them*”, thus  
44  
45 reducing the dimensionality of the data <sup>41</sup>. It can be applied as a data reduction or a structure  
46  
47 detection method <sup>42</sup>. The two main techniques of FA are Exploratory Factor Analysis (EFA), and  
48  
49 Confirmatory Factor Analysis (CFA), which are both recommended to test construct validity <sup>43</sup>.

50  
51 EFA allows the researcher to uncover the main dimensions to develop a theory, or model from a  
52  
53 smaller number of latent constructs that are often represented by a larger set of measured variables  
54  
55 <sup>44 45</sup>. CFA tests a pre-determined factor structure or a proposed theory <sup>44 45</sup>. This study combined  
56  
57 both approaches to develop an optimal model, based on the original HSOPSC model, for  
58  
59

1  
2  
3 specifically assessing patient safety climate in Kuwaiti public hospitals. Due to the controversy  
4 associated with conducting EFA and CFA on the same data, a split-half validation technique is  
5 recommended<sup>46 47</sup>. Therefore, the Kuwaiti dataset was randomly split into two independent  
6 datasets using SPSS 24. Each group contains a set of 640 (n=640) cases - the calibration half of  
7 the dataset was used for model construction and the validation half of the dataset was used for  
8 confirming the explored factor structure resulting from model construction.  
9

10  
11  
12  
13  
14  
15 Data analysis was based on three main phases. 1. To investigate whether the original HSOPSC 12-  
16 factor model is appropriate for the Kuwaiti data. Both CFA and reliability analysis were used at  
17 this step. 2. To examine whether an alternative factor model would fit the Kuwaiti data better. For  
18 model construction, EFA was carried out using the calibration half of the dataset (Sample A,  
19 n=640). 3. Undertaking CFA and reliability analysis using the validation half of the dataset, to test  
20 the fit of the resultant model from the previous phase (Sample B, n=640). Cronbach's alpha ( $\alpha$ )  
21 was calculated for each factor to examine the internal consistency or reliability with the minimum  
22 criterion for acceptable reliability of at least  $\alpha \geq 0.60$  as recommended for the majority of research  
23 purposes<sup>48 49</sup>. Factor correlations of the optimal model were performed in addition to comparisons  
24 between the CFA output of our optimal factor model and the outputs reported in previous studies.  
25  
26  
27  
28  
29  
30  
31  
32  
33

### 34 **Patient and public involvement statement**

35 Patient and public were not involved in the analysis of this study.  
36  
37  
38

## 39 **RESULTS**

### 40 41 42 **Response rate and sample demographics**

43 Of the 1,511 questionnaires distributed at the three hospitals, 1,317 questionnaires (87%) were  
44 returned. A KMO statistic of 0.88 was calculated, which indicates that the sample has a sufficient  
45 level of homogeneity<sup>50 51</sup>. Thirty-seven questionnaires were excluded. Appendix 1 summarizes  
46 the relevant demographics of survey respondents.  
47  
48  
49  
50  
51  
52  
53  
54  
55  
56  
57  
58  
59  
60

## Instrument testing

Following the deletion of missing values, one thousand, two hundred and eighty questionnaires (n=1280) were considered eligible and this number of completed questionnaires (n=1280) was sufficient to undertake FA.

### Testing the original HSOPSC (12-factor) model

A CFA was performed, using AMOS software<sup>52</sup>, to test the model fit of the original HSOPSC 12-factor structure using the Kuwaiti data (n=1280). The global fit of our model was not consistently satisfactory for the Kuwaiti data. Three criteria measures did not indicate an acceptable fit with Comparative Fit Index (CFI) = 0.81 (CFI values  $\geq 0.90$  considered a good model fit<sup>53</sup>), Chi-squared statistic per one degree of freedom ( $\chi^2/DF$ ) = 4.81 ( $\chi^2/DF$  value  $\leq 2$  for a good fit<sup>54</sup>), and TLI = 0.784 (TLI of  $> 0.90$  indicates a good fit<sup>53</sup>) values indicate that the fit is not adequately good enough to confirm the proposed factor structure.

The internal consistency of the Kuwaiti data (n=1280) was  $\geq 0.60$  within nine dimensions. Three dimensions had internal consistencies less than 0.60. Additionally, two dimensions have a questionable internal consistency because their Cronbach's alpha value was 0.60 (Cronbach's  $\alpha=0.604$  for "Non-punitive Response to Errors" and Cronbach's  $\alpha=0.601$  for "communication openness"). In summary, the results of the CFA and reliability analysis indicate that the original HSOPSC 12 Factor model is not a satisfactory fit when it is used for the Kuwaiti data. Therefore, an EFA was used for investigating an alternative factor structure which might be more appropriate for Kuwaiti data.

### Construction of an optimal model

EFA consists of two basic stages. 1. Estimating the number of factors that should be extracted to represent the HSOPSC factor structure; and 2. Interpreting the meaning of the extracted factors and representing them in terms of theoretical structures that reflect the patient safety climate dimensions. EFA (principal axis factoring with varimax then oblique rotation) was performed on the calibration half of the dataset (n=640). Based on the Kaiser criterion of Eigenvalues greater than one (Eigenvalues  $> 1$ )<sup>50</sup> and Cattell scree plot<sup>55</sup>, different numbers of factors (12,11,10,9,8,7 factors) were extracted and investigated to find the optimal alternative model (see Appendix 2).



Following the rotation of factors the factor pattern matrix was examined to decide on the acceptable level of loading for variables to define factors<sup>56</sup>. To reach a satisfactory solution, a number of points need to be taken into consideration including identifying items with low communalities (<0.3), no or low loading (<0.4), items with cross loadings (>0.30) and the theoretical structure of items. It should be noted that the decision on how many factors to retain based on the degree of comprehensibility and interpretability of the factor structure in the context of the research<sup>57</sup>. In addition, theoretical knowledge regarding the construct under study is more significant than a statistical measure and the items and factors should make conceptual sense and be theoretically related<sup>56</sup>.

#### Final factor solution

An Eight-factor solution (all loadings  $\geq 0.40$ ) showed the best model fit to the Kuwaiti dataset. The Scree plot of the final EFA solution is shown in Figure 1. The structure and factor loadings of the final EFA solution are reported in Table 1. The final solution explains 50.2% of variance by eight extracted factors and represents 22 items from the safety climate questionnaire (20 items were excluded). All factor loadings are within the range of 0.428-0.864.

**Table 1: Pattern matrix of the final EFA solution (Eight factors, 22 items)**

| Variable                                                                                                                         | Factor |      |       |   |   |   |   |   |
|----------------------------------------------------------------------------------------------------------------------------------|--------|------|-------|---|---|---|---|---|
|                                                                                                                                  | 1      | 2    | 3     | 4 | 5 | 6 | 7 | 8 |
| (B1) My supervisor/manager says a good word when he/she sees a job done according to established patient safety procedures (SEA) | ,822   |      |       |   |   |   |   |   |
| (B2) My supervisor/manager seriously considers staff suggestions for improving patient safety (SEA)                              | ,623   |      |       |   |   |   |   |   |
| (E2) When a mistake is made, but has no potential to harm the patient, how often is this reported? (FER)                         |        | ,864 |       |   |   |   |   |   |
| (E1) When a mistake is made, but is caught and corrected before affecting the patient, how often is this reported? (FER)         |        | ,776 |       |   |   |   |   |   |
| (E3) When a mistake is made that could harm the patient, but does not, how often is this reported? (FER)                         |        | ,776 |       |   |   |   |   |   |
| (D5) Important patient care information is often lost during shift changes. (negatively worded) (HO)                             |        |      | -,662 |   |   |   |   |   |

| Variable                                                                                                                   | Factor |   |       |      |       |      |      |      |
|----------------------------------------------------------------------------------------------------------------------------|--------|---|-------|------|-------|------|------|------|
|                                                                                                                            | 1      | 2 | 3     | 4    | 5     | 6    | 7    | 8    |
| (D3) Things 'fall between the cracks' when transferring patients from one unit to another (negatively worded) (HO)         |        |   | -,621 |      |       |      |      |      |
| (D6) It is often unpleasant to work with staff from other hospital units. (negatively worded) (TWAU)                       |        |   | -,495 |      |       |      |      |      |
| (D7) Problems often occur in the exchange of information across hospital units. (negatively worded) (HO)                   |        |   | -,428 |      |       |      |      |      |
| (A16) Staff worry that mistakes they make are kept in their personnel file. (negatively worded) (NRP)                      |        |   |       | ,578 |       |      |      |      |
| (A8) Staff feel like their mistakes are held (used) against them. (negatively worded) (NPR)                                |        |   |       | ,559 |       |      |      |      |
| (A12) When an incident is reported, it feels like the person is being reported, not the problem. (negatively worded) (NPR) |        |   |       | ,531 |       |      |      |      |
| (D4) There is good cooperation among hospital units that need to work together (TWAU)                                      |        |   |       |      | -,641 |      |      |      |
| (D2) Hospital units do not coordinate well with each other. (negatively worded) (TWAU)                                     |        |   |       |      | -,522 |      |      |      |
| (A1) People support one another in this unit (TWWU)                                                                        |        |   |       |      |       | ,688 |      |      |
| (A3) When a lot of work needs to be done quickly, we work together as a team to get the work done (TWWU)                   |        |   |       |      |       | ,605 |      |      |
| (A4) In this unit, people treat each other with respect (TWWU)                                                             |        |   |       |      |       | ,556 |      |      |
| (C6) Staff are afraid to ask questions when something does not seem right. (negatively worded) (CO)                        |        |   |       |      |       |      | ,615 |      |
| (C4) Staff feel free to question the decisions or actions of those with more authority (CO)                                |        |   |       |      |       |      | ,600 |      |
| (C2) Staff will freely speak up if they see something that may negatively affect patient care (CO)                         |        |   |       |      |       |      | ,524 |      |
| (D1) Hospital management provides a work climate that promotes patient safety (MS)                                         |        |   |       |      |       |      |      | ,677 |
| (D8) The actions of hospital management show that patient safety is a top priority (MS)                                    |        |   |       |      |       |      |      | ,574 |

Extraction Method: Principal Axis Factoring. Rotation Method: Oblimin with Kaiser Normalization.

Rotation converged in 16 iterations. Supervisor/manager expectations and actions promoting safety (SMEA), Organisational learning—continuous improvement (OL), Teamwork within hospital units (TWWU), Teamwork across hospital units (TWAU), Communication openness (CO), Feedback and communication about error (FB), Non-punitive response to error (NPRE), Staffing (S), Hospital management support for patient safety (MS), Hospital handoffs and transitions (HO), Frequency of incident reporting (FER), Overall perceptions of patient safety (OPPS).

Five factors (Factor 2, Factor 3, Factor 4, Factor 6, and Factor 7) have three and more items with loading >0.4. Factor 1, Factor 5, and Factor 8 have two items with very high loading of >0.5 and the items in each factor are theoretically related (Table 2). There are no cross loaded items and there are no items with loading <0.4 and with communalities <0.3 in the solution. The solution is

essentially consistent with all items within each factor theoretically related. Only D6 moved from "Teamwork across units" to "Handoffs and transitions."

**Table 2: Structure, factors loadings and internal consistency of the final EFA solution (Eight factors, 22 items)**

| Number of Factor | Factor                                                       | Heavy loaded items (>0.4) | Number of items | Cronbach's Alpha |
|------------------|--------------------------------------------------------------|---------------------------|-----------------|------------------|
| 1                | Supervisor/Manager Expectations and Actions Promoting Safety | B1-B2                     | 2               | 0.776            |
| 2                | Frequency of Events Reported                                 | E1-E2-E3                  | 3               | 0.858            |
| 3                | Handoffs and Transitions                                     | D3-D5-D6-D7               | 4               | 0.685            |
| 4                | Non-punitive Response to Errors                              | A8-A12-A16                | 3               | 0.604            |
| 5                | Teamwork Across Units                                        | D2-D4                     | 2               | 0.689            |
| 6                | Teamwork Within Units                                        | A1-A3-A4                  | 3               | 0.705            |
| 7                | Communication Openness                                       | C2-C4-C6                  | 3               | 0.601            |
| 8                | Management Support for Patient Safety                        | D1-D8                     | 2               | 0.724            |

Testing the final factor (Eight-factor) model

The optimal Eight-factor model was vigorously examined by conducting two confirmatory analyses initially using the validation half of the dataset (n=640), followed by the whole dataset (n=1280). All estimated parameters indicate a good model fit (Eight factors and 22 items) as reported in Table 3.

**Table 3: CFA Results of Eight factor optimal model (validation sample and whole sample)**

| Eight-factors model | Chi-Square statistic ( $\chi^2$ ) | DF          | CMIN/DF ( $\chi^2/DF$ ) | CFI           | RMR           | SRMR          | RMSEA         | TLI           |
|---------------------|-----------------------------------|-------------|-------------------------|---------------|---------------|---------------|---------------|---------------|
| Validation sample   | 424.9<br>good                     | 181<br>good | 2.3<br>acceptable       | 0.94<br>good  | 0.049<br>good | 0.048<br>good | 0.046<br>good | 0.92<br>good  |
| Whole sample        | 617.8<br>good                     | 181<br>good | 3.4<br>acceptable       | 0.946<br>good | 0.041<br>good | 0.038<br>good | 0.043<br>good | 0.931<br>good |

Chi-square test statistic ( $\chi^2$ ), Chi-squared statistic per one freedom degree ( $\chi^2/DF$ ), the Comparative Fit Index (CFI), Root mean square residuals (RMR), the Standardised Root Mean Square Residual (SRMR), the Root Mean Square Error of Approximation (RMSEA), Tucker-Lewis Index (TLI)

The standardised path coefficients reflecting the strength of the relationship between items and dimensions<sup>58</sup> were found to be generally large (>0.50) and ranged from 0.46 (Communication openness) to 0.89 (Frequency of incidents reported) (see Appendix 3). Therefore, this model was accepted as the optimal model of HSOPSC for the Kuwaiti healthcare setting.

### Reliability

Reliability analysis was performed using the whole sample with Cronbach's Alpha values reported to be  $\geq 0.60$  for all factors. Therefore, the internal consistency was acceptable for the Eight factors solution (Table 2). In order to test the construct validity of the HSOPSC instrument, inter-correlation coefficients with Pearson's  $r$  were calculated between the Eight factors in addition to the two single item outcome measures (patient safety grade and number of incidents reported).

The Pearson's correlation coefficients between scale scores are reported in online appendix 4.

Inter-correlation coefficients ranged between 0.08 and 0.72. All correlation coefficients are significant. The highest correlations were those between "Management support for patient safety" and "Teamwork across units" ( $r=0.722$ ). All eight factors are interrelated to each other. Most of the correlation coefficients indicate a moderate correlation between dimensions. This indicates that no two factors are measuring the same construct.

### Proposed optimal Eight factors model for Kuwaiti data

As shown in Table 4, the proposed optimal model structure includes 8 dimensions and 22 items.

**Table 4: Proposed Eight factors optimal model for Kuwaiti data**

|                                                                                                                           |
|---------------------------------------------------------------------------------------------------------------------------|
| <b>Factor 1: Supervisor/Manager Expectations and Actions Promoting Patient Safety (2 items)</b>                           |
| B1: My supervisor/manager says a good word when he/she sees a job done according to established patient safety procedures |
| B2: My supervisor/manager seriously considers staff suggestions for improving patient safety.                             |
| <b>Factor 2: Frequency of Events Reported (3 items)</b>                                                                   |
| E1: When a mistake is made, but is caught and corrected before affecting the patient, how often is this reported?         |
| E2: When a mistake is made, but has no potential to harm the patient, how often is this reported?                         |
| E3: When a mistake is made that could harm the patient, but does not, how often is this reported?                         |
| <b>Factor 3: Handoffs and Transitions (4 items)</b>                                                                       |
| D3: Things "fall between the cracks" when transferring patients from one unit to another. (negatively worded)             |

|                                                                                                                     |
|---------------------------------------------------------------------------------------------------------------------|
| D5: Important patient care information is often lost during shift changes. (negatively worded)                      |
| D6: It is often unpleasant to work with staff from other hospital units. (negatively worded)                        |
| D7: Problems often occur in the exchange of information across hospital units. (negatively worded)                  |
| <b>Factor 4: Non-punitive Response to Errors (3 items)</b>                                                          |
| A8: Staff feel like their mistakes are held (used) against them. (negatively worded)                                |
| A12: When an incident is reported, it feels like the person is being reported, not the problem. (negatively worded) |
| A16: Staff worry that mistakes they make are kept in their personnel file. (negatively worded)                      |
| <b>Factor 5: Teamwork Across Units (2 items)</b>                                                                    |
| D2: Hospital units do not coordinate well with each other. (negatively worded)                                      |
| D4: There is good cooperation among hospital units that need to work together.                                      |
| <b>Factor 6: Teamwork Within Units (3 items)</b>                                                                    |
| A1: People support one another in this unit.                                                                        |
| A3: When a lot of work needs to be done quickly, we work together as a team to get the work done.                   |
| A4: In this unit, people treat each other with respect.                                                             |
| <b>Factor 7: Communication Openness (3 items)</b>                                                                   |
| C2: Staff will freely speak up if they see something that may negatively affect patient care.                       |
| C4: Staff feel free to question the decisions or actions of those with more authority.                              |
| C6: Staff are afraid to ask questions when something does not seem right. (negatively worded)                       |
| <b>Factor 8: Management Support for Patient Safety (2 items)</b>                                                    |
| D1: Hospital management provides a work climate that promotes patient safety.                                       |
| D8: The actions of hospital management show that patient safety is a top priority.                                  |

## DISCUSSION

This psychometric evaluation is the first reported validation study of a standardised safety climate measure in a Kuwaiti healthcare setting. The psychometric properties of the HSOPSC questionnaire were assessed and an optimal model for assessing patient safety climate in Kuwaiti hospitals was constructed. The final questionnaire contains 22 safety climate items (variables) that measure eight safety climate factors. The optimal model's psychometric properties (including validity and reliability) were good with all items loading strongly ( $>0.40$ ) onto one factor and all items, within each factor, were theoretically related.

Our results are in line with other studies investigating the psychometric properties of the original HSOPSC questionnaire. The suitability of the original HSOPSC model for Kuwaiti data was tested and results revealed an unsatisfactory fit<sup>59</sup>. Different international studies<sup>27 31 60 61</sup> reported similar findings. This finding is in contrast with other studies that assessed patient safety climate by using

1  
2  
3 the original HSOPSC questionnaire <sup>59</sup> in hospitals without examining the reliability and validity  
4 of the questionnaire in a different context <sup>62-68</sup>  
5  
6  
7

8  
9 Various underlying factor structures were identified as optimal factor models. The original 12  
10 factor model was replicated in Belgian <sup>6</sup>, Portuguese <sup>69</sup> Brazilian<sup>70</sup> and Scottish data <sup>71</sup>. Other  
11 studies reported 11 factor models for Dutch <sup>30</sup>, Arabic <sup>61</sup>, Croatian <sup>72</sup> and Norwegian data <sup>73</sup>; 10  
12 factor models for French <sup>28</sup>, Turkish <sup>26</sup>, Chinese <sup>74</sup> and Brazilian data <sup>75</sup>; 9 factor models for UK <sup>31</sup>  
13 and Slovene data <sup>76</sup>; Eight factor models for Swiss <sup>27</sup>, Saudi <sup>60</sup>, Kosovo <sup>77</sup> and Kuwaiti data. This  
14 discrepancy in results could be attributed to differences in employing survey methods and  
15 psychometric analytical techniques, in addition to the various modifications made to adapt the  
16 original instrument to different healthcare settings <sup>71</sup>. Neglect of crucial elements, including  
17 context, processes and actors involved, when attempting to adapt an instrument in a different  
18 setting might lead to conflicting results and might weaken the validity of the instrument <sup>78</sup>. Thus,  
19 the original HSOPSC will clearly be limited when used in other contexts without proper  
20 assessment of its psychometric properties.  
21  
22  
23  
24  
25  
26  
27  
28

29 The optimal model of our study is in line with other international studies <sup>31 60</sup>. Four dimensions  
30 were either dropped or merged with other factors into a single dimension. In our study, the same  
31 dimensions reported low reliability using the original HSOPSC in addition to other international  
32 studies <sup>31 60 79</sup>. The optimal model was confirmed using CFA with good model fit indices. This was  
33 consistent with the CFA results of the USA <sup>59</sup>, Saudi Arabia <sup>60</sup>, Palestine <sup>61</sup>, UK <sup>31</sup> and Scotland <sup>71</sup>  
34 optimal models.  
35  
36  
37  
38  
39  
40

41 Considering all of this evidence, it seems that the original HSOPSC questionnaire <sup>59</sup> does not  
42 appear to perform well in different countries. Survey instruments that are designed for particular  
43 settings are tailored to meet the unique characteristics and contexts of the local setting and  
44 population. In the case of the HSOPSC, a number of the reported adaptations have performed less  
45 well than the original tool <sup>28 31 73 74 80</sup>. This might be due to the contextual specificity of the construct  
46 of safety culture <sup>81</sup>. Other factors include unique country characteristics, types of health systems  
47 and settings, staff groups, and cultural differences <sup>27 82</sup>. Hedsköld, et al. <sup>78</sup> pointed out that such  
48 differences might weaken the validity of the instrument.  
49  
50  
51  
52  
53  
54  
55  
56  
57  
58  
59  
60

1  
2  
3  
4 In a review of quantitative patient safety culture instruments, it was concluded that all of the  
5 surveys designed for general administration to hospital personnel addressed three common  
6 dimensions: management support and commitment to safety, communication openness and  
7 teamwork Singla, et al. <sup>11</sup>. They suggested that these common dimensions might be considered  
8 “core dimensions” of patient safety culture. In addition, a number of dimensions seem to be  
9 common among optimal factor models across different countries.  
10  
11  
12  
13

14  
15 Factor structure of the optimal model of our study compared with optimal models that were  
16 developed in Saudi Arabia, Palestine, England, Scotland, Netherlands, Turkey and Switzerland in  
17 addition to the original USA HSOPSC questionnaire <sup>59</sup> is shown in online appendix 5. This  
18 comparison is aimed at identifying a common set of patient safety culture dimensions across  
19 different countries.  
20  
21  
22  
23

24  
25 Six studies reported different dimensions combined into one dimension. A significant degree of  
26 overlap in the content of the safety culture dimensions exists. As a result, included items in certain  
27 dimensions tend to load onto differently labeled dimensions. “Feedback and communication about  
28 error” and “Communication openness” were grouped into one dimension in the Palestinian, Swiss  
29 and Scottish studies respectively <sup>27 61 79</sup>. This result is expected as both dimensions are closely  
30 related. Feedback and communication with staff about errors and discussing ways to prevent them  
31 are linked to allowing staff to freely speak up, if they see something that might negatively affect  
32 patient care.  
33  
34  
35  
36  
37  
38  
39  
40

41 Cox and Flin <sup>1</sup> suggest that the nature of safety climate is “context-dependent.” Keiser <sup>83</sup> argues  
42 that since safety climate measures include both general and contextualized items, excluding  
43 contextual measures might provide a rather deficient evaluation of the underlying safety climate  
44 construct. Thus, research currently supports the idea of integrating both qualitative and quantitative  
45 methods in developing a culturally appropriate instrument as standard approaches that exclusively  
46 rely on translation and quantitative validation may not be sufficient to produce an instrument that  
47 is applicable to the local context <sup>74</sup>. As a result, the adopted tool will be able to reflect important  
48 safety climate themes that are specific to the local healthcare context.  
49  
50  
51  
52  
53  
54  
55  
56  
57  
58  
59  
60



1  
2  
3  
4 A number of common dimensions that were emerging rather consistently across international  
5 settings despite the lack of confirmation of the original factor structure of the HSOPSC in  
6 numerous studies. Those dimensions include: management support for patient safety, supervisors'  
7 action promoting patient safety, teamwork within and across units, handoffs and transitions, non-  
8 punitive response to error, frequency of incidents reported, communication openness and  
9 organisational learning.  
10  
11  
12  
13  
14

15  
16 The item composition of each factor of the optimal model of our study was compared with optimal  
17 models that were developed in Saudi Arabia, Palestine, England, Netherlands, Turkey and  
18 Switzerland in addition to the original USA HSOPSC questionnaire<sup>59</sup>. This comparison is aimed  
19 at identifying a common set of patient safety climate items across different countries (see  
20 Appendix 6). The different adaptations of the HSOPSC did not confirm the original factor  
21 structure of the HSOPSC<sup>59</sup>. Still, some dimensions corresponded to the ones proposed in the  
22 original HSOPSC model and items were repeated across the different studies. It should be noted  
23 that not all studies reported their optimum factor model structure. As a result, this created a  
24 difficulty in identifying the structure of the common dimensions across different countries.  
25  
26  
27  
28  
29  
30  
31

## 32 **CONCLUSION**

33  
34 This is the first validation study of a patient safety climate questionnaire conducted in a Kuwaiti  
35 healthcare setting. The results clearly indicate the need for caution when using the original version  
36 of the HSOPSC questionnaire<sup>59</sup> and highlight the importance of appropriate validation of safety  
37 climate surveys before applying them to different populations and healthcare contexts than those  
38 in which they were originally developed. The study also shows the original composition of the  
39 HSOPSC dimensions was not confirmed in most studies. When compared to the USA, the  
40 HSOPSC questionnaire may be assessing different dimensions of safety culture across different  
41 countries including Kuwait<sup>59</sup>. More work is needed on cross-cultural investigations of differences  
42 in dimensionality to allow comparisons of healthcare safety climate results at an international level  
43  
44  
45  
46  
47  
48  
49  
50  
51  
52  
53  
54  
55  
56  
57  
58  
59  
60  
27 41. This study provided comparative data on the use of the HSOPSC questionnaire  
internationally and nine common dimensions and items were identified when comparing the  
different studies that reported their optimum models. The optimal factor model that was  
constructed in this study can be used as a basis for measuring patient safety climate in Kuwaiti



1  
2  
3 hospitals and in evaluating changes in safety climate over time as part of patient safety  
4 improvement initiatives.  
5  
6  
7

8  
9 **Acknowledgement:**

10 We would like to thank every MOH staff member who took time to participate in this project  
11 despite their workload and endless commitments in order to contribute to a safer healthcare.  
12  
13

14 **Funding:**

15 None.  
16

17 **Competing interests:**

18 None.  
19

20 **Authors' contributions:**

21 GA, PB and JM made considerable contributions to conception and design of the psychometric  
22 evaluation.  
23

24 GA completed the psychometric assessment and development of the final eight-factor model.  
25  
26

27 GA was involved in drafting the manuscript while JM and PB have done revising the drafts.  
28

29 All authors have given final approval of the version to be published and agreed to be accountable  
30 for all aspects of the work in ensuring that questions related to the accuracy or integrity of any part  
31 of the work are appropriately investigated and resolved.  
32  
33

34 All authors read and approved the final manuscript.  
35

36 **Ethics approval:**

37 Ethical approval was sought from the Medical, Veterinary and Life Sciences College ethics  
38 committee of the University of Glasgow in Scotland and the Medical and Health Sciences  
39 Research Committee of the Ministry of Health in Kuwait.  
40  
41  
42

43 **Provenance and peer review:**

44 Not commissioned; externally peer reviewed.  
45

46 **Data sharing statement:**

47 Data are available. Please contact corresponding author.  
48  
49  
50  
51  
52  
53  
54  
55  
56  
57  
58  
59  
60

## REFERENCES

1. Cox S, Flin R. Safety culture: philosopher's stone or man of straw? *Work & stress* 1998;12(3):189-201.
2. Perrow C. A personal note on normal accidents. *Organization & environment* 2004;17(1):9-14.
3. Reason J. Combating omission errors through task analysis and good reminders. *Quality and Safety in Health Care* 2002;11(1):40-44.
4. Mearns KJ, Flin R. Assessing the state of organizational safety—culture or climate? *Current Psychology* 1999;18(1):5-17.
5. Flin R, Burns C, Mearns K, et al. Measuring safety climate in health care. *Qual Saf Health Care* 2006;15:109 - 15.
6. Hellings J, Schrooten W, Klazinga N, et al. Challenging patient safety culture: survey results. *International Journal of Health Care Quality Assurance* 2007;20(7):620-32.
7. Smits M, Groenewegen PP, Timmermans DRM, et al. The nature and causes of unintended events reported at ten emergency departments. *BMC Emergency Medicine* 2009;9:16.
8. Blegen MA, Gearhart S, O'Brien R, et al. AHRQ's hospital survey on patient safety culture: psychometric analyses. *Journal of Patient Safety* 2009;5(3):139-44.
9. Lee T, Harrison K. Assessing safety culture in nuclear power stations. *Safety science* 2000;34(1):61-97.
10. Colla J, Bracken A, Kinney L, et al. Measuring patient safety climate: a review of surveys. *Qual Saf Health Care* 2005;14:364 - 66.
11. Singla AK, Kitch BT, Weissman JS, et al. Assessing patient safety culture: a review and synthesis of the measurement tools. *Journal of Patient Safety* 2006;2(3):105-15.
12. Fleming M. Patient safety culture measurement and improvement: a “how to” guide. *Healthc Q* 2005;8(Spec No):14-19.
13. Jackson J, Sarac C, Flin R. Hospital safety climate surveys: measurement issues. *Current Opinion in Critical Care* 2010;16(6):632-8.
14. Halligan M, Zecevic A. Safety culture in healthcare: a review of concepts, dimensions, measures and progress. *BMJ quality & safety* 2011;20(4):338-43.
15. Pumar-Méndez MJ, Attree M, Wakefield A. Methodological aspects in the assessment of safety culture in the hospital setting: A review of the literature. *Nurse education today* 2014;34(2):162-70.
16. Sammer CE, Lykens K, Singh KP, et al. What is patient safety culture? A review of the literature. *Journal of Nursing Scholarship* 2010;42(2):156-65.
17. Flin R. Measuring safety culture in healthcare: A case for accurate diagnosis. *Safety Science* 2007;45:653-67.

18. Nieva VF, Sorra J. Safety culture assessment: a tool for improving patient safety in healthcare organizations. *Qual Saf Health Care* 2003;12 Suppl 2:ii17-23.
19. Alabdaly S. About the scandal of fatal errors in Adan Hospital. *Alaan Newspaper* 2009 11 January 2009.
20. Salama F. Medical errors kill a quarter of a million Americans a year. *Alqabas newspaper* 2016 5 May 2016.
21. Sami A. Medical errors, an obsession that worries everyone. *Aljarida newspaper* 2015 3 September 2015.
22. Sorra JS, Dyer N. Multilevel psychometric properties of the AHRQ hospital survey on patient safety culture. *BMC Health Services Research* 2010;10(1):199.
23. Sorra J, Nieva V. Hospital Survey on Patient Safety Culture. AHRQ Publication No. 04-0041. Rockville, MD: Agency for Healthcare Research and Quality, September 2004, 2007.
24. Sorra J, Famolaro T, Dyer MN, et al. Hospital Survey on Patient Safety Culture: 2010 User Comparative Database Report. Rockville, MD, 2010.
25. Measuring hospital safety culture: Testing the HSOPSC scale. Proceedings of the Human Factors and Ergonomics Society; 2010.
26. Bodur S, Filiz E. Validity and reliability of Turkish version of "hospital Survey on Patient Safety Culture" and perception of patient safety in public hospitals in Turkey. *BMC Health Services Research* 2010;10
27. Pfeiffer Y, Manser T. Development of the German version of the Hospital Survey on Patient Safety Culture: Dimensionality and psychometric properties. *Safety Science* 2010;48(10):1452-62.
28. Perneger TV, Staines A, Kundig F. Internal consistency, factor structure and construct validity of the French version of the Hospital Survey on Patient Safety Culture. *BMJ quality & safety* 2014;23(5):389-97.
29. Haugen AS, Sjøfteland E, Eide GE, et al. Patient safety in surgical environments: cross-countries comparison of psychometric properties and results of the Norwegian version of the Hospital Survey on Patient Safety. *BMC health services research* 2010;10(1):1.
30. Smits M, Christiaans-Dingelhoff I, Wagner C, et al. The psychometric properties of the 'Hospital Survey on Patient Safety Culture' in Dutch hospitals. *BMC Health Services Research* 2008;8:230.
31. Waterson P, Griffiths P, Stride C, et al. Psychometric properties of the Hospital Survey on Patient Safety Culture: findings from the UK. *Quality and Safety in Health Care* 2010;19(5):e2-e2.
32. Agency for Healthcare Research and Quality. International Use of the Surveys on Patient Safety Culture Rockville, MD2015 [Available from: <http://www.ahrq.gov/professionals/quality-patient-safety/patientsafetyculture/pscintusers.html>] accessed 3 February 2016.

- 1
- 2
- 3
- 4 33. Gerrish K, Lacey A. The research process in nursing. Chichester: John Wiley & Sons 2010.
- 5
- 6 34. Sarantakos S. Social research: Palgrave Macmillan 2012.
- 7
- 8 35. Tinsley HE, Tinsley DJ. Uses of factor analysis in counseling psychology research. *Journal of*  
9 *counseling psychology* 1987;34(4):414.
- 10
- 11 36. Tabachnick BG, Fidell LS. Using multivariate statistics. Boston, MA: Allyn & Bacon 2007.
- 12
- 13 37. Cho YI, Johnson TP, VanGeest JB. Enhancing surveys of health care professionals: a meta-  
14 *analysis of techniques to improve response. Evaluation & the health professions*  
15 2013;36(3):382-407.
- 16
- 17 38. McLeod CC, Klabunde CN, Willis GB, et al. Health care provider surveys in the United States,  
18 2000–2010: a review. *Evaluation & the health professions* 2013;36(1):106-26.
- 19
- 20 39. Sorra J, Gray L, Streagle S. AHRQ Hospital Survey on Patient Safety Culture: User's Guide.  
21 Rockville, MD: Agency for Healthcare Research and Quality., 2016.
- 22
- 23 40. Allison PD. Missing data techniques for structural equation modeling. *Journal of abnormal*  
24 *psychology* 2003;112(4):545.
- 25
- 26 41. Hutchinson A, Cooper K, Dean J, et al. Use of a safety climate questionnaire in UK health  
27 *care: factor structure, reliability and usability. Quality and Safety in Health Care*  
28 2006;15(5):347-53.
- 29
- 30 42. Hill T, Lewicki P, Lewicki P. Statistics: methods and applications: a comprehensive reference  
31 *for science, industry, and data mining: StatSoft, Inc. 2006.*
- 32
- 33 43. Gerbing DW, Hamilton JG. Viability of exploratory factor analysis as a precursor to  
34 *confirmatory factor analysis. Structural Equation Modeling: A Multidisciplinary Journal*  
35 1996;3(1):62-72.
- 36
- 37 44. Henson RK, Roberts JK. Use of exploratory factor analysis in published research common  
38 *errors and some comment on improved practice. Educational and Psychological*  
39 *measurement* 2006;66(3):393-416.
- 40
- 41 45. Pett MA, Lackey NR, Sullivan JJ. Making sense of factor analysis: The use of factor analysis  
42 *for instrument development in health care research. Thousand Oaks, CA: Sage*  
43 *Publications 2003.*
- 44
- 45 46. Kline RB. Principles and practice of structural equation modeling. New York: Guilford  
46 *publications 2015.*
- 47
- 48 47. De Vellis RF, Dancer LS. Scale development: theory and applications. *Journal of Educational*  
49 *Measurement* 1991;31(1):79-82.
- 50
- 51 48. Field A. Discovering statistics using SPSS. London: Sage publications 2009.
- 52
- 53 49. Suhr D. Reliability, exploratory & confirmatory factor analysis for the scale of athletic  
54 *priorities. Diambil pada tanggal 2003;2:274-28.*
- 55
- 56 50. Kaiser HF. An index of factorial simplicity. *Psychometrika* 1974;39(1):31-36.
- 57
- 58
- 59
- 60

- 1
- 2
- 3
- 4 51. Hutcheson GD, Sofroniou N. The multivariate social scientist: Introductory statistics using
- 5 generalized linear models: Sage 1999.
- 6
- 7 52. Amos (Version 23.0) [Computer Program]
- 8 [program]. Chicago: SPSS, 2014.
- 9
- 10 53. Hu L, Bentler P. Cutoff criteria for fit indexes in covariance structure analysis: Conventional
- 11 criteria versus new alternatives. *Structural Equation Modelling* 1999;6(1):1 - 55.
- 12
- 13 54. Ullman JB. Structural equation modeling: Reviewing the basics and moving forward. *Journal*
- 14 *of personality assessment* 2006;87(1):35-50.
- 15
- 16 55. Cattell RB. The scree test for the number of factors. *Multivariate behavioral research*
- 17 1966;1(2):245-76.
- 18
- 19 56. Beavers AS, Lounsbury JW, Richards JK, et al. Practical considerations for using exploratory
- 20 factor analysis in educational research. *Practical assessment, research & evaluation*
- 21 2013;18(6):1-13.
- 22
- 23 57. Exploratory or confirmatory factor analysis? SAS Users Group International Conference
- 24 2006; Cary: SAS Institute, Inc.
- 25
- 26 58. Kline P. An easy guide to factor analysis. London; Newyork, N.Y.: Routledge 2014.
- 27
- 28 59. Sorra J, Nieva V. Hospital Survey on Patient Safety Culture. Rockville, MD: Agency for
- 29 Healthcare Research and Quality (AHRQ), 2004.
- 30
- 31 60. Alonazi MS. An evaluation of a patient safety culture tool in Saudi Arabia. The University of
- 32 Sheffield, 2011.
- 33
- 34 61. Najjar S, Hamdan M, Baillien E, et al. The Arabic version of the hospital survey on patient
- 35 safety culture: a psychometric evaluation in a Palestinian sample. *BMC health services*
- 36 *research* 2013;13(1):1.
- 37
- 38 62. Al-Awa B, Al Mazrooa A, Rayes O, et al. Benchmarking the post-accreditation patient safety
- 39 culture at King Abdulaziz University Hospital. *Annals of Saudi medicine* 2012;32(2)
- 40
- 41 63. Alahmadi H. Assessment of patient safety culture in Saudi Arabian hospitals. *Quality and*
- 42 *Safety in Health Care* 2010;19(5):1-5.
- 43
- 44 64. El-Jardali F, Jaafar M, Dimassi H, et al. The current state of patient safety culture in
- 45 Lebanese hospitals: a study at baseline. *International Journal for Quality in Health Care*
- 46 2010;22(5):386-95.
- 47
- 48 65. El-Jardali F, Dimassi H, Jamal D, et al. Predictors and outcomes of patient safety culture in
- 49 hospitals. *BMC Health Services Research* 2011;11(1):1.
- 50
- 51 66. Al-Mandhari A, Al-Zakwani I, Al-Kindi M, et al. Patient safety culture assessment in Oman.
- 52 *Oman medical journal* 2014;29(4):264-71.
- 53
- 54 67. Bahrami MA, Montazeralfaraj R, Chalak M, et al. Patient safety culture challenges: Survey
- 55 results of iranian educational hospitals. *Middle East J Sci Res* 2013;14(5):641-9.
- 56
- 57
- 58
- 59
- 60

- 1  
2  
3  
4 68. El-Jardali F, Sheikh F, Garcia NA, et al. Patient safety culture in a large teaching hospital in  
5 Riyadh: baseline assessment, comparative analysis and opportunities for improvement.  
6 *BMC health services research* 2014;14(1):1.  
7
- 8 69. Eiras M, Escoval A, Grillo IM, et al. The hospital survey on patient safety culture in  
9 Portuguese hospitals: instrument validity and reliability. *International Journal of Health  
10 Care Quality Assurance* 2014;27(2):111-22.  
11
- 12 70. Andrade LELd, Melo LOMd, Silva IGd, et al. Adaptation and validation of the Hospital Survey  
13 on Patient Safety Culture in an electronic Brazilian version. *Epidemiologia e Serviços de  
14 Saúde* 2017;26(3):455-68.  
15
- 16 71. Sarac C, Flin R, Mearns K, et al. Hospital survey on patient safety culture: psychometric  
17 analysis on a Scottish sample. *BMJ Quality & Safety* 2011;20(10):842-8.  
18
- 19 72. Brborovic H, Sklebar I, Brborovic O, et al. Development of a Croatian version of the US  
20 hospital survey on patient safety culture questionnaire: Dimensionality and  
21 psychometric properties. *Postgraduate Medical Journal* 2014;90(1061):125-32.  
22
- 23 73. Haugen AS, Softeland E, Eide GE, et al. Patient safety in surgical environments: cross-  
24 countries comparison of psychometric properties and results of the Norwegian version  
25 of the Hospital Survey on Patient Safety. *BMC Health Services Research* 2010;10:279.  
26
- 27 74. Zhu J, Li L, Zhao H, et al. Development of a patient safety climate survey for Chinese  
28 hospitals: Cross-national adaptation and psychometric evaluation. *BMJ Quality and  
29 Safety* 2014;23(10):847-56.  
30
- 31 75. Reis CT, Laguardia J, Vasconcelos AGG, et al. Reliability and validity of the Brazilian version  
32 of the Hospital Survey on Patient Safety Culture (HSOPSC): a pilot study. *Cadernos de  
33 Saúde Pública* 2016;32(11)  
34
- 35 76. Robida A. Hospital Survey on Patient Safety Culture in Slovenia: a psychometric evaluation.  
36 *International Journal for Quality in Health Care* 2013;25(4):469-75.  
37
- 38 77. Brajshori N, Behrens J. Translation, Cultural Adaption and Validation of Hospital Survey on  
39 Patient Safety Culture in Kosovo. *Open Journal of Nursing* 2016;6(06):483.  
40
- 41 78. Hedsköld M, Pukk-Härenstam K, Berg E, et al. Psychometric properties of the hospital survey  
42 on patient safety culture, HSOPSC, applied on a large Swedish health care sample. *BMC  
43 Health Services Research* 2013;13  
44
- 45 79. Saraç Ç. Safety climate in acute hospitals. University of Aberdeen, 2011.  
46
- 47 80. Nie Y, Mao X, Cui H, et al. Hospital survey on patient safety culture in China. *BMC Health  
48 Services Research* 2013;13  
49
- 50 81. Coyle IR, Sleeman SD, Adams N. Safety climate. *Journal of Safety Research* 1995;26(4):247-  
51 54.  
52
- 53 82. Ginsburg L, Gilin D, Tregunno D, et al. Advancing measurement of patient safety culture.  
54 *Health services research* 2009;44(1):205-24.  
55  
56  
57  
58  
59

1  
2  
3  
4  
5  
6  
7  
8  
9  
10  
11  
12  
13  
14  
15  
16  
17  
18  
19  
20  
21  
22  
23  
24  
25  
26  
27  
28  
29  
30  
31  
32  
33  
34  
35  
36  
37  
38  
39  
40  
41  
42  
43  
44  
45  
46  
47  
48  
49  
50  
51  
52  
53  
54  
55  
56  
57  
58  
59  
60

83. Keiser NL. An Empirical Test of Context-Specific Safety Climate Measurement: A Comparison of Five Research Laboratory Safety Climate Measures to a General Measure of Safety Climate [Master's Thesis]. Texas A & M University, 2015.

For peer review only



**Box 1: HSOPSC patient safety culture dimensions and definitions**<sup>39</sup>

| <b>Patient Safety Culture Composite</b>                              | <b>Definition: The extent to which...</b>                                                                                                                                                                                  |
|----------------------------------------------------------------------|----------------------------------------------------------------------------------------------------------------------------------------------------------------------------------------------------------------------------|
| Communication Openness                                               | Staff freely speak up if they see something that may negatively affect a patient and feel free to question those with more authority.                                                                                      |
| Feedback and Communication About Error                               | Staff are informed about errors that happen, are given feedback about changes implemented, and discuss ways to prevent errors.                                                                                             |
| Frequency of Events Reported                                         | Mistakes of the following types are reported: (1) mistakes caught and corrected before affecting the patient, (2) mistakes with no potential to harm the patient, and (3) mistakes that could harm the patient but do not. |
| Handoffs and Transitions                                             | Important patient care information is transferred across hospital units and during shift changes.                                                                                                                          |
| Management Support for Patient Safety                                | Hospital management provides a work climate that promotes patient safety and shows that patient safety is a top priority.                                                                                                  |
| Non-punitive Response to Error                                       | Staff feel that their mistakes and event reports are not held against them and that mistakes are not kept in their personnel file.                                                                                         |
| Organizational Learning—Continuous Improvement                       | Mistakes have led to positive changes and changes are evaluated for effectiveness.                                                                                                                                         |
| Overall Perceptions of Patient Safety                                | Procedures and systems are good at preventing errors and there is a lack of patient safety problems.                                                                                                                       |
| Staffing                                                             | There are enough staff to handle the workload and work hours are appropriate to provide the best care for patients.                                                                                                        |
| Supervisor/Manager Expectations and Actions Promoting Patient Safety | Supervisors/managers consider staff suggestions for improving patient safety, praise staff for following patient safety procedures, and do not overlook patient safety problems.                                           |
| Teamwork Across Units                                                | Hospital units cooperate and coordinate with one another to provide the best care for patients.                                                                                                                            |
| Teamwork Within Units                                                | Staff support each other, treat each other with respect, and work together as a team.                                                                                                                                      |



1  
2  
3  
4  
5  
6  
7  
8  
9  
10  
11  
12  
13  
14  
15  
16  
17  
18  
19  
20  
21  
22  
23  
24  
25  
26  
27  
28  
29  
30  
31  
32  
33  
34  
35  
36  
37  
38  
39  
40  
41  
42  
43  
44  
45  
46  
47  
48  
49  
50  
51  
52  
53  
54  
55  
56  
57  
58  
59  
60

**Figure legends:**

**Figure 1 title: Scree plot of the final EFA solution (Eight factors, 22 items)**

**Box 1: HSOPSC patient safety culture dimensions and definitions 39**

For peer review only

1  
2  
3  
4  
5  
6  
7  
8  
9  
10  
11  
12  
13  
14  
15  
16  
17  
18  
19  
20  
21  
22  
23  
24  
25  
26  
27  
28  
29  
30  
31  
32  
33  
34  
35  
36  
37  
38  
39  
40  
41  
42  
43  
44  
45  
46  
47  
48  
49  
50  
51  
52  
53  
54  
55  
56  
57  
58  
59  
60

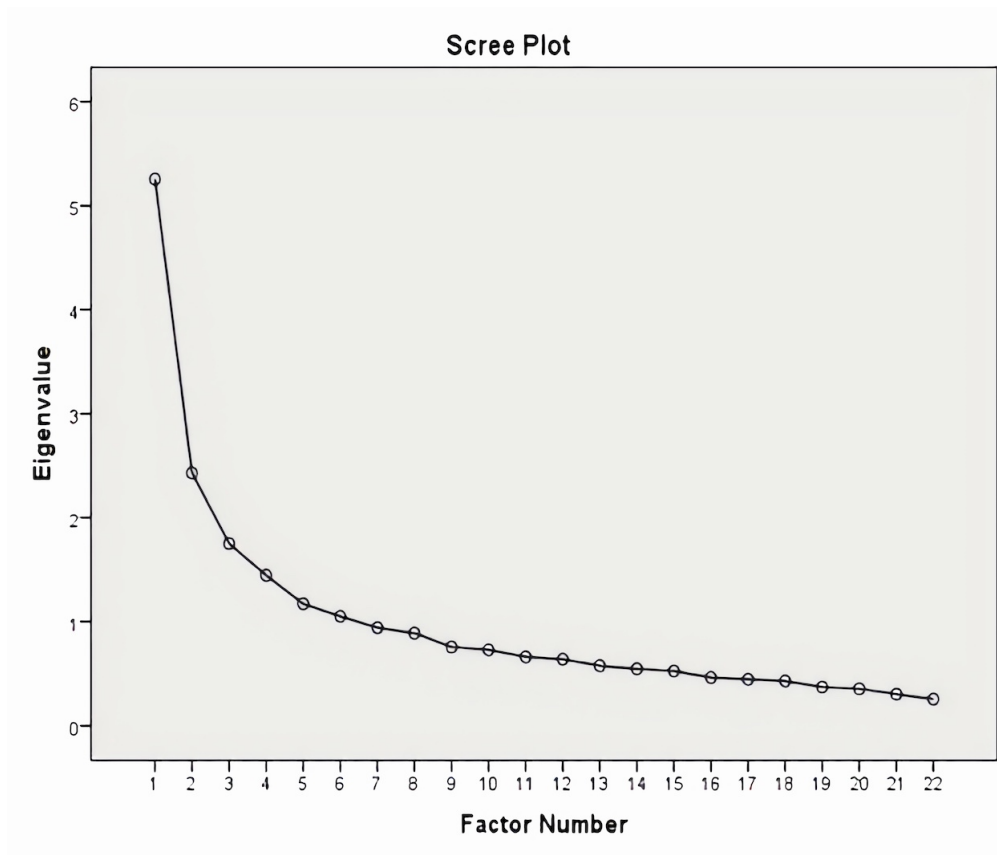

Scree plot of the final EFA solution (Eight factors, 22 items)

105x90mm (300 x 300 DPI)

**Appendix 1: Professional and personal characteristics of study respondents (n=1,310)**

| <b>Variable</b>        | <b>Category</b>                             | <b>Frequency (n)</b> | <b>Percentage (%)</b> |
|------------------------|---------------------------------------------|----------------------|-----------------------|
| Staff Position         | Assistant Nurse                             | 30                   | 2.4                   |
|                        | Nurse                                       | 697                  | 55.0                  |
|                        | Head nurse/Nurse manager                    | 27                   | 2.1                   |
|                        | Unit Assistant/Clerk                        | 4                    | 0.3                   |
|                        | Attending/Staff Physician                   | 227                  | 17.9                  |
|                        | Resident Physician/Physician in training    | 41                   | 3.2                   |
|                        | Pharmacist                                  | 21                   | 1.7                   |
|                        | Dietician                                   | 10                   | 0.8                   |
|                        | Respiratory Therapist                       | 3                    | 0.2                   |
|                        | Physical, Occupational, or Speech Therapist | 18                   | 1.4                   |
|                        | Technician                                  | 176                  | 13.9                  |
|                        | Management                                  | 13                   | 1.0                   |
| Gender                 | Male                                        | 479                  | 37.2                  |
|                        | Female                                      | 808                  | 62.8                  |
| Direct Patient Contact | Yes                                         | 1112                 | 88.5                  |
|                        | No                                          | 144                  | 11.5                  |

**Appendix 2:**  
**Conclusion from the solutions with different numbers of the factors (12- 9-8-7-10-11)**

| Step | Number of extracted factors | Number of the satisfactory factors | Total variance explained by extracted factors | Items not loading      | Items which have low communalities (<0.3)       | Items which have low loadings (<0.4)         |
|------|-----------------------------|------------------------------------|-----------------------------------------------|------------------------|-------------------------------------------------|----------------------------------------------|
| 1    | 12                          | 8                                  | 45                                            | A5- A11- A15- A17      | A5-A7-A9-A10- A11-A15-A17                       | A13- B3-D9- A6- C1-C5- A10- A7- D11- A18- C3 |
| 4    | 9                           | 7                                  | 41.0                                          | A5 - A9- A15- A17-A7   | A2-A5-A7-A9- A10-A15-A17                        | D9- B3- C5- A10- A2-A11                      |
| 5    | 8                           | 6                                  | 39.2                                          | A5-A15-A17-A9          | A2 - A5- A7- A9- A10- A11-A15- A17              | A13-D9- C5-A6- B3- A10-A7- A2- A11           |
| 6    | 7                           | 5                                  | 37.4                                          | A11-A5-A7-A9- A15- A17 | A2 - A5- A7- A9- A10 - A11- A15- A17- B3 -C3-D6 | C3-A18-A13- C1- A2- B4-B3-A10                |
| 7    | 11                          | 9                                  | 43.8                                          | A5-A7- A17             | A5- A7- A9- A10- A11- A15- A17- D6              | B3-D9- A6- A10- A9-A13- C5- A7- A11          |
| 8    | 10                          | 9                                  | 42.6                                          | A5-A7- A17 A9          | A5 - A7- A9- A10 - A11- A15- A17- D6            | A13-D9- C5- A10- A11                         |

An investigation of five possible solutions was undertaken in steps 4-8 to explore the number of factors that could be extracted. The initial solution with 12 factors demonstrates that 8 factors could fit the 42 safety climate items. The 9 Factors solution demonstrates that 7 factors could fit the 42 safety climate items. The 8 Factors solution demonstrates that 6 factors could fit the 42 safety climate items. The 11 Factors solution demonstrates that 9 factors could fit the 42 safety climate items. The 10 Factors solution demonstrates that 9 factors fit the 42 safety climate items. The summary results of the six solutions including the initial solution are displayed in the above table. The comparison of the different solutions suggests that the 8 Factors solution is most

1  
2  
3 appropriate (four items without loadings, the initial solution with 12 factors indicates that 8  
4 factors is satisfactory, only one factor is without strongly loaded items).

5  
6 The optimal model is an Eight Factor model with 22 safety climate questionnaire items (20 items  
7 were excluded) that explains about 50.2% of the total variance. All factor loadings are within the  
8 range of 0.426-0.866. Five factors (Factor 2, Factor 3, Factor 4, Factor 6, and Factor 7) have  
9 three or more items with loadings  $>0.40$ . Factor 1, Factor 5, and Factor 8 have two items with  
10 very high loading  $>0.50$  and acceptable theoretical basis. There are no cross loaded items and  
11 there are no items with loadings  $<0.40$  in the solution. The solution is essentially consistent with  
12 the theoretical pattern. All factors consist of two to four items and all items within each factor are  
13 theoretically related. Only D6 moved from "Teamwork across units" into "Handoffs and  
14 Transitions." It should be noted that "Overall perceptions of patient safety", "Organisational  
15 learning—Continuous improvement", "Staffing" and "Feedback and communication about  
16 error" have no items in the final 8 factor solution.

17  
18 In summary, the optimal Eight Factor model shows good psychometric properties with no cross  
19 loaded items and there are no items with loadings  $<0.40$  in the solution. All factors consist of two  
20 to four items and all items within each factor are theoretically related. The optimal model of our  
21 study was confirmed by using CFA.  
22  
23  
24  
25  
26  
27  
28  
29  
30  
31  
32  
33  
34  
35  
36  
37  
38  
39  
40  
41  
42  
43  
44  
45  
46  
47  
48  
49  
50  
51  
52  
53  
54  
55  
56  
57  
58  
59  
60

**Appendix 3:**  
**HSOPSC Eight factor model in Kuwait and individual item standardised path coefficients**

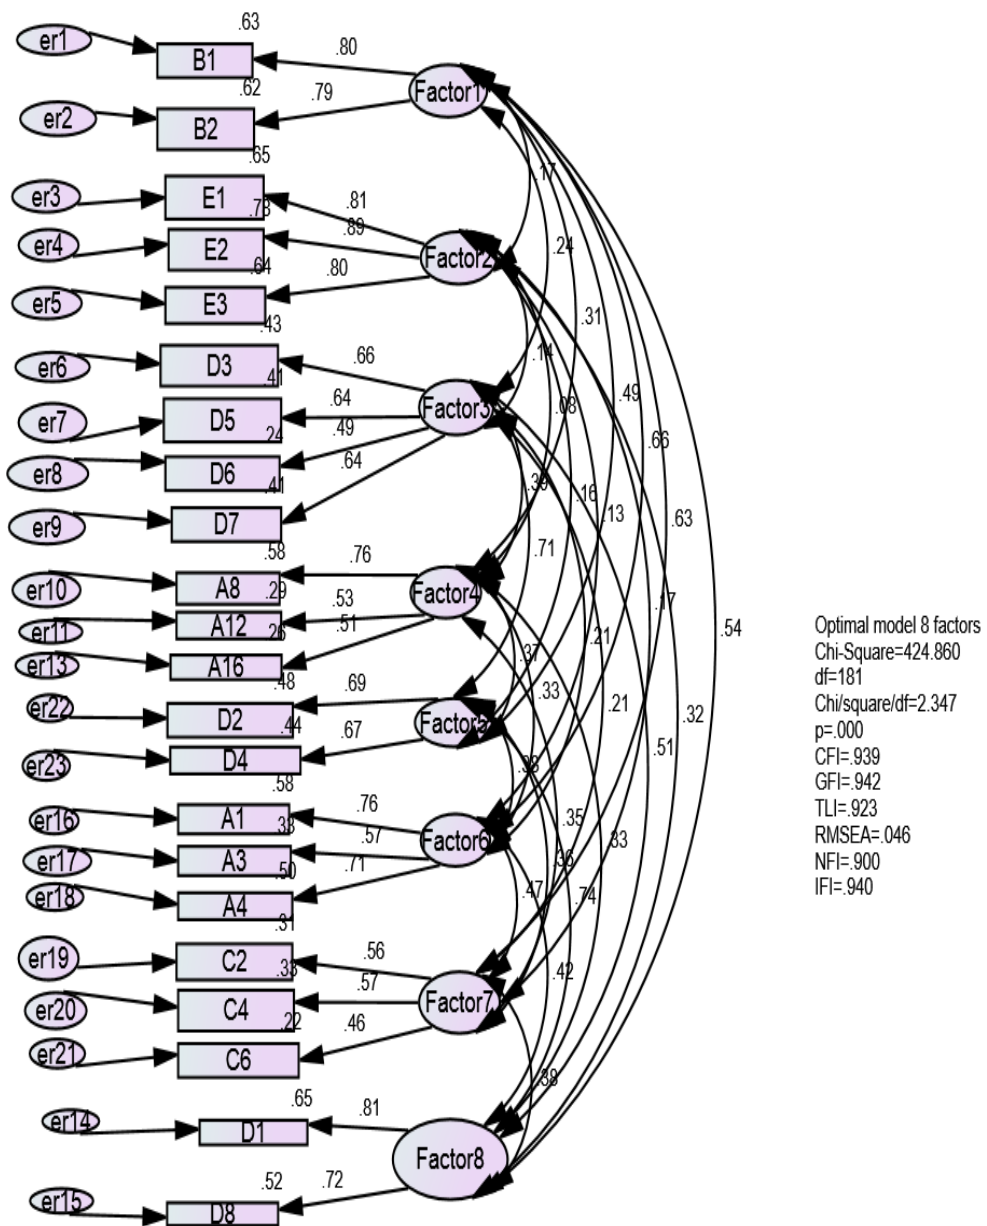

#### Appendix 4: Inter-correlations between Eight factors (scales)

| N | Scales                                                               | 1        | 2        | 3        | 4        | 5        | 6        | 7        |
|---|----------------------------------------------------------------------|----------|----------|----------|----------|----------|----------|----------|
| 1 | Supervisor/Manager Expectations and Actions Promoting Patient Safety | -        |          |          |          |          |          |          |
| 2 | Frequency of Events Reported                                         | 0,155*** |          |          |          |          |          |          |
| 3 | Handoffs and Transitions                                             | 0,286*** | 0,183*** |          |          |          |          |          |
| 4 | Non-punitive Response to Errors                                      | 0,339*** | 0,133*** | 0,371*** |          |          |          |          |
| 5 | Teamwork Across Units                                                | 0,51***  | 0,228*** | 0,64***  | 0,435*** |          |          |          |
| 6 | Teamwork Within Units                                                | 0,664*** | 0,105**  | 0,236*** | 0,356*** | 0,392*** |          |          |
| 7 | Communication Openness                                               | 0,614*** | 0,088*   | 0,259*** | 0,431*** | 0,404*** | 0,517*** |          |
| 8 | Management Support for Patient Safety                                | 0,519*** | 0,311*** | 0,531*** | 0,322*** | 0,722*** | 0,432*** | 0,353*** |

\*\*\* p<0.001, \*\* p<0.01, \*p<0.05

**Appendix 5: Dimensions of HSOPSC for USA (US), Kuwait (KWT), Saudi Arabia (SA), Palestine (PAL), England (ENG), Scotland (SCO), Netherlands (NL), Turkey (TUR) and Switzerland (Swiss) factor models**

| HSOPSC Dimensions                                            | US<br>59 | KWT | SA<br>60 | PAL<br>61                              | ENG<br>31 | SCO<br>78                              | NL<br>30                                                              | TUR<br>26                                                                             | SWISS<br>27                            |
|--------------------------------------------------------------|----------|-----|----------|----------------------------------------|-----------|----------------------------------------|-----------------------------------------------------------------------|---------------------------------------------------------------------------------------|----------------------------------------|
| Supervisor/manager expectations and actions promoting safety | √        | √   | √        | √                                      | √         | √                                      | -                                                                     | -                                                                                     | √                                      |
| Organisational learning— continuous improvement              | √        | -   | √        | √                                      | -         | √                                      | √                                                                     | √                                                                                     | √<br>With<br>Teamwork<br>within units  |
| Teamwork within hospital units                               | √        | √   | √        | √                                      | √         | √                                      | √                                                                     | √                                                                                     | -                                      |
| Communication openness                                       | √        | √   | √        | -                                      | √         | -                                      | √                                                                     | √                                                                                     | -                                      |
| Feedback and communication about error                       | √        | -   | -        | √<br>With<br>Communication<br>Openness | √         | √<br>With<br>Communication<br>Openness | √<br>With<br>Organisational<br>learning—<br>continuous<br>improvement | √<br>With<br>Supervisor<br>expectations<br>and actions<br>promoting<br>patient safety | √<br>With<br>Communication<br>Openness |
| Non-punitive response to error                               | √        | √   | √        | √                                      | √         | √                                      | √                                                                     | √                                                                                     | √                                      |
| Staffing                                                     | √        | -   | √        | √                                      | -         | -                                      | √                                                                     | √                                                                                     | -                                      |
| Hospital management support for patient safety               | √        | √   | -        | √                                      | -         | √                                      | √                                                                     | √<br>With<br>Teamwork<br>across units                                                 | √                                      |



1  
2  
3  
4  
5  
6  
7  
8  
9  
10  
11  
12  
13  
14  
15  
16  
17  
18  
19  
20  
21  
22  
23  
24  
25  
26  
27  
28  
29  
30  
31  
32  
33  
34  
35  
36  
37  
38  
39  
40  
41  
42  
43  
44  
45  
46  
47

| <b>HSOPSC Dimensions</b>              | <b>US<br/>59</b> | <b>KWT</b> | <b>SA<br/>60</b> | <b>PAL<br/>61</b> | <b>ENG<br/>31</b>  | <b>SCO<br/>78</b>  | <b>NL<br/>30</b> | <b>TUR<br/>26</b> | <b>SWISS<br/>27</b>                   |
|---------------------------------------|------------------|------------|------------------|-------------------|--------------------|--------------------|------------------|-------------------|---------------------------------------|
| Teamwork across hospital units        | √                | √          | -                | √                 | √                  | √                  | √                | -                 | -                                     |
| Hospital handoffs and transitions     | √                | √          | √                | √                 | √                  | √                  | √                | √                 | √<br>With<br>Teamwork<br>across units |
| Frequency of incident reporting       | √                | √          | √                | √                 | √                  | √                  | √                | √                 | √                                     |
| Overall perceptions of patient safety | √                | -          | -                | √                 | √<br>With Staffing | √<br>With Staffing | √                | √                 | √<br>With Staffing                    |
| Number of optimal model factors       | 12               | 8          | 8                | 11                | 9                  | 10                 | 11               | 10                | 8                                     |

**Appendix 6: Item composition of dimensions of HSOPSC for USA (US), Kuwait (KWT), Saudi Arabia (SA), England (ENG), Palestine (PAL), Switzerland (Swiss), Netherlands (NL), and Turkey (TUR) factor models**

| HSOPSC Factors                                                       | USA <sup>59</sup> | Kuwait        | SA <sup>60</sup> | ENG <sup>31</sup> | PAL <sup>61</sup> | SWISS <sup>27</sup>        | NL <sup>30</sup>        | TUR <sup>26</sup> |
|----------------------------------------------------------------------|-------------------|---------------|------------------|-------------------|-------------------|----------------------------|-------------------------|-------------------|
| Supervisor/Manager Expectations and Actions Promoting Patient Safety | B1-B2-B3-B4       | B1-B2         | B1-B2            | B1-B2             | B1-B2-B3-B4       | B1-B2-B3-B4                | B1-B2-B3-B4             | ‡                 |
| Frequency of Events Reported                                         | E1-E2-E3*         | E1-E2-E3      | E1-E2-E3         | E1-E2-E3          | E1-E2-E3          | E1-E2-E3                   | E1-E2-E3                | E1-E2-E3          |
| Handoffs and Transitions                                             | D3-D5-D7-D11*     | D3-D5-D7-D6** | D5-D7-D11-D6**   | D3-D5-D7-D11      | D3-D5-D7-D11      | ‡                          | D5-D11                  | D3-D5-D7-D11      |
| Non-punitive Response to Errors                                      | A8-A12-A16        | A8-A12-A16    | A8-A12-A16       | A8-A16            | A8-A12-A16        | A8-A12-A16                 | A8-A12-A16              | A8-A12-A16        |
| Teamwork Across Units                                                | D2-D4-D6-D10*     | D2-D4         | -                | D2-D4-D6-D10      | D2-D4-D6-D10      | D2-D4-D6-D10-D3**<br>-D7** | D2-D4-D10-D3**<br>-D7** | ‡                 |
| Teamwork Within Units                                                | A1-A3-A4-A11      | A1-A3-A4      | A1-A3-A4         | A1-A3-A4          | A1-A3-A4-A11      | A1-A3-A4-A6-A9-A13‡        | A1-A3-A4-A11            | A1-A3-A4-A11      |
| Communication Openness                                               | C2-C4-C6          | C2-C4-C6      | C2-C4            | C2-C4-C6          | C2-C4-C3-C5‡      | ‡                          | C2-C4-C6                | C2-C4-C6          |

| <b>HSOPSC Factors</b>                          | <b>USA</b><br>59 | <b>Kuwait</b> | <b>SA</b><br>60 | <b>ENG</b><br>31 | <b>PAL</b><br>61 | <b>SWISS</b><br>27     | <b>NL</b><br>30    | <b>TUR</b><br>26      |
|------------------------------------------------|------------------|---------------|-----------------|------------------|------------------|------------------------|--------------------|-----------------------|
| Management Support for Patient Safety          | D1-D8-D9*        | D1-D8         | -               | -                | D1-D8-D9         | D1-D8-D9               | D1-D8-D9           | D1-D8-D9              |
| Organisational learning—continuous improvement | A6-A9-A13        | -             | A6-A9-A13-D8**  | -                | A6-A9-A13        | ‡                      | ‡                  | A6-A9-A13             |
| Feedback and communication about error         | C1-C3-C5         | -             | -               | C1-C3-C5         | ‡                | C1-C3-C5-C2-C4-C6‡     | C1-C3-C5-A6-A9-A13 | C1-C3-C5-B1-B2-B3-B4‡ |
| Staffing                                       | A2-A5-A7-A14     | -             | A5-A7           | A2-A14-A10-A17‡  | A2-A5-A14        | A2-A5-A14-A10-A17-A18‡ | A2-A5-A7           | A2-A5-A7-A14          |
| Overall perceptions of safety                  | A10-A15-A17-A18  | -             | -               | ‡                | A15-A17-A18      | ‡                      | A10-A17-A18-A14**  | A10-A15-A17-A18       |
| No of factors                                  | 12               | 8             | 8               | 9                | 11               | 8                      | 11                 | 10                    |

\*For comparison reasons, items with the letter F have been changed to letter D and items with the letter D have been changed to letter E as the modified version used in our study, ‡ denotes a merged dimension, \*\* denotes a moved item from a different dimension

1  
2  
3  
4  
5  
6  
7  
8  
9  
10  
11  
12  
13  
14  
15  
16  
17  
18  
19  
20  
21  
22  
23  
24  
25  
26  
27  
28  
29  
30  
31  
32  
33  
34  
35  
36  
37  
38  
39  
40  
41  
42  
43  
44  
45  
46  
47  
48  
49  
50  
51  
52  
53  
54  
55  
56  
57  
58  
59  
60

For peer review only

**STROBE 2007 (v4) Statement—Checklist of items that should be included in reports of *cross-sectional studies***

| Section/Topic                | Item # | Recommendation                                                                                                                                                                       | Reported on page # |
|------------------------------|--------|--------------------------------------------------------------------------------------------------------------------------------------------------------------------------------------|--------------------|
| <b>Title and abstract</b>    | 1      | (a) Indicate the study’s design with a commonly used term in the title or the abstract                                                                                               | 1                  |
|                              |        | (b) Provide in the abstract an informative and balanced summary of what was done and what was found                                                                                  | 2                  |
| <b>Introduction</b>          |        |                                                                                                                                                                                      |                    |
| Background/rationale         | 2      | Explain the scientific background and rationale for the investigation being reported                                                                                                 | 5                  |
| Objectives                   | 3      | State specific objectives, including any prespecified hypotheses                                                                                                                     | 6                  |
| <b>Methods</b>               |        |                                                                                                                                                                                      |                    |
| Study design                 | 4      | Present key elements of study design early in the paper                                                                                                                              | 7                  |
| Setting                      | 5      | Describe the setting, locations, and relevant dates, including periods of recruitment, exposure, follow-up, and data collection                                                      | 7                  |
| Participants                 | 6      | (a) Give the eligibility criteria, and the sources and methods of selection of participants                                                                                          | 8                  |
| Variables                    | 7      | Clearly define all outcomes, exposures, predictors, potential confounders, and effect modifiers. Give diagnostic criteria, if applicable                                             | -                  |
| Data sources/<br>measurement | 8*     | For each variable of interest, give sources of data and details of methods of assessment (measurement). Describe comparability of assessment methods if there is more than one group | 8                  |
| Bias                         | 9      | Describe any efforts to address potential sources of bias                                                                                                                            | 8                  |
| Study size                   | 10     | Explain how the study size was arrived at                                                                                                                                            | 7,8                |
| Quantitative variables       | 11     | Explain how quantitative variables were handled in the analyses. If applicable, describe which groupings were chosen and why                                                         | 7,8,9              |
| Statistical methods          | 12     | (a) Describe all statistical methods, including those used to control for confounding                                                                                                | -                  |
|                              |        | (b) Describe any methods used to examine subgroups and interactions                                                                                                                  | 8,9                |
|                              |        | (c) Explain how missing data were addressed                                                                                                                                          | 8                  |
|                              |        | (d) If applicable, describe analytical methods taking account of sampling strategy                                                                                                   | 8,9                |
|                              |        | (e) Describe any sensitivity analyses                                                                                                                                                | -                  |
| <b>Results</b>               |        |                                                                                                                                                                                      |                    |

|                          |     |                                                                                                                                                                                                              |             |
|--------------------------|-----|--------------------------------------------------------------------------------------------------------------------------------------------------------------------------------------------------------------|-------------|
| Participants             | 13* | (a) Report numbers of individuals at each stage of study—eg numbers potentially eligible, examined for eligibility, confirmed eligible, included in the study, completing follow-up, and analysed            | 9           |
|                          |     | (b) Give reasons for non-participation at each stage                                                                                                                                                         | 9           |
|                          |     | (c) Consider use of a flow diagram                                                                                                                                                                           | -           |
| Descriptive data         | 14* | (a) Give characteristics of study participants (eg demographic, clinical, social) and information on exposures and potential confounders                                                                     | Appendix 1  |
|                          |     | (b) Indicate number of participants with missing data for each variable of interest                                                                                                                          | 9           |
| Outcome data             | 15* | Report numbers of outcome events or summary measures                                                                                                                                                         | -           |
| Main results             | 16  | (a) Give unadjusted estimates and, if applicable, confounder-adjusted estimates and their precision (eg, 95% confidence interval). Make clear which confounders were adjusted for and why they were included | 9           |
|                          |     | (b) Report category boundaries when continuous variables were categorized                                                                                                                                    | -           |
|                          |     | (c) If relevant, consider translating estimates of relative risk into absolute risk for a meaningful time period                                                                                             | -           |
| Other analyses           | 17  | Report other analyses done—eg analyses of subgroups and interactions, and sensitivity analyses                                                                                                               | Appendix 2  |
| <b>Discussion</b>        |     |                                                                                                                                                                                                              |             |
| Key results              | 18  | Summarise key results with reference to study objectives                                                                                                                                                     | 15          |
| Limitations              | 19  | Discuss limitations of the study, taking into account sources of potential bias or imprecision. Discuss both direction and magnitude of any potential bias                                                   | 4           |
| Interpretation           | 20  | Give a cautious overall interpretation of results considering objectives, limitations, multiplicity of analyses, results from similar studies, and other relevant evidence                                   | 15,16       |
| Generalisability         | 21  | Discuss the generalisability (external validity) of the study results                                                                                                                                        | 15,16,17,18 |
| <b>Other information</b> |     |                                                                                                                                                                                                              |             |
| Funding                  | 22  | Give the source of funding and the role of the funders for the present study and, if applicable, for the original study on which the present article is based                                                | N/A         |

\*Give information separately for cases and controls in case-control studies and, if applicable, for exposed and unexposed groups in cohort and cross-sectional studies.

**Note:** An Explanation and Elaboration article discusses each checklist item and gives methodological background and published examples of transparent reporting. The STROBE checklist is best used in conjunction with this article (freely available on the Web sites of PLoS Medicine at <http://www.plosmedicine.org/>, Annals of Internal Medicine at <http://www.annals.org/>, and Epidemiology at <http://www.epidem.com/>). Information on the STROBE Initiative is available at [www.strobe-statement.org](http://www.strobe-statement.org).

# BMJ Open

## Hospital Survey on Patient Safety Culture: Psychometric evaluation in Kuwaiti Public Healthcare Settings

|                                 |                                                                                                                                                                                                                                             |
|---------------------------------|---------------------------------------------------------------------------------------------------------------------------------------------------------------------------------------------------------------------------------------------|
| Journal:                        | <i>BMJ Open</i>                                                                                                                                                                                                                             |
| Manuscript ID                   | bmjopen-2018-028666.R2                                                                                                                                                                                                                      |
| Article Type:                   | Research                                                                                                                                                                                                                                    |
| Date Submitted by the Author:   | 08-Apr-2019                                                                                                                                                                                                                                 |
| Complete List of Authors:       | Alsalem, Gheed; University of Glasgow, institute of health and wellbeing; Ministry of health, Quality and Accreditation Directorate<br>Bowie, Paul; NHS Scotland,<br>Morrison, Jill; University of Glasgow, General Practice & Primary Care |
| <b>Primary Subject Heading</b>: | Health services research                                                                                                                                                                                                                    |
| Secondary Subject Heading:      | Health policy, Public health, Research methods, Evidence based practice                                                                                                                                                                     |
| Keywords:                       | patient safety, safety culture, psychometrics, surveys, quality improvement                                                                                                                                                                 |
|                                 |                                                                                                                                                                                                                                             |

SCHOLARONE™  
Manuscripts

# Hospital Survey on Patient Safety Culture: Psychometric evaluation in Kuwaiti Public Healthcare Settings

Gheed Al Salem<sup>1</sup>, Paul Bowie<sup>2</sup>, Jill Morrison<sup>3</sup>

1. PhD Student, Institute of Health and Wellbeing, University of Glasgow, UK / Ministry of Health, Kuwait
2. Programme Director NHS Education for Scotland, Glasgow, UK / Hon Associate Professor, Institute of Health and Wellbeing, University of Glasgow, Glasgow, UK
3. Professor of General Practice, Institute of Health and Wellbeing, University of Glasgow, Glasgow, UK

## <sup>1</sup>CORRESPONDING AUTHOR

Institute of Health and Wellbeing,  
General Practice and Primary Care,  
University of Glasgow, 1, Horselethill Road, Glasgow, G12 9LX  
United Kingdom  
Tel: +44(0)141 330 8348  
Fax: +44 (0)141 330 8331  
Email: [drgheed@aol.com](mailto:drgheed@aol.com)

<sup>2</sup>NHS Education for Scotland, Glasgow, Scotland, UK  
2 Central Quay, 89 Hydepark Street, Glasgow, G3 8BW  
Tel: +44(0)141 223 1400/1401  
Fax: +44(0)141 223 1403  
Email: [paul.bowie@nes.scot.nhs.uk](mailto:paul.bowie@nes.scot.nhs.uk)

<sup>3</sup>Clerk of Senate and Vice Principal  
Senate Office  
University of Glasgow  
Level 5, Main Building  
Tel: +44(0)141 330 8744  
Email: [Jill.Morrison@glasgow.ac.uk](mailto:Jill.Morrison@glasgow.ac.uk)

Word count: 3998



## ABSTRACT

### Objective

As healthcare organisations endeavor to improve the quality and safety of their services, there is increasing recognition of the importance of building a culture of safety to promote patient safety and improve the outcomes of patient care. Surveys of safety culture/climate have not knowingly been conducted in Kuwait public hospitals, nor are valid or reliable survey instruments available for this context. This study aims to investigate the psychometric properties of the HSOPSC (Hospital Survey of Patient Safety Culture) tool in Kuwait public hospitals in addition to constructing an optimal model to assess the level of safety climate in this setting.

### Design

cross-sectional study.

### Setting

Three public hospitals in Kuwait.

### Participants

About 1,317 healthcare professionals.

### Main outcome measure

An adapted and contextualised version of HSOPSC was used to conduct psychometric evaluation including exploratory factor analysis, confirmatory factor analysis reliability and correlation analysis.

### Results

1,317 questionnaires (87%) were returned. Psychometric evaluation, showed an optimal model of Eight factors and 22 safety climate items. All items have strong factor loadings (0.42-0.86) and are theoretically related. Reliability analysis showed satisfactory results ( $\alpha > 0.60$ ).

## Conclusions

This is the first validation study of a standardised safety climate measure in a Kuwaiti healthcare setting. An optimal model for assessing patient safety climate was produced that mirrors other international studies and which can be used for measuring the prevailing safety climate. More importance should be attached to the psychometric fidelity of safety climate questionnaires before extending their use in other healthcare culture and contexts internationally.

**KEYWORDS:** patient safety, safety culture, psychometrics, surveys, quality improvement.

**STRENGTHS AND LIMITATIONS OF THIS STUDY:**

- A rigorous and scientific psychometric approach was designed and executed based on recommended reporting practices to test the original HSOPSC model and construct an optimal model.
- The large sample size (n=1280) allowed for the dataset to be split and for factor analysis to be undertaken with acceptable model fit indices.
- One limitation is the number of items per factor in the optimal model. Three factors contained only two items per factor in the final Eight-factor model.
- Another limitation is the exclusion of partially answered questionnaires. As a result, a subset of the total sample, with all items answered, was used for the validation of the psychometric properties of the HSOPSC.

## INTRODUCTION

Modern healthcare systems are concerned with improving the safety of patient care and attempting to build a strong organisational safety cultures. “Safety Culture” is identified as a key element of a healthcare organisation’s ability to learn openly from safety incidents and reduce preventable harm to patients. The perceived importance of safety culture in improving patient safety and its impact on clinical outcomes has led to a growing interest in the assessment of safety culture in healthcare organisations. The use of survey questionnaires is one of the most popular methods for assessing safety culture. These surveys aim to measure healthcare workers' perceptions of the prevailing safety culture or “safety climate” in their organisations.

There are numerous definitions of safety culture and safety climate. Despite their distinctive terminologies, they are commonly used arbitrarily and interchangeably in the literature <sup>1</sup>. Safety culture has been described as a set of shared values, beliefs, norms, and attitudes that interact with an organisation’s structure and control systems resulting in behavioural norms <sup>2 3</sup>. Safety climate provides a “snapshot” of the perceptions held by healthcare workers about visible, surface level features of safety culture at a given point in time <sup>4</sup>. It “*assesses workforce perceptions of procedures and behaviours in their work environment that indicate the priority given to safety relative to other organisational goals*” <sup>5</sup>.

Assessing the status of the existing safety climate in a healthcare organisation is promoted as the first step for developing a strong and solid safety culture <sup>6</sup>. The resulting data potentially offers policymakers, healthcare providers, teams and managers a clear view of areas in need of attention to strengthen the prevailing safety climate, in addition to identifying specific challenges that impede progress in safety initiatives <sup>7</sup>. It can also be used for benchmarking and improving safety climate measures across time and between organisations on national and international levels <sup>8 9</sup>.

A range of safety climate assessment tools have been developed for acute hospital settings, although the scientific rigour with which they were designed and tested is variable <sup>5 10 11</sup>.

Multiple reviews of patient safety climate instruments have been published <sup>5 10-16</sup>. Most concluded that the Safety Attitudes Questionnaire (SAQ) and Hospital Survey on Patient Safety Culture

1  
2  
3 (HSOPSC) were the most appropriate tools available in terms of their psychometric properties, but  
4 also critiqued climate tools generally as many lack appropriate scale development, validation and  
5 evidence for their predictive validity. Over a decade ago, Flin, et al. <sup>5</sup> argued that it is essential  
6 that tools are developed with robust psychometric properties to enable valid interpretations of  
7 patient safety climate test scores to be made.  
8  
9  
10  
11  
12

13  
14 Despite this, many published studies are still limited in their reporting of the necessary  
15 psychometric properties of questionnaires <sup>5 10 17 18</sup>. It is argued that HSOPSC is one of the most  
16 rigorously tested instruments with good psychometric properties in addition to being tested on the  
17 necessary large sample sizes <sup>5</sup>. Psychometric analysis involves the use of established statistical  
18 assessment techniques to assess the psychometric properties of questionnaires and identify the  
19 underlying safety culture dimensions <sup>11</sup>.  
20  
21  
22  
23  
24  
25

26 Repeated high-profile media coverage has drawn the attention of Kuwaiti politicians and the public  
27 to failings in healthcare delivery and patient safety, which has contributed to growing demands for  
28 a better quality of care <sup>19-21</sup>. Subsequent inquiries and reports have placed patient safety high on  
29 the Kuwait policy agenda. The Ministry of Health (MOH) responded by investing significantly in  
30 the improvement of healthcare services. Safety climate assessment is one of the latest approaches  
31 to be adopted by the MOH with the goal of evaluating and improving patient safety in Kuwaiti  
32 hospitals.  
33  
34  
35  
36  
37  
38  
39

40 Surveys of safety climate have yet to be conducted at public hospitals in the state of Kuwait, nor  
41 are valid or reliable survey instruments available for this purpose. This study aims, therefore, to  
42 assess the psychometric properties of the HSOPSC tool in Kuwaiti public hospitals in addition to  
43 constructing an optimal model to assess the level of safety climate in this setting and to benchmark  
44 the data against other international studies.  
45  
46  
47  
48  
49  
50  
51  
52  
53  
54  
55  
56  
57  
58  
59  
60

## METHOD

### Instrument selection

HSOPSC is a 12-factor, 42 item survey questionnaire. It assesses ten climate dimensions of patient safety, with two outcome measures (overall perceptions of patient safety and frequency of event reporting). Two additional single-item outcome measure are included<sup>22 23</sup>. The HSOPSC tool was chosen for this study for several reasons. Firstly, a systematic review of tools designed for acute hospital settings concluded that HSOPSC had good overall methodological quality with good assessment of the tool's reported psychometric properties (Alsalem et al 2018). Secondly, HSOPSC was one of the most rigorously tested instruments at the time of selection, with extensive literature reporting its psychometric properties<sup>5</sup>. The tool has been extensively used in hospitals in the United States where it was originally developed<sup>24</sup>, and validated for use in more than 60 countries and translated into 30 different languages<sup>25-32</sup>. Thirdly, HSOPSC is a comprehensive measure of safety climate as it assesses key aspects related to patient safety at multiple levels of analysis including the individual, unit and hospital levels (Box 1). Finally, the tool is freely available, uses clear language with a scale that is simple and easy to follow.

### Instrument modification

The English version of the tool was pilot tested and modified for Kuwaiti healthcare in order to solve any technical and feasibility issues associated with its application<sup>33 34</sup>. Seven face-to-face interviews were conducted with a panel of healthcare staff from MOH (including doctors, nurses and risk and safety officers) to evaluate HSOPSC content and ensure the proper transfer of the intended meaning of the questionnaire items to the culture and language differences in the Kuwait context. The panel endorsed the HSOPSC content as being of high relevance to safety culture in Kuwaiti hospitals. All items were retained. However, wording was modified in eight items to clarify their meaning as some comments indicated potential ambiguity in items' interpretations.

### Instrument testing

A stratified random sample was drawn from healthcare clinical staff in three public hospitals in Kuwait. To ensure that the sample size was adequate to satisfactorily undertake factor analysis (FA), sample size requirements (sample size of the study, ratio of the sample size to the number

1  
2  
3 of variables, ratio of the number of variables to the number of factors) were evaluated <sup>35</sup>.  
4  
5 Tabachnick and Fidell <sup>36</sup> rule recommends having at least 300 cases to undertake FA. The Kaiser-  
6  
7 Meyer-Olkin (KMO) coefficient was used as another measure of sampling adequacy. KMO  
8  
9 coefficient values range between 0 and 1. Surveys of health professionals can be challenging and  
10  
11 are characterised by declining response rates <sup>37</sup> with a significant downward trend in response rates  
12  
13 from 1998 to 2008 <sup>38</sup>. Based on their findings, the predicted response rate for this study was 20%  
14  
15 and it was estimated that the sample size should be a minimum of 1,500 of distributed  
16  
17 questionnaires.

### 18 19 **Data collection and management**

20  
21 Staff members were invited by letter to participate in the study. Questionnaires were distributed  
22  
23 across different departments in the three public hospitals. The questionnaires were completed  
24  
25 anonymously and returned to multiple collection boxes located within the hospitals. Data were  
26  
27 coded and entered into an electronic data file using the Statistical Package for Social Science  
28  
29 (SPSS 24). Negatively worded items were reverse coded. If less than one entire section of the  
30  
31 survey was answered or less than half of the items throughout the entire survey (in different  
32  
33 sections) were answered, or if every item was answered the same, these questionnaires were  
34  
35 excluded <sup>39</sup>. Missing values were deleted in a listwise manner in order to minimise any possible  
36  
37 biases <sup>40</sup>.

### 38 39 **Factor analysis (FA)**

40  
41 FA is a statistical method that “*explores the extent to which individual items in a questionnaire*  
42  
43 *can be grouped together according to the correlations between the responses to them*”, thus  
44  
45 reducing the dimensionality of the data <sup>41</sup>. It can be applied as a data reduction or a structure  
46  
47 detection method <sup>42</sup>. The two main techniques of FA are Exploratory Factor Analysis (EFA), and  
48  
49 Confirmatory Factor Analysis (CFA), which are both recommended to test construct validity <sup>43</sup>.

50  
51 EFA allows the researcher to uncover the main dimensions to develop a theory, or model from a  
52  
53 smaller number of latent constructs that are often represented by a larger set of measured variables  
54  
55 <sup>44 45</sup>. CFA tests a pre-determined factor structure or a proposed theory <sup>44 45</sup>. This study combined  
56  
57 both approaches to develop an optimal model, based on the original HSOPSC model, for  
58  
59

1  
2  
3 specifically assessing patient safety climate in Kuwaiti public hospitals. Due to the controversy  
4 associated with conducting EFA and CFA on the same data, a split-half validation technique is  
5 recommended<sup>46 47</sup>. Therefore, the Kuwaiti dataset was randomly split into two independent  
6 datasets using SPSS 24. Each group contains a set of 640 (n=640) cases - the calibration half of  
7 the dataset was used for model construction and the validation half of the dataset was used for  
8 confirming the explored factor structure resulting from model construction.  
9

10  
11  
12  
13  
14  
15 Data analysis was based on three main phases. 1. To investigate whether the original HSOPSC 12-  
16 factor model is appropriate for the Kuwaiti data. Both CFA and reliability analysis were used at  
17 this step. 2. To examine whether an alternative factor model would fit the Kuwaiti data better. For  
18 model construction, EFA was carried out using the calibration half of the dataset (Sample A,  
19 n=640). 3. Undertaking CFA and reliability analysis using the validation half of the dataset, to test  
20 the fit of the resultant model from the previous phase (Sample B, n=640). Cronbach's alpha ( $\alpha$ )  
21 was calculated for each factor to examine the internal consistency or reliability with the minimum  
22 criterion for acceptable reliability of at least  $\alpha \geq 0.60$  as recommended for the majority of research  
23 purposes<sup>48 49</sup>. Factor correlations of the optimal model were performed in addition to comparisons  
24 between the CFA output of our optimal factor model and the outputs reported in previous studies.  
25  
26  
27  
28  
29  
30  
31  
32  
33

### 34 **Patient and public involvement statement**

35 Patient and public were not involved in the design, planning or the analysis of the study.  
36  
37  
38

## 39 **RESULTS**

### 40 41 42 **Response rate and sample demographics**

43 Of the 1,511 questionnaires distributed at the three hospitals, 1,317 questionnaires (87%) were  
44 returned. A KMO statistic of 0.88 was calculated, which indicates that the sample has a sufficient  
45 level of homogeneity<sup>50 51</sup>. Thirty-seven questionnaires were excluded. Appendix 1 summarizes  
46 the relevant demographics of survey respondents.  
47  
48  
49  
50  
51  
52  
53  
54  
55  
56  
57  
58  
59  
60



## Instrument testing

Following the deletion of missing values, one thousand, two hundred and eighty questionnaires (n=1280) were considered eligible and this number of completed questionnaires (n=1280) was sufficient to undertake FA.

### Testing the original HSOPSC (12-factor) model

A CFA was performed, using AMOS software<sup>52</sup>, to test the model fit of the original HSOPSC 12-factor structure using the Kuwaiti data (n=1280). The global fit of our model was not consistently satisfactory for the Kuwaiti data. Three criteria measures did not indicate an acceptable fit with Comparative Fit Index (CFI) = 0.81 (CFI values  $\geq 0.90$  considered a good model fit<sup>53</sup>), Chi-squared statistic per one degree of freedom ( $\chi^2/DF$ ) = 4.81 ( $\chi^2/DF$  value  $\leq 2$  for a good fit<sup>54</sup>), and TLI = 0.784 (TLI of  $> 0.90$  indicates a good fit<sup>53</sup>) values indicate that the fit is not adequately good enough to confirm the proposed factor structure.

The internal consistency of the Kuwaiti data (n=1280) was  $\geq 0.60$  within nine dimensions. Three dimensions had internal consistencies less than 0.60. Additionally, two dimensions have a questionable internal consistency because their Cronbach's alpha value was 0.60 (Cronbach's  $\alpha=0.604$  for "Non-punitive Response to Errors" and Cronbach's  $\alpha=0.601$  for "communication openness"). In summary, the results of the CFA and reliability analysis indicate that the original HSOPSC 12 Factor model is not a satisfactory fit when it is used for the Kuwaiti data. Therefore, an EFA was used for investigating an alternative factor structure which might be more appropriate for Kuwaiti data.

### Construction of an optimal model

EFA consists of two basic stages. 1. Estimating the number of factors that should be extracted to represent the HSOPSC factor structure; and 2. Interpreting the meaning of the extracted factors and representing them in terms of theoretical structures that reflect the patient safety climate dimensions. EFA (principal axis factoring with varimax then oblique rotation) was performed on the calibration half of the dataset (n=640). Based on the Kaiser criterion of Eigenvalues greater than one (Eigenvalues  $> 1$ )<sup>50</sup> and Cattell scree plot<sup>55</sup>, different numbers of factors (12,11,10,9,8,7 factors) were extracted and investigated to find the optimal alternative model (see Appendix 2).

Following the rotation of factors the factor pattern matrix was examined to decide on the acceptable level of loading for variables to define factors<sup>56</sup>. To reach a satisfactory solution, a number of points need to be taken into consideration including identifying items with low communalities (<0.3), no or low loading (<0.4), items with cross loadings (>0.30) and the theoretical structure of items. It should be noted that the decision on how many factors to retain based on the degree of comprehensibility and interpretability of the factor structure in the context of the research<sup>57</sup>. In addition, theoretical knowledge regarding the construct under study is more significant than a statistical measure and the items and factors should make conceptual sense and be theoretically related<sup>56</sup>.

#### Final factor solution

An Eight-factor solution (all loadings  $\geq 0.40$ ) showed the best model fit to the Kuwaiti dataset. The Scree plot of the final EFA solution is shown in Figure 1. The structure and factor loadings of the final EFA solution are reported in Table 1. The final solution explains 50.2% of variance by eight extracted factors and represents 22 items from the safety climate questionnaire (20 items were excluded). All factor loadings are within the range of 0.428-0.864.

**Table 1: Pattern matrix of the final EFA solution (Eight factors, 22 items)**

| Variable                                                                                                                         | Factor |      |       |   |   |   |   |   |
|----------------------------------------------------------------------------------------------------------------------------------|--------|------|-------|---|---|---|---|---|
|                                                                                                                                  | 1      | 2    | 3     | 4 | 5 | 6 | 7 | 8 |
| (B1) My supervisor/manager says a good word when he/she sees a job done according to established patient safety procedures (SEA) | ,822   |      |       |   |   |   |   |   |
| (B2) My supervisor/manager seriously considers staff suggestions for improving patient safety (SEA)                              | ,623   |      |       |   |   |   |   |   |
| (E2) When a mistake is made, but has no potential to harm the patient, how often is this reported? (FER)                         |        | ,864 |       |   |   |   |   |   |
| (E1) When a mistake is made, but is caught and corrected before affecting the patient, how often is this reported? (FER)         |        | ,776 |       |   |   |   |   |   |
| (E3) When a mistake is made that could harm the patient, but does not, how often is this reported? (FER)                         |        | ,776 |       |   |   |   |   |   |
| (D5) Important patient care information is often lost during shift changes. (negatively worded) (HO)                             |        |      | -,662 |   |   |   |   |   |

| Variable                                                                                                                   | Factor |   |       |      |       |      |      |      |
|----------------------------------------------------------------------------------------------------------------------------|--------|---|-------|------|-------|------|------|------|
|                                                                                                                            | 1      | 2 | 3     | 4    | 5     | 6    | 7    | 8    |
| (D3) Things 'fall between the cracks' when transferring patients from one unit to another (negatively worded) (HO)         |        |   | -,621 |      |       |      |      |      |
| (D6) It is often unpleasant to work with staff from other hospital units. (negatively worded) (TWAU)                       |        |   | -,495 |      |       |      |      |      |
| (D7) Problems often occur in the exchange of information across hospital units. (negatively worded) (HO)                   |        |   | -,428 |      |       |      |      |      |
| (A16) Staff worry that mistakes they make are kept in their personnel file. (negatively worded) (NRP)                      |        |   |       | ,578 |       |      |      |      |
| (A8) Staff feel like their mistakes are held (used) against them. (negatively worded) (NPR)                                |        |   |       | ,559 |       |      |      |      |
| (A12) When an incident is reported, it feels like the person is being reported, not the problem. (negatively worded) (NPR) |        |   |       | ,531 |       |      |      |      |
| (D4) There is good cooperation among hospital units that need to work together (TWAU)                                      |        |   |       |      | -,641 |      |      |      |
| (D2) Hospital units do not coordinate well with each other. (negatively worded) (TWAU)                                     |        |   |       |      | -,522 |      |      |      |
| (A1) People support one another in this unit (TWWU)                                                                        |        |   |       |      |       | ,688 |      |      |
| (A3) When a lot of work needs to be done quickly, we work together as a team to get the work done (TWWU)                   |        |   |       |      |       | ,605 |      |      |
| (A4) In this unit, people treat each other with respect (TWWU)                                                             |        |   |       |      |       | ,556 |      |      |
| (C6) Staff are afraid to ask questions when something does not seem right. (negatively worded) (CO)                        |        |   |       |      |       |      | ,615 |      |
| (C4) Staff feel free to question the decisions or actions of those with more authority (CO)                                |        |   |       |      |       |      | ,600 |      |
| (C2) Staff will freely speak up if they see something that may negatively affect patient care (CO)                         |        |   |       |      |       |      | ,524 |      |
| (D1) Hospital management provides a work climate that promotes patient safety (MS)                                         |        |   |       |      |       |      |      | ,677 |
| (D8) The actions of hospital management show that patient safety is a top priority (MS)                                    |        |   |       |      |       |      |      | ,574 |

Extraction Method: Principal Axis Factoring. Rotation Method: Oblimin with Kaiser Normalization.

Rotation converged in 16 iterations. Supervisor/manager expectations and actions promoting safety (SMEA), Organisational learning—continuous improvement (OL), Teamwork within hospital units (TWWU), Teamwork across hospital units (TWAU), Communication openness (CO), Feedback and communication about error (FB), Non-punitive response to error (NPRE), Staffing (S), Hospital management support for patient safety (MS), Hospital handoffs and transitions (HO), Frequency of incident reporting (FER), Overall perceptions of patient safety (OPPS).

Five factors (Factor 2, Factor 3, Factor 4, Factor 6, and Factor 7) have three and more items with loading >0.4. Factor 1, Factor 5, and Factor 8 have two items with very high loading of >0.5 and the items in each factor are theoretically related (Table 2). There are no cross loaded items and there are no items with loading <0.4 and with communalities <0.3 in the solution. The solution is

essentially consistent with all items within each factor theoretically related. Only D6 moved from "Teamwork across units" to "Handoffs and transitions."

**Table 2: Structure, factors loadings and internal consistency of the final EFA solution (Eight factors, 22 items)**

| Number of Factor | Factor                                                       | Heavy loaded items (>0.4) | Number of items | Cronbach's Alpha |
|------------------|--------------------------------------------------------------|---------------------------|-----------------|------------------|
| 1                | Supervisor/Manager Expectations and Actions Promoting Safety | B1-B2                     | 2               | 0.776            |
| 2                | Frequency of Events Reported                                 | E1-E2-E3                  | 3               | 0.858            |
| 3                | Handoffs and Transitions                                     | D3-D5-D6-D7               | 4               | 0.685            |
| 4                | Non-punitive Response to Errors                              | A8-A12-A16                | 3               | 0.604            |
| 5                | Teamwork Across Units                                        | D2-D4                     | 2               | 0.689            |
| 6                | Teamwork Within Units                                        | A1-A3-A4                  | 3               | 0.705            |
| 7                | Communication Openness                                       | C2-C4-C6                  | 3               | 0.601            |
| 8                | Management Support for Patient Safety                        | D1-D8                     | 2               | 0.724            |

Testing the final factor (Eight-factor) model

The optimal Eight-factor model was vigorously examined by conducting two confirmatory analyses initially using the validation half of the dataset (n=640), followed by the whole dataset (n=1280). All estimated parameters indicate a good model fit (Eight factors and 22 items) as reported in Table 3.

**Table 3: CFA Results of Eight factor optimal model (validation sample and whole sample)**

| Eight-factors model | Chi-Square statistic ( $\chi^2$ ) | DF          | CMIN/DF ( $\chi^2/DF$ ) | CFI           | RMR           | SRMR          | RMSEA         | TLI           |
|---------------------|-----------------------------------|-------------|-------------------------|---------------|---------------|---------------|---------------|---------------|
| Validation sample   | 424.9<br>good                     | 181<br>good | 2.3<br>acceptable       | 0.94<br>good  | 0.049<br>good | 0.048<br>good | 0.046<br>good | 0.92<br>good  |
| Whole sample        | 617.8<br>good                     | 181<br>good | 3.4<br>acceptable       | 0.946<br>good | 0.041<br>good | 0.038<br>good | 0.043<br>good | 0.931<br>good |

Chi-square test statistic ( $\chi^2$ ), Chi-squared statistic per one freedom degree ( $\chi^2/DF$ ), the Comparative Fit Index (CFI), Root mean square residuals (RMR), the Standardised Root Mean Square Residual (SRMR), the Root Mean Square Error of Approximation (RMSEA), Tucker-Lewis Index (TLI)

The standardised path coefficients reflecting the strength of the relationship between items and dimensions<sup>58</sup> were found to be generally large (>0.50) and ranged from 0.46 (Communication openness) to 0.89 (Frequency of incidents reported) (see Appendix 3). Therefore, this model was accepted as the optimal model of HSOPSC for the Kuwaiti healthcare setting.

### Reliability

Reliability analysis was performed using the whole sample with Cronbach's Alpha values reported to be  $\geq 0.60$  for all factors. Therefore, the internal consistency was acceptable for the Eight factors solution (Table 2). In order to test the construct validity of the HSOPSC instrument, inter-correlation coefficients with Pearson's  $r$  were calculated between the Eight factors in addition to the two single item outcome measures (patient safety grade and number of incidents reported).

The Pearson's correlation coefficients between scale scores are reported in online appendix 4.

Inter-correlation coefficients ranged between 0.08 and 0.72. All correlation coefficients are significant. The highest correlations were those between "Management support for patient safety" and "Teamwork across units" ( $r=0.722$ ). All eight factors are interrelated to each other. Most of the correlation coefficients indicate a moderate correlation between dimensions. This indicates that no two factors are measuring the same construct.

### Proposed optimal Eight factors model for Kuwaiti data

As shown in Table 4, the proposed optimal model structure includes 8 dimensions and 22 items.

**Table 4: Proposed Eight factors optimal model for Kuwaiti data**

|                                                                                                                           |
|---------------------------------------------------------------------------------------------------------------------------|
| <b>Factor 1: Supervisor/Manager Expectations and Actions Promoting Patient Safety (2 items)</b>                           |
| B1: My supervisor/manager says a good word when he/she sees a job done according to established patient safety procedures |
| B2: My supervisor/manager seriously considers staff suggestions for improving patient safety.                             |
| <b>Factor 2: Frequency of Events Reported (3 items)</b>                                                                   |
| E1: When a mistake is made, but is caught and corrected before affecting the patient, how often is this reported?         |
| E2: When a mistake is made, but has no potential to harm the patient, how often is this reported?                         |
| E3: When a mistake is made that could harm the patient, but does not, how often is this reported?                         |
| <b>Factor 3: Handoffs and Transitions (4 items)</b>                                                                       |
| D3: Things "fall between the cracks" when transferring patients from one unit to another. (negatively worded)             |

|                                                                                                                     |
|---------------------------------------------------------------------------------------------------------------------|
| D5: Important patient care information is often lost during shift changes. (negatively worded)                      |
| D6: It is often unpleasant to work with staff from other hospital units. (negatively worded)                        |
| D7: Problems often occur in the exchange of information across hospital units. (negatively worded)                  |
| <b>Factor 4: Non-punitive Response to Errors (3 items)</b>                                                          |
| A8: Staff feel like their mistakes are held (used) against them. (negatively worded)                                |
| A12: When an incident is reported, it feels like the person is being reported, not the problem. (negatively worded) |
| A16: Staff worry that mistakes they make are kept in their personnel file. (negatively worded)                      |
| <b>Factor 5: Teamwork Across Units (2 items)</b>                                                                    |
| D2: Hospital units do not coordinate well with each other. (negatively worded)                                      |
| D4: There is good cooperation among hospital units that need to work together.                                      |
| <b>Factor 6: Teamwork Within Units (3 items)</b>                                                                    |
| A1: People support one another in this unit.                                                                        |
| A3: When a lot of work needs to be done quickly, we work together as a team to get the work done.                   |
| A4: In this unit, people treat each other with respect.                                                             |
| <b>Factor 7: Communication Openness (3 items)</b>                                                                   |
| C2: Staff will freely speak up if they see something that may negatively affect patient care.                       |
| C4: Staff feel free to question the decisions or actions of those with more authority.                              |
| C6: Staff are afraid to ask questions when something does not seem right. (negatively worded)                       |
| <b>Factor 8: Management Support for Patient Safety (2 items)</b>                                                    |
| D1: Hospital management provides a work climate that promotes patient safety.                                       |
| D8: The actions of hospital management show that patient safety is a top priority.                                  |

## DISCUSSION

This psychometric evaluation is the first reported validation study of a standardised safety climate measure in a Kuwaiti healthcare setting. The psychometric properties of the HSOPSC questionnaire were assessed and an optimal model for assessing patient safety climate in Kuwaiti hospitals was constructed. The final questionnaire contains 22 safety climate items (variables) that measure eight safety climate factors. The optimal model's psychometric properties (including validity and reliability) were good with all items loading strongly ( $>0.40$ ) onto one factor and all items, within each factor, were theoretically related.

Our results are in line with other studies investigating the psychometric properties of the original HSOPSC questionnaire. The suitability of the original HSOPSC model for Kuwaiti data was tested and results revealed an unsatisfactory fit<sup>59</sup>. Different international studies<sup>27 31 60 61</sup> reported similar findings. This finding is in contrast with other studies that assessed patient safety climate by using

1  
2  
3 the original HSOPSC questionnaire <sup>59</sup> in hospitals without examining the reliability and validity  
4 of the questionnaire in a different context <sup>62-68</sup>  
5  
6  
7

8  
9 Various underlying factor structures were identified as optimal factor models. The original 12  
10 factor model was replicated in Belgian <sup>6</sup>, Portuguese <sup>69</sup> Brazilian<sup>70</sup> and Scottish data <sup>71</sup>. Other  
11 studies reported 11 factor models for Dutch <sup>30</sup>, Arabic <sup>61</sup>, Croatian <sup>72</sup> and Norwegian data <sup>73</sup>; 10  
12 factor models for French <sup>28</sup>, Turkish <sup>26</sup>, Chinese <sup>74</sup> and Brazilian data <sup>75</sup>; 9 factor models for UK <sup>31</sup>  
13 and Slovene data <sup>76</sup>; Eight factor models for Swiss <sup>27</sup>, Saudi <sup>60</sup>, Kosovo <sup>77</sup> and Kuwaiti data. This  
14 discrepancy in results could be attributed to differences in employing survey methods and  
15 psychometric analytical techniques, in addition to the various modifications made to adapt the  
16 original instrument to different healthcare settings <sup>71</sup>. Neglect of crucial elements, including  
17 context, processes and actors involved, when attempting to adapt an instrument in a different  
18 setting might lead to conflicting results and might weaken the validity of the instrument <sup>78</sup>. Thus,  
19 the original HSOPSC will clearly be limited when used in other contexts without proper  
20 assessment of its psychometric properties.  
21  
22  
23  
24  
25  
26  
27  
28

29 The optimal model of our study is in line with other international studies <sup>31 60</sup>. Four dimensions  
30 were either dropped or merged with other factors into a single dimension. In our study, the same  
31 dimensions reported low reliability using the original HSOPSC in addition to other international  
32 studies <sup>31 60 79</sup>. The optimal model was confirmed using CFA with good model fit indices. This was  
33 consistent with the CFA results of the USA <sup>59</sup>, Saudi Arabia <sup>60</sup>, Palestine <sup>61</sup>, UK <sup>31</sup> and Scotland <sup>71</sup>  
34 optimal models.  
35  
36  
37  
38  
39  
40

41 Considering all of this evidence, it seems that the original HSOPSC questionnaire <sup>59</sup> does not  
42 appear to perform well in different countries. Survey instruments that are designed for particular  
43 settings are tailored to meet the unique characteristics and contexts of the local setting and  
44 population. In the case of the HSOPSC, a number of the reported adaptations have performed less  
45 well than the original tool <sup>28 31 73 74 80</sup>. This might be due to the contextual specificity of the construct  
46 of safety culture <sup>81</sup>. Other factors include unique country characteristics, types of health systems  
47 and settings, staff groups, and cultural differences <sup>27 82</sup>. Hedsköld, et al. <sup>78</sup> pointed out that such  
48 differences might weaken the validity of the instrument.  
49  
50  
51  
52  
53  
54  
55  
56  
57  
58  
59  
60



1  
2  
3  
4 In a review of quantitative patient safety culture instruments, it was concluded that all of the  
5 surveys designed for general administration to hospital personnel addressed three common  
6 dimensions: management support and commitment to safety, communication openness and  
7 teamwork Singla, et al. <sup>11</sup>. They suggested that these common dimensions might be considered  
8 “core dimensions” of patient safety culture. In addition, a number of dimensions seem to be  
9 common among optimal factor models across different countries.  
10  
11  
12  
13

14  
15 Factor structure of the optimal model of our study compared with optimal models that were  
16 developed in Saudi Arabia, Palestine, England, Scotland, Netherlands, Turkey and Switzerland in  
17 addition to the original USA HSOPSC questionnaire <sup>59</sup> is shown in online appendix 5. This  
18 comparison is aimed at identifying a common set of patient safety culture dimensions across  
19 different countries.  
20  
21  
22  
23

24  
25 Six studies reported different dimensions combined into one dimension. A significant degree of  
26 overlap in the content of the safety culture dimensions exists. As a result, included items in certain  
27 dimensions tend to load onto differently labeled dimensions. “Feedback and communication about  
28 error” and “Communication openness” were grouped into one dimension in the Palestinian, Swiss  
29 and Scottish studies respectively <sup>27 61 79</sup>. This result is expected as both dimensions are closely  
30 related. Feedback and communication with staff about errors and discussing ways to prevent them  
31 are linked to allowing staff to freely speak up, if they see something that might negatively affect  
32 patient care.  
33  
34  
35  
36  
37  
38  
39  
40

41 Cox and Flin <sup>1</sup> suggest that the nature of safety climate is “context-dependent.” Keiser <sup>83</sup> argues  
42 that since safety climate measures include both general and contextualized items, excluding  
43 contextual measures might provide a rather deficient evaluation of the underlying safety climate  
44 construct. Thus, research currently supports the idea of integrating both qualitative and quantitative  
45 methods in developing a culturally appropriate instrument as standard approaches that exclusively  
46 rely on translation and quantitative validation may not be sufficient to produce an instrument that  
47 is applicable to the local context <sup>74</sup>. As a result, the adopted tool will be able to reflect important  
48 safety climate themes that are specific to the local healthcare context.  
49  
50  
51  
52  
53  
54  
55  
56  
57  
58  
59  
60



1  
2  
3 A number of common dimensions that were emerging rather consistently across international  
4 settings despite the lack of confirmation of the original factor structure of the HSOPSC in  
5 numerous studies. Those dimensions include: management support for patient safety, supervisors'  
6 action promoting patient safety, teamwork within and across units, handoffs and transitions, non-  
7 punitive response to error, frequency of incidents reported, communication openness and  
8 organisational learning.  
9

10  
11  
12  
13  
14  
15 The item composition of each factor of the optimal model of our study was compared with optimal  
16 models that were developed in Saudi Arabia, Palestine, England, Netherlands, Turkey and  
17 Switzerland in addition to the original USA HSOPSC questionnaire<sup>59</sup>. This comparison is aimed  
18 at identifying a common set of patient safety climate items across different countries (see  
19 Appendix 6). The different adaptations of the HSOPSC did not confirm the original factor  
20 structure of the HSOPSC<sup>59</sup>. Still, some dimensions corresponded to the ones proposed in the  
21 original HSOPSC model and items were repeated across the different studies. It should be noted  
22 that not all studies reported their optimum factor model structure. As a result, this created a  
23 difficulty in identifying the structure of the common dimensions across different countries.  
24  
25  
26  
27  
28  
29  
30  
31

## 32 **STRENGTHS AND LIMITATIONS**

33  
34 This is the first validation study of a standardised safety climate measure in a Kuwaiti healthcare  
35 setting. The study assessed the psychometric properties of the HSOPSC questionnaire and  
36 constructed an optimal model for assessing patient safety climate in Kuwaiti hospitals. To examine  
37 the psychometric properties of the HSOPSC, a rigorous and scientific psychometric approach was  
38 designed and executed based on recommended reporting practices. Furthermore, strengths of both  
39 EFA and CFA analytical techniques were used to test the original HSOPSC model and construct  
40 an optimal model. Additionally, the researcher attempted to report all parameter estimates required  
41 for the reader to make valid interpretations of the results. Also, a large sample size (n=1280)  
42 allowed for the dataset to be split and for factor analysis, including EFA and CFA, to be undertaken  
43 with acceptable model fit indices.  
44  
45  
46  
47  
48  
49  
50

51 One limitation of this study is the number of items per factor in the optimal model. Three factors  
52 contained only two items per factor in the final Eight factor model. This is less than the  
53  
54  
55  
56  
57  
58  
59  
60

recommended minimum of three items per factor. However, the items reported high loadings with strong theoretical sense. Also, similar findings were reported in the literature.

Another limitation is the exclusion of partially answered questionnaires. As a result, a subset of the total sample, with all items answered, was used for the validation of the psychometric properties of the HSOPSC. Data imputation techniques were avoided due to their potential impact on the tool's reliability and construct validity estimates and in order to minimise any possible biases. This led to a more uniform sample.

## CONCLUSION

This is the first validation study of a patient safety climate questionnaire conducted in a Kuwaiti healthcare setting. The results clearly indicate the need for caution when using the original version of the HSOPSC questionnaire<sup>59</sup> and highlight the importance of appropriate validation of safety climate surveys before applying them to different populations and healthcare contexts than those in which they were originally developed. The study also shows the original composition of the HSOPSC dimensions was not confirmed in most studies. When compared to the USA, the HSOPSC questionnaire may be assessing different dimensions of safety culture across different countries including Kuwait<sup>59</sup>. More work is needed on cross-cultural investigations of differences in dimensionality to allow comparisons of healthcare safety climate results at an international level<sup>27 41</sup>. This study provided comparative data on the use of the HSOPSC questionnaire internationally and nine common dimensions and items were identified when comparing the different studies that reported their optimum models. The optimal factor model that was constructed in this study can be used as a basis for measuring patient safety climate in Kuwaiti hospitals and in evaluating changes in safety climate over time as part of patient safety improvement initiatives.

### **Acknowledgement:**

We would like to thank every MOH staff member who took time to participate in this project despite their workload and endless commitments in order to contribute to a safer healthcare.

### **Funding:**

None.

### **Competing interests:**

1  
2  
3 None declared.  
4

5 **Authors' contributions:**

6 GA, PB and JM made considerable contributions to conception and design of the psychometric  
7 evaluation.  
8

9  
10 GA completed the psychometric assessment and development of the final eight-factor model.

11 GA was involved in drafting the manuscript while JM and PB have done revising the drafts.

12  
13 All authors have given final approval of the version to be published and agreed to be accountable  
14 for all aspects of the work in ensuring that questions related to the accuracy or integrity of any part  
15 of the work are appropriately investigated and resolved.  
16

17  
18 All authors read and approved the final manuscript.

19  
20 **Ethics approval:**

21 Ethical approval was sought from the Medical, Veterinary and Life Sciences College ethics  
22 committee of the University of Glasgow in Scotland and the Medical and Health Sciences  
23 Research Committee of the Ministry of Health in Kuwait.  
24  
25

26  
27 **Provenance and peer review:**

28 Not commissioned; externally peer reviewed.  
29

30  
31 **Data sharing statement:**

32 Data are available. Please contact corresponding author.  
33  
34  
35  
36  
37  
38  
39  
40

41 **REFERENCES**

- 42  
43 1. Cox S, Flin R. Safety culture: philosopher's stone or man of straw? *Work & stress*  
44 1998;12(3):189-201.  
45  
46 2. Perrow C. A personal note on normal accidents. *Organization & environment* 2004;17(1):9-  
47 14.  
48  
49 3. Reason J. Combating omission errors through task analysis and good reminders. *Quality and*  
50 *Safety in Health Care* 2002;11(1):40-44.  
51  
52 4. Mearns KJ, Flin R. Assessing the state of organizational safety—culture or climate? *Current*  
53 *Psychology* 1999;18(1):5-17.  
54  
55  
56  
57  
58  
59  
60

- 1
- 2
- 3
- 4 5. Flin R, Burns C, Mearns K, et al. Measuring safety climate in health care. *Qual Saf Health Care* 2006;15:109 - 15.
- 5
- 6
- 7 6. Hellings J, Schrooten W, Klazinga N, et al. Challenging patient safety culture: survey results. *International Journal of Health Care Quality Assurance* 2007;20(7):620-32.
- 8
- 9
- 10 7. Smits M, Groenewegen PP, Timmermans DRM, et al. The nature and causes of unintended events reported at ten emergency departments. *BMC Emergency Medicine* 2009;9:16.
- 11
- 12
- 13 8. Blegen MA, Gearhart S, O'Brien R, et al. AHRQ's hospital survey on patient safety culture: psychometric analyses. *Journal of Patient Safety* 2009;5(3):139-44.
- 14
- 15
- 16 9. Lee T, Harrison K. Assessing safety culture in nuclear power stations. *Safety science* 2000;34(1):61-97.
- 17
- 18
- 19 10. Colla J, Bracken A, Kinney L, et al. Measuring patient safety climate: a review of surveys. *Qual Saf Health Care* 2005;14:364 - 66.
- 20
- 21
- 22 11. Singla AK, Kitch BT, Weissman JS, et al. Assessing patient safety culture: a review and synthesis of the measurement tools. *Journal of Patient Safety* 2006;2(3):105-15.
- 23
- 24
- 25 12. Fleming M. Patient safety culture measurement and improvement: a "how to" guide. *Healthc Q* 2005;8(Spec No):14-19.
- 26
- 27
- 28 13. Jackson J, Sarac C, Flin R. Hospital safety climate surveys: measurement issues. *Current Opinion in Critical Care* 2010;16(6):632-8.
- 29
- 30
- 31 14. Halligan M, Zecevic A. Safety culture in healthcare: a review of concepts, dimensions, measures and progress. *BMJ quality & safety* 2011;20(4):338-43.
- 32
- 33
- 34 15. Pumar-Méndez MJ, Attree M, Wakefield A. Methodological aspects in the assessment of safety culture in the hospital setting: A review of the literature. *Nurse education today* 2014;34(2):162-70.
- 35
- 36
- 37 16. Sammer CE, Lykens K, Singh KP, et al. What is patient safety culture? A review of the literature. *Journal of Nursing Scholarship* 2010;42(2):156-65.
- 38
- 39
- 40 17. Flin R. Measuring safety culture in healthcare: A case for accurate diagnosis. *Safety Science* 2007;45:653-67.
- 41
- 42
- 43 18. Nieva VF, Sorra J. Safety culture assessment: a tool for improving patient safety in healthcare organizations. *Qual Saf Health Care* 2003;12 Suppl 2:ii17-23.
- 44
- 45
- 46 19. Alabdaly S. About the scandal of fatal errors in Adan Hospital. *Alaan Newspaper* 2009 11 January 2009.
- 47
- 48
- 49 20. Salama F. Medical errors kill a quarter of a million Americans a year. *Alqabas newspaper* 2016 5 May 2016.
- 50
- 51
- 52 21. Sami A. Medical errors, an obsession that worries everyone. *Aljarida newspaper* 2015 3 September 2015.
- 53
- 54
- 55 22. Sorra JS, Dyer N. Multilevel psychometric properties of the AHRQ hospital survey on patient safety culture. *BMC Health Services Research* 2010;10(1):199.
- 56
- 57
- 58
- 59
- 60

23. Sorra J, Nieva V. Hospital Survey on Patient Safety Culture. AHRQ Publication No. 04-0041. Rockville, MD: Agency for Healthcare Research and Quality, September 2004, 2007.
24. Sorra J, Famolaro T, Dyer MN, et al. Hospital Survey on Patient Safety Culture: 2010 User Comparative Database Report. Rockville, MD, 2010.
25. Measuring hospital safety culture: Testing the HSOPSC scale. Proceedings of the Human Factors and Ergonomics Society; 2010.
26. Bodur S, Filiz E. Validity and reliability of Turkish version of "hospital Survey on Patient Safety Culture" and perception of patient safety in public hospitals in Turkey. *BMC Health Services Research* 2010;10
27. Pfeiffer Y, Manser T. Development of the German version of the Hospital Survey on Patient Safety Culture: Dimensionality and psychometric properties. *Safety Science* 2010;48(10):1452-62.
28. Perneger TV, Staines A, Kundig F. Internal consistency, factor structure and construct validity of the French version of the Hospital Survey on Patient Safety Culture. *BMJ quality & safety* 2014;23(5):389-97.
29. Haugen AS, Sjøfteland E, Eide GE, et al. Patient safety in surgical environments: cross-countries comparison of psychometric properties and results of the Norwegian version of the Hospital Survey on Patient Safety. *BMC health services research* 2010;10(1):1.
30. Smits M, Christiaans-Dingelhoff I, Wagner C, et al. The psychometric properties of the 'Hospital Survey on Patient Safety Culture' in Dutch hospitals. *BMC Health Services Research* 2008;8:230.
31. Waterson P, Griffiths P, Stride C, et al. Psychometric properties of the Hospital Survey on Patient Safety Culture: findings from the UK. *Quality and Safety in Health Care* 2010;19(5):e2-e2.
32. Agency for Healthcare Research and Quality. International Use of the Surveys on Patient Safety Culture Rockville, MD2015 [Available from: <http://www.ahrq.gov/professionals/quality-patient-safety/patientsafetyculture/pscintusers.html> accessed 3 February 2016.
33. Gerrish K, Lacey A. The research process in nursing. Chichester: John Wiley & Sons 2010.
34. Sarantakos S. Social research: Palgrave Macmillan 2012.
35. Tinsley HE, Tinsley DJ. Uses of factor analysis in counseling psychology research. *Journal of counseling psychology* 1987;34(4):414.
36. Tabachnick BG, Fidell LS. Using multivariate statistics. Boston, MA: Allyn & Bacon 2007.
37. Cho YI, Johnson TP, VanGeest JB. Enhancing surveys of health care professionals: a meta-analysis of techniques to improve response. *Evaluation & the health professions* 2013;36(3):382-407.

- 1
- 2
- 3
- 4 38. McLeod CC, Klabunde CN, Willis GB, et al. Health care provider surveys in the United States, 2000–2010: a review. *Evaluation & the health professions* 2013;36(1):106-26.
- 5
- 6
- 7 39. Sorra J, Gray L, Streagle S. AHRQ Hospital Survey on Patient Safety Culture: User's Guide. Rockville, MD: Agency for Healthcare Research and Quality., 2016.
- 8
- 9
- 10 40. Allison PD. Missing data techniques for structural equation modeling. *Journal of abnormal psychology* 2003;112(4):545.
- 11
- 12
- 13 41. Hutchinson A, Cooper K, Dean J, et al. Use of a safety climate questionnaire in UK health care: factor structure, reliability and usability. *Quality and Safety in Health Care* 2006;15(5):347-53.
- 14
- 15
- 16 42. Hill T, Lewicki P, Lewicki P. Statistics: methods and applications: a comprehensive reference for science, industry, and data mining: StatSoft, Inc. 2006.
- 17
- 18
- 19 43. Gerbing DW, Hamilton JG. Viability of exploratory factor analysis as a precursor to confirmatory factor analysis. *Structural Equation Modeling: A Multidisciplinary Journal* 1996;3(1):62-72.
- 20
- 21
- 22
- 23 44. Henson RK, Roberts JK. Use of exploratory factor analysis in published research common errors and some comment on improved practice. *Educational and Psychological measurement* 2006;66(3):393-416.
- 24
- 25
- 26
- 27 45. Pett MA, Lackey NR, Sullivan JJ. Making sense of factor analysis: The use of factor analysis for instrument development in health care research. Thousand Oaks, CA: Sage Publications 2003.
- 28
- 29
- 30
- 31 46. Kline RB. Principles and practice of structural equation modeling. New York: Guilford publications 2015.
- 32
- 33
- 34 47. De Vellis RF, Dancer LS. Scale development: theory and applications. *Journal of Educational Measurement* 1991;31(1):79-82.
- 35
- 36
- 37 48. Field A. Discovering statistics using SPSS. London: Sage publications 2009.
- 38
- 39 49. Suhr D. Reliability, exploratory & confirmatory factor analysis for the scale of athletic priorities. *Diambil pada tanggal* 2003;2:274-28.
- 40
- 41
- 42 50. Kaiser HF. An index of factorial simplicity. *Psychometrika* 1974;39(1):31-36.
- 43
- 44 51. Hutcheson GD, Sofroniou N. The multivariate social scientist: Introductory statistics using generalized linear models: Sage 1999.
- 45
- 46
- 47 52. Amos (Version 23.0) [Computer Program]
- 48 [program]. Chicago: SPSS, 2014.
- 49
- 50 53. Hu L, Bentler P. Cutoff criteria for fit indexes in covariance structure analysis: Conventional criteria versus new alternatives. *Structural Equation Modelling* 1999;6(1):1 - 55.
- 51
- 52
- 53 54. Ullman JB. Structural equation modeling: Reviewing the basics and moving forward. *Journal of personality assessment* 2006;87(1):35-50.
- 54
- 55
- 56
- 57
- 58
- 59
- 60



- 1  
2  
3  
4 55. Cattell RB. The scree test for the number of factors. *Multivariate behavioral research*  
5 1966;1(2):245-76.
- 6  
7 56. Beavers AS, Lounsbury JW, Richards JK, et al. Practical considerations for using exploratory  
8 factor analysis in educational research. *Practical assessment, research & evaluation*  
9 2013;18(6):1-13.
- 10  
11 57. Exploratory or confirmatory factor analysis? SAS Users Group International Conference  
12 2006; Cary: SAS Institute, Inc.
- 13  
14 58. Kline P. An easy guide to factor analysis. London; Newyork, N.Y.: Routledge 2014.
- 15  
16 59. Sorra J, Nieva V. Hospital Survey on Patient Safety Culture. Rockville, MD: Agency for  
17 Healthcare Research and Quality (AHRQ), 2004.
- 18  
19 60. Alonazi MS. An evaluation of a patient safety culture tool in Saudi Arabia. The University of  
20 Sheffield, 2011.
- 21  
22 61. Najjar S, Hamdan M, Baillien E, et al. The Arabic version of the hospital survey on patient  
23 safety culture: a psychometric evaluation in a Palestinian sample. *BMC health services*  
24 *research* 2013;13(1):1.
- 25  
26 62. Al-Awa B, Al Mazrooa A, Rayes O, et al. Benchmarking the post-accreditation patient safety  
27 culture at King Abdulaziz University Hospital. *Annals of Saudi medicine* 2012;32(2)
- 28  
29 63. Alahmadi H. Assessment of patient safety culture in Saudi Arabian hospitals. *Quality and*  
30 *Safety in Health Care* 2010;19(5):1-5.
- 31  
32 64. El-Jardali F, Jaafar M, Dimassi H, et al. The current state of patient safety culture in  
33 Lebanese hospitals: a study at baseline. *International Journal for Quality in Health Care*  
34 2010;22(5):386-95.
- 35  
36 65. El-Jardali F, Dimassi H, Jamal D, et al. Predictors and outcomes of patient safety culture in  
37 hospitals. *BMC Health Services Research* 2011;11(1):1.
- 38  
39 66. Al-Mandhari A, Al-Zakwani I, Al-Kindi M, et al. Patient safety culture assessment in Oman.  
40 *Oman medical journal* 2014;29(4):264-71.
- 41  
42 67. Bahrami MA, Montazeralfaraj R, Chalak M, et al. Patient safety culture challenges: Survey  
43 results of iranian educational hospitals. *Middle East J Sci Res* 2013;14(5):641-9.
- 44  
45 68. El-Jardali F, Sheikh F, Garcia NA, et al. Patient safety culture in a large teaching hospital in  
46 Riyadh: baseline assessment, comparative analysis and opportunities for improvement.  
47 *BMC health services research* 2014;14(1):1.
- 48  
49 69. Eiras M, Escoval A, Grillo IM, et al. The hospital survey on patient safety culture in  
50 Portuguese hospitals: instrument validity and reliability. *International Journal of Health*  
51 *Care Quality Assurance* 2014;27(2):111-22.
- 52  
53 70. Andrade LELd, Melo LOMd, Silva IGd, et al. Adaptation and validation of the Hospital Survey  
54 on Patient Safety Culture in an electronic Brazilian version. *Epidemiologia e Serviços de*  
55 *Saúde* 2017;26(3):455-68.

- 1  
2  
3  
4 71. Sarac C, Flin R, Mearns K, et al. Hospital survey on patient safety culture: psychometric  
5 analysis on a Scottish sample. *BMJ Quality & Safety* 2011;20(10):842-8.  
6  
7 72. Brborovic H, Sklebar I, Brborovic O, et al. Development of a Croatian version of the US  
8 hospital survey on patient safety culture questionnaire: Dimensionality and  
9 psychometric properties. *Postgraduate Medical Journal* 2014;90(1061):125-32.  
10  
11 73. Haugen AS, Softeland E, Eide GE, et al. Patient safety in surgical environments: cross-  
12 countries comparison of psychometric properties and results of the Norwegian version  
13 of the Hospital Survey on Patient Safety. *BMC Health Services Research* 2010;10:279.  
14  
15 74. Zhu J, Li L, Zhao H, et al. Development of a patient safety climate survey for Chinese  
16 hospitals: Cross-national adaptation and psychometric evaluation. *BMJ Quality and  
17 Safety* 2014;23(10):847-56.  
18  
19 75. Reis CT, Laguardia J, Vasconcelos AGG, et al. Reliability and validity of the Brazilian version  
20 of the Hospital Survey on Patient Safety Culture (HSOPSC): a pilot study. *Cadernos de  
21 Saúde Pública* 2016;32(11)  
22  
23 76. Robida A. Hospital Survey on Patient Safety Culture in Slovenia: a psychometric evaluation.  
24 *International Journal for Quality in Health Care* 2013;25(4):469-75.  
25  
26 77. Brajshori N, Behrens J. Translation, Cultural Adaption and Validation of Hospital Survey on  
27 Patient Safety Culture in Kosovo. *Open Journal of Nursing* 2016;6(06):483.  
28  
29 78. Hedsköld M, Pukk-Härenstam K, Berg E, et al. Psychometric properties of the hospital survey  
30 on patient safety culture, HSOPSC, applied on a large Swedish health care sample. *BMC  
31 Health Services Research* 2013;13  
32  
33 79. Saraç Ç. Safety climate in acute hospitals. University of Aberdeen, 2011.  
34  
35 80. Nie Y, Mao X, Cui H, et al. Hospital survey on patient safety culture in China. *BMC Health  
36 Services Research* 2013;13  
37  
38 81. Coyle IR, Sleeman SD, Adams N. Safety climate. *Journal of Safety Research* 1995;26(4):247-  
39 54.  
40  
41 82. Ginsburg L, Gilin D, Tregunno D, et al. Advancing measurement of patient safety culture.  
42 *Health services research* 2009;44(1):205-24.  
43  
44 83. Keiser NL. An Empirical Test of Context-Specific Safety Climate Measurement: A Comparison  
45 of Five Research Laboratory Safety Climate Measures to a General Measure of Safety  
46 Climate [Master's Thesis]. Texas A & M University, 2015.  
47  
48  
49  
50  
51  
52  
53  
54  
55  
56  
57  
58  
59  
60



**Box 1: HSOPSC patient safety culture dimensions and definitions**<sup>39</sup>

| Patient Safety Culture Composite       | Definition: The extent to which...                                                                                                                       |
|----------------------------------------|----------------------------------------------------------------------------------------------------------------------------------------------------------|
| Communication Openness                 | Staff freely speak up if they see something that may negatively affect a patient and feel free to question those with more authority.                    |
| Feedback and Communication About Error | Staff are informed about errors that happen, are given feedback about changes implemented, and discuss ways to prevent errors.                           |
| Frequency of Events Reported           | Mistakes of the following types are reported: (1) mistakes caught and corrected before affecting the patient, (2) mistakes with no potential to harm the |

|                                                                      |                                                                                                                                                                                  |
|----------------------------------------------------------------------|----------------------------------------------------------------------------------------------------------------------------------------------------------------------------------|
|                                                                      | patient, and (3) mistakes that could harm the patient but do not.                                                                                                                |
| Handoffs and Transitions                                             | Important patient care information is transferred across hospital units and during shift changes.                                                                                |
| Management Support for Patient Safety                                | Hospital management provides a work climate that promotes patient safety and shows that patient safety is a top priority.                                                        |
| Non-punitive Response to Error                                       | Staff feel that their mistakes and event reports are not held against them and that mistakes are not kept in their personnel file.                                               |
| Organizational Learning—Continuous Improvement                       | Mistakes have led to positive changes and changes are evaluated for effectiveness.                                                                                               |
| Overall Perceptions of Patient Safety                                | Procedures and systems are good at preventing errors and there is a lack of patient safety problems.                                                                             |
| Staffing                                                             | There are enough staff to handle the workload and work hours are appropriate to provide the best care for patients.                                                              |
| Supervisor/Manager Expectations and Actions Promoting Patient Safety | Supervisors/managers consider staff suggestions for improving patient safety, praise staff for following patient safety procedures, and do not overlook patient safety problems. |
| Teamwork Across Units                                                | Hospital units cooperate and coordinate with one another to provide the best care for patients.                                                                                  |
| Teamwork Within Units                                                | Staff support each other, treat each other with respect, and work together as a team.                                                                                            |

### Figure legends:

**Figure 1 title: Scree plot of the final EFA solution (Eight factors, 22 items)**

**Box 1: HSOPSC patient safety culture dimensions and definitions 39**

1  
2  
3  
4  
5  
6  
7  
8  
9  
10  
11  
12  
13  
14  
15  
16  
17  
18  
19  
20  
21  
22  
23  
24  
25  
26  
27  
28  
29  
30  
31  
32  
33  
34  
35  
36  
37  
38  
39  
40  
41  
42  
43  
44  
45  
46  
47  
48  
49  
50  
51  
52  
53  
54  
55  
56  
57  
58  
59  
60

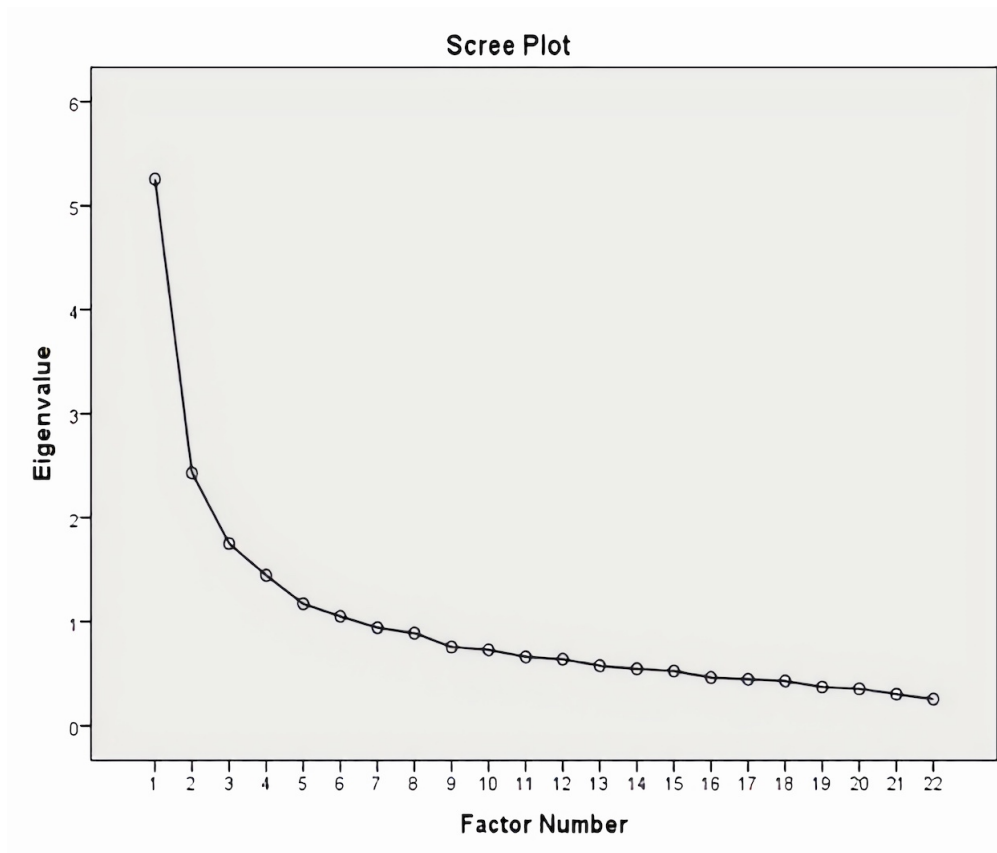

Scree plot of the final EFA solution (Eight factors, 22 items)

105x90mm (300 x 300 DPI)

**Appendix 1: Professional and personal characteristics of study respondents (n=1,310)**

| <b>Variable</b>        | <b>Category</b>                             | <b>Frequency (n)</b> | <b>Percentage (%)</b> |
|------------------------|---------------------------------------------|----------------------|-----------------------|
| Staff Position         | Assistant Nurse                             | 30                   | 2.4                   |
|                        | Nurse                                       | 697                  | 55.0                  |
|                        | Head nurse/Nurse manager                    | 27                   | 2.1                   |
|                        | Unit Assistant/Clerk                        | 4                    | 0.3                   |
|                        | Attending/Staff Physician                   | 227                  | 17.9                  |
|                        | Resident Physician/Physician in training    | 41                   | 3.2                   |
|                        | Pharmacist                                  | 21                   | 1.7                   |
|                        | Dietician                                   | 10                   | 0.8                   |
|                        | Respiratory Therapist                       | 3                    | 0.2                   |
|                        | Physical, Occupational, or Speech Therapist | 18                   | 1.4                   |
|                        | Technician                                  | 176                  | 13.9                  |
|                        | Management                                  | 13                   | 1.0                   |
| Gender                 | Male                                        | 479                  | 37.2                  |
|                        | Female                                      | 808                  | 62.8                  |
| Direct Patient Contact | Yes                                         | 1112                 | 88.5                  |
|                        | No                                          | 144                  | 11.5                  |

**Appendix 2:**  
**Conclusion from the solutions with different numbers of the factors (12- 9-8-7-10-11)**

| Step | Number of extracted factors | Number of the satisfactory factors | Total variance explained by extracted factors | Items not loading      | Items which have low communalities (<0.3)       | Items which have low loadings (<0.4)         |
|------|-----------------------------|------------------------------------|-----------------------------------------------|------------------------|-------------------------------------------------|----------------------------------------------|
| 1    | 12                          | 8                                  | 45                                            | A5- A11- A15- A17      | A5-A7-A9-A10- A11-A15-A17                       | A13- B3-D9- A6- C1-C5- A10- A7- D11- A18- C3 |
| 4    | 9                           | 7                                  | 41.0                                          | A5 - A9- A15- A17-A7   | A2-A5-A7-A9- A10-A15-A17                        | D9- B3- C5- A10- A2-A11                      |
| 5    | 8                           | 6                                  | 39.2                                          | A5-A15-A17-A9          | A2 - A5- A7- A9- A10- A11-A15- A17              | A13-D9- C5-A6- B3- A10-A7- A2- A11           |
| 6    | 7                           | 5                                  | 37.4                                          | A11-A5-A7-A9- A15- A17 | A2 - A5- A7- A9- A10 - A11- A15- A17- B3 -C3-D6 | C3-A18-A13- C1- A2- B4-B3-A10                |
| 7    | 11                          | 9                                  | 43.8                                          | A5-A7- A17             | A5- A7- A9- A10- A11- A15- A17- D6              | B3-D9- A6- A10- A9-A13- C5- A7- A11          |
| 8    | 10                          | 9                                  | 42.6                                          | A5-A7- A17 A9          | A5 - A7- A9- A10 - A11- A15- A17- D6            | A13-D9- C5- A10- A11                         |

An investigation of five possible solutions was undertaken in steps 4-8 to explore the number of factors that could be extracted. The initial solution with 12 factors demonstrates that 8 factors could fit the 42 safety climate items. The 9 Factors solution demonstrates that 7 factors could fit the 42 safety climate items. The 8 Factors solution demonstrates that 6 factors could fit the 42 safety climate items. The 11 Factors solution demonstrates that 9 factors could fit the 42 safety climate items. The 10 Factors solution demonstrates that 9 factors fit the 42 safety climate items. The summary results of the six solutions including the initial solution are displayed in the above table. The comparison of the different solutions suggests that the 8 Factors solution is most

1  
2  
3 appropriate (four items without loadings, the initial solution with 12 factors indicates that 8  
4 factors is satisfactory, only one factor is without strongly loaded items).

5  
6 The optimal model is an Eight Factor model with 22 safety climate questionnaire items (20 items  
7 were excluded) that explains about 50.2% of the total variance. All factor loadings are within the  
8 range of 0.426-0.866. Five factors (Factor 2, Factor 3, Factor 4, Factor 6, and Factor 7) have  
9 three or more items with loadings  $>0.40$ . Factor 1, Factor 5, and Factor 8 have two items with  
10 very high loading  $>0.50$  and acceptable theoretical basis. There are no cross loaded items and  
11 there are no items with loadings  $<0.40$  in the solution. The solution is essentially consistent with  
12 the theoretical pattern. All factors consist of two to four items and all items within each factor are  
13 theoretically related. Only D6 moved from "Teamwork across units" into "Handoffs and  
14 Transitions." It should be noted that "Overall perceptions of patient safety", "Organisational  
15 learning—Continuous improvement", "Staffing" and "Feedback and communication about  
16 error" have no items in the final 8 factor solution.

17  
18 In summary, the optimal Eight Factor model shows good psychometric properties with no cross  
19 loaded items and there are no items with loadings  $<0.40$  in the solution. All factors consist of two  
20 to four items and all items within each factor are theoretically related. The optimal model of our  
21 study was confirmed by using CFA.  
22  
23  
24  
25  
26  
27  
28  
29  
30  
31  
32  
33  
34  
35  
36  
37  
38  
39  
40  
41  
42  
43  
44  
45  
46  
47  
48  
49  
50  
51  
52  
53  
54  
55  
56  
57  
58  
59  
60

**Appendix 3:**  
**HSOPSC Eight factor model in Kuwait and individual item standardised path coefficients**

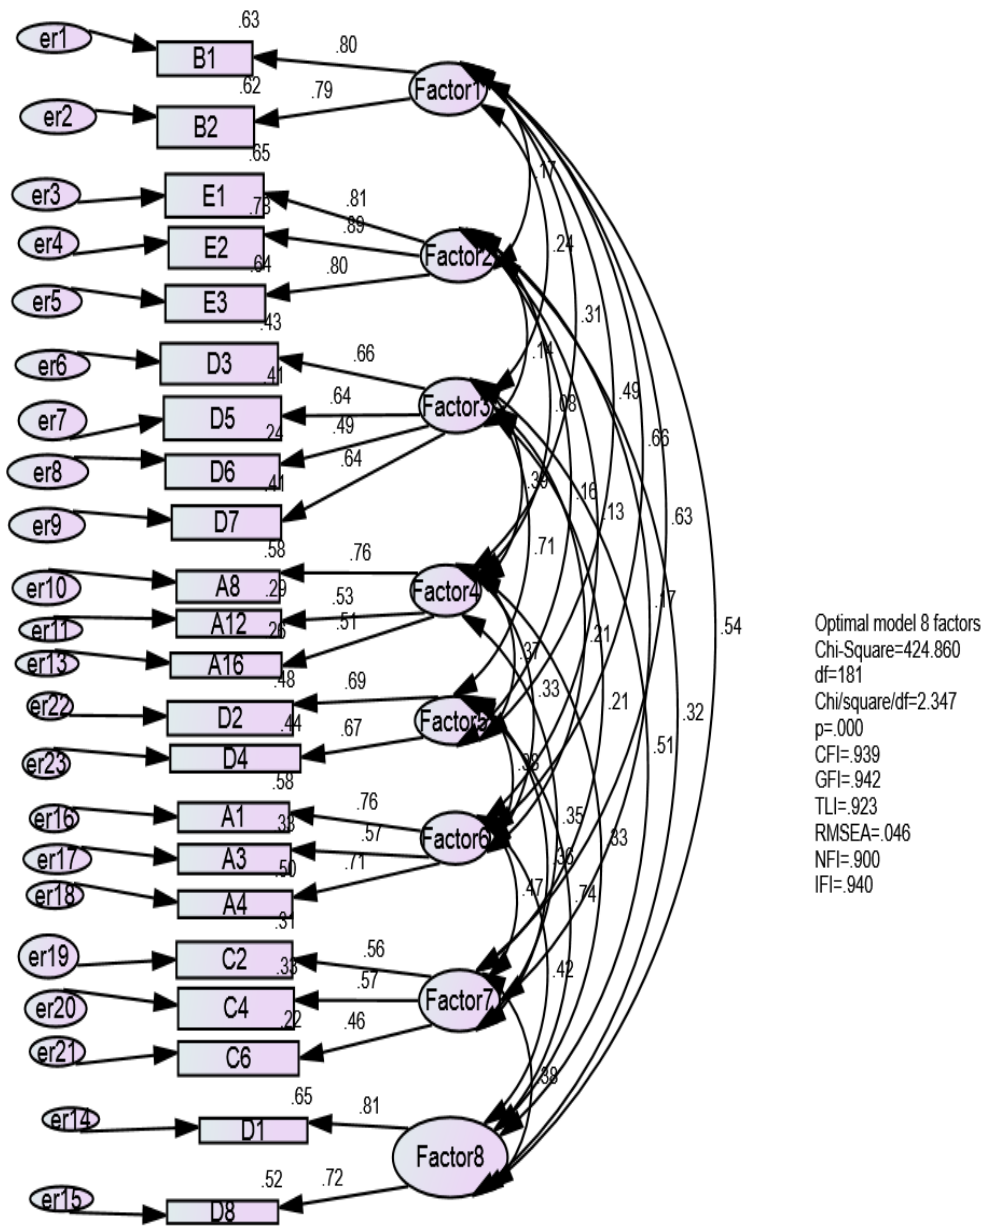

#### Appendix 4: Inter-correlations between Eight factors (scales)

| N | Scales                                                               | 1        | 2        | 3        | 4        | 5        | 6        | 7        |
|---|----------------------------------------------------------------------|----------|----------|----------|----------|----------|----------|----------|
| 1 | Supervisor/Manager Expectations and Actions Promoting Patient Safety | -        |          |          |          |          |          |          |
| 2 | Frequency of Events Reported                                         | 0,155*** |          |          |          |          |          |          |
| 3 | Handoffs and Transitions                                             | 0,286*** | 0,183*** |          |          |          |          |          |
| 4 | Non-punitive Response to Errors                                      | 0,339*** | 0,133*** | 0,371*** |          |          |          |          |
| 5 | Teamwork Across Units                                                | 0,51***  | 0,228*** | 0,64***  | 0,435*** |          |          |          |
| 6 | Teamwork Within Units                                                | 0,664*** | 0,105**  | 0,236*** | 0,356*** | 0,392*** |          |          |
| 7 | Communication Openness                                               | 0,614*** | 0,088*   | 0,259*** | 0,431*** | 0,404*** | 0,517*** |          |
| 8 | Management Support for Patient Safety                                | 0,519*** | 0,311*** | 0,531*** | 0,322*** | 0,722*** | 0,432*** | 0,353*** |

\*\*\* p<0.001, \*\* p<0.01, \*p<0.05



**Appendix 5: Dimensions of HSOPSC for USA (US), Kuwait (KWT), Saudi Arabia (SA), Palestine (PAL), England (ENG), Scotland (SCO), Netherlands (NL), Turkey (TUR) and Switzerland (Swiss) factor models**

| HSOPSC Dimensions                                            | US<br>59 | KWT | SA<br>60 | PAL<br>61                              | ENG<br>31 | SCO<br>78                              | NL<br>30                                                              | TUR<br>26                                                                             | SWISS<br>27                            |
|--------------------------------------------------------------|----------|-----|----------|----------------------------------------|-----------|----------------------------------------|-----------------------------------------------------------------------|---------------------------------------------------------------------------------------|----------------------------------------|
| Supervisor/manager expectations and actions promoting safety | √        | √   | √        | √                                      | √         | √                                      | -                                                                     | -                                                                                     | √                                      |
| Organisational learning— continuous improvement              | √        | -   | √        | √                                      | -         | √                                      | √                                                                     | √                                                                                     | √<br>With<br>Teamwork<br>within units  |
| Teamwork within hospital units                               | √        | √   | √        | √                                      | √         | √                                      | √                                                                     | √                                                                                     | -                                      |
| Communication openness                                       | √        | √   | √        | -                                      | √         | -                                      | √                                                                     | √                                                                                     | -                                      |
| Feedback and communication about error                       | √        | -   | -        | √<br>With<br>Communication<br>Openness | √         | √<br>With<br>Communication<br>Openness | √<br>With<br>Organisational<br>learning—<br>continuous<br>improvement | √<br>With<br>Supervisor<br>expectations<br>and actions<br>promoting<br>patient safety | √<br>With<br>Communication<br>Openness |
| Non-punitive response to error                               | √        | √   | √        | √                                      | √         | √                                      | √                                                                     | √                                                                                     | √                                      |
| Staffing                                                     | √        | -   | √        | √                                      | -         | -                                      | √                                                                     | √                                                                                     | -                                      |
| Hospital management support for patient safety               | √        | √   | -        | √                                      | -         | √                                      | √                                                                     | √<br>With<br>Teamwork<br>across units                                                 | √                                      |

1  
2  
3  
4  
5  
6  
7  
8  
9  
10  
11  
12  
13  
14  
15  
16  
17  
18  
19  
20  
21  
22  
23  
24  
25  
26  
27  
28  
29  
30  
31  
32  
33  
34  
35  
36  
37  
38  
39  
40  
41  
42  
43  
44  
45  
46  
47

| <b>HSOPSC Dimensions</b>              | <b>US<br/>59</b> | <b>KWT</b> | <b>SA<br/>60</b> | <b>PAL<br/>61</b> | <b>ENG<br/>31</b>  | <b>SCO<br/>78</b>  | <b>NL<br/>30</b> | <b>TUR<br/>26</b> | <b>SWISS<br/>27</b>                   |
|---------------------------------------|------------------|------------|------------------|-------------------|--------------------|--------------------|------------------|-------------------|---------------------------------------|
| Teamwork across hospital units        | √                | √          | -                | √                 | √                  | √                  | √                | -                 | -                                     |
| Hospital handoffs and transitions     | √                | √          | √                | √                 | √                  | √                  | √                | √                 | √<br>With<br>Teamwork<br>across units |
| Frequency of incident reporting       | √                | √          | √                | √                 | √                  | √                  | √                | √                 | √                                     |
| Overall perceptions of patient safety | √                | -          | -                | √                 | √<br>With Staffing | √<br>With Staffing | √                | √                 | √<br>With Staffing                    |
| Number of optimal model factors       | 12               | 8          | 8                | 11                | 9                  | 10                 | 11               | 10                | 8                                     |

**Appendix 6: Item composition of dimensions of HSOPSC for USA (US), Kuwait (KWT), Saudi Arabia (SA), England (ENG), Palestine (PAL), Switzerland (Swiss), Netherlands (NL), and Turkey (TUR) factor models**

| HSOPSC Factors                                                       | USA <sup>59</sup> | Kuwait        | SA <sup>60</sup> | ENG <sup>31</sup> | PAL <sup>61</sup> | SWISS <sup>27</sup>        | NL <sup>30</sup>        | TUR <sup>26</sup> |
|----------------------------------------------------------------------|-------------------|---------------|------------------|-------------------|-------------------|----------------------------|-------------------------|-------------------|
| Supervisor/Manager Expectations and Actions Promoting Patient Safety | B1-B2-B3-B4       | B1-B2         | B1-B2            | B1-B2             | B1-B2-B3-B4       | B1-B2-B3-B4                | B1-B2-B3-B4             | ‡                 |
| Frequency of Events Reported                                         | E1-E2-E3*         | E1-E2-E3      | E1-E2-E3         | E1-E2-E3          | E1-E2-E3          | E1-E2-E3                   | E1-E2-E3                | E1-E2-E3          |
| Handoffs and Transitions                                             | D3-D5-D7-D11*     | D3-D5-D7-D6** | D5-D7-D11-D6**   | D3-D5-D7-D11      | D3-D5-D7-D11      | ‡                          | D5-D11                  | D3-D5-D7-D11      |
| Non-punitive Response to Errors                                      | A8-A12-A16        | A8-A12-A16    | A8-A12-A16       | A8-A16            | A8-A12-A16        | A8-A12-A16                 | A8-A12-A16              | A8-A12-A16        |
| Teamwork Across Units                                                | D2-D4-D6-D10*     | D2-D4         | -                | D2-D4-D6-D10      | D2-D4-D6-D10      | D2-D4-D6-D10-D3**<br>-D7** | D2-D4-D10-D3**<br>-D7** | ‡                 |
| Teamwork Within Units                                                | A1-A3-A4-A11      | A1-A3-A4      | A1-A3-A4         | A1-A3-A4          | A1-A3-A4-A11      | A1-A3-A4-A6-A9-A13‡        | A1-A3-A4-A11            | A1-A3-A4-A11      |
| Communication Openness                                               | C2-C4-C6          | C2-C4-C6      | C2-C4            | C2-C4-C6          | C2-C4-C3-C5‡      | ‡                          | C2-C4-C6                | C2-C4-C6          |

| <b>HSOPSC Factors</b>                          | <b>USA</b><br>59 | <b>Kuwait</b> | <b>SA</b><br>60 | <b>ENG</b><br>31 | <b>PAL</b><br>61 | <b>SWISS</b><br>27     | <b>NL</b><br>30    | <b>TUR</b><br>26      |
|------------------------------------------------|------------------|---------------|-----------------|------------------|------------------|------------------------|--------------------|-----------------------|
| Management Support for Patient Safety          | D1-D8-D9*        | D1-D8         | -               | -                | D1-D8-D9         | D1-D8-D9               | D1-D8-D9           | D1-D8-D9              |
| Organisational learning—continuous improvement | A6-A9-A13        | -             | A6-A9-A13-D8**  | -                | A6-A9-A13        | ‡                      | ‡                  | A6-A9-A13             |
| Feedback and communication about error         | C1-C3-C5         | -             | -               | C1-C3-C5         | ‡                | C1-C3-C5-C2-C4-C6‡     | C1-C3-C5-A6-A9-A13 | C1-C3-C5-B1-B2-B3-B4‡ |
| Staffing                                       | A2-A5-A7-A14     | -             | A5-A7           | A2-A14-A10-A17‡  | A2-A5-A14        | A2-A5-A14-A10-A17-A18‡ | A2-A5-A7           | A2-A5-A7-A14          |
| Overall perceptions of safety                  | A10-A15-A17-A18  | -             | -               | ‡                | A15-A17-A18      | ‡                      | A10-A17-A18-A14**  | A10-A15-A17-A18       |
| No of factors                                  | 12               | 8             | 8               | 9                | 11               | 8                      | 11                 | 10                    |

\*For comparison reasons, items with the letter F have been changed to letter D and items with the letter D have been changed to letter E as the modified version used in our study, ‡ denotes a merged dimension, \*\* denotes a moved item from a different dimension

1  
2  
3  
4  
5  
6  
7  
8  
9  
10  
11  
12  
13  
14  
15  
16  
17  
18  
19  
20  
21  
22  
23  
24  
25  
26  
27  
28  
29  
30  
31  
32  
33  
34  
35  
36  
37  
38  
39  
40  
41  
42  
43  
44  
45  
46  
47  
48  
49  
50  
51  
52  
53  
54  
55  
56  
57  
58  
59  
60

For peer review only

**STROBE 2007 (v4) Statement—Checklist of items that should be included in reports of *cross-sectional studies***

| Section/Topic                | Item # | Recommendation                                                                                                                                                                       | Reported on page # |
|------------------------------|--------|--------------------------------------------------------------------------------------------------------------------------------------------------------------------------------------|--------------------|
| <b>Title and abstract</b>    | 1      | (a) Indicate the study’s design with a commonly used term in the title or the abstract                                                                                               | 1                  |
|                              |        | (b) Provide in the abstract an informative and balanced summary of what was done and what was found                                                                                  | 2                  |
| <b>Introduction</b>          |        |                                                                                                                                                                                      |                    |
| Background/rationale         | 2      | Explain the scientific background and rationale for the investigation being reported                                                                                                 | 5                  |
| Objectives                   | 3      | State specific objectives, including any prespecified hypotheses                                                                                                                     | 6                  |
| <b>Methods</b>               |        |                                                                                                                                                                                      |                    |
| Study design                 | 4      | Present key elements of study design early in the paper                                                                                                                              | 7                  |
| Setting                      | 5      | Describe the setting, locations, and relevant dates, including periods of recruitment, exposure, follow-up, and data collection                                                      | 7                  |
| Participants                 | 6      | (a) Give the eligibility criteria, and the sources and methods of selection of participants                                                                                          | 8                  |
| Variables                    | 7      | Clearly define all outcomes, exposures, predictors, potential confounders, and effect modifiers. Give diagnostic criteria, if applicable                                             | -                  |
| Data sources/<br>measurement | 8*     | For each variable of interest, give sources of data and details of methods of assessment (measurement). Describe comparability of assessment methods if there is more than one group | 8                  |
| Bias                         | 9      | Describe any efforts to address potential sources of bias                                                                                                                            | 8                  |
| Study size                   | 10     | Explain how the study size was arrived at                                                                                                                                            | 7,8                |
| Quantitative variables       | 11     | Explain how quantitative variables were handled in the analyses. If applicable, describe which groupings were chosen and why                                                         | 7,8,9              |
| Statistical methods          | 12     | (a) Describe all statistical methods, including those used to control for confounding                                                                                                | -                  |
|                              |        | (b) Describe any methods used to examine subgroups and interactions                                                                                                                  | 8,9                |
|                              |        | (c) Explain how missing data were addressed                                                                                                                                          | 8                  |
|                              |        | (d) If applicable, describe analytical methods taking account of sampling strategy                                                                                                   | 8,9                |
|                              |        | (e) Describe any sensitivity analyses                                                                                                                                                | -                  |
| <b>Results</b>               |        |                                                                                                                                                                                      |                    |

|                          |     |                                                                                                                                                                                                              |             |
|--------------------------|-----|--------------------------------------------------------------------------------------------------------------------------------------------------------------------------------------------------------------|-------------|
| Participants             | 13* | (a) Report numbers of individuals at each stage of study—eg numbers potentially eligible, examined for eligibility, confirmed eligible, included in the study, completing follow-up, and analysed            | 9           |
|                          |     | (b) Give reasons for non-participation at each stage                                                                                                                                                         | 9           |
|                          |     | (c) Consider use of a flow diagram                                                                                                                                                                           | -           |
| Descriptive data         | 14* | (a) Give characteristics of study participants (eg demographic, clinical, social) and information on exposures and potential confounders                                                                     | Appendix 1  |
|                          |     | (b) Indicate number of participants with missing data for each variable of interest                                                                                                                          | 9           |
| Outcome data             | 15* | Report numbers of outcome events or summary measures                                                                                                                                                         | -           |
| Main results             | 16  | (a) Give unadjusted estimates and, if applicable, confounder-adjusted estimates and their precision (eg, 95% confidence interval). Make clear which confounders were adjusted for and why they were included | 9           |
|                          |     | (b) Report category boundaries when continuous variables were categorized                                                                                                                                    | -           |
|                          |     | (c) If relevant, consider translating estimates of relative risk into absolute risk for a meaningful time period                                                                                             | -           |
| Other analyses           | 17  | Report other analyses done—eg analyses of subgroups and interactions, and sensitivity analyses                                                                                                               | Appendix 2  |
| <b>Discussion</b>        |     |                                                                                                                                                                                                              |             |
| Key results              | 18  | Summarise key results with reference to study objectives                                                                                                                                                     | 15          |
| Limitations              | 19  | Discuss limitations of the study, taking into account sources of potential bias or imprecision. Discuss both direction and magnitude of any potential bias                                                   | 4           |
| Interpretation           | 20  | Give a cautious overall interpretation of results considering objectives, limitations, multiplicity of analyses, results from similar studies, and other relevant evidence                                   | 15,16       |
| Generalisability         | 21  | Discuss the generalisability (external validity) of the study results                                                                                                                                        | 15,16,17,18 |
| <b>Other information</b> |     |                                                                                                                                                                                                              |             |
| Funding                  | 22  | Give the source of funding and the role of the funders for the present study and, if applicable, for the original study on which the present article is based                                                | N/A         |

\*Give information separately for cases and controls in case-control studies and, if applicable, for exposed and unexposed groups in cohort and cross-sectional studies.

**Note:** An Explanation and Elaboration article discusses each checklist item and gives methodological background and published examples of transparent reporting. The STROBE checklist is best used in conjunction with this article (freely available on the Web sites of PLoS Medicine at <http://www.plosmedicine.org/>, Annals of Internal Medicine at <http://www.annals.org/>, and Epidemiology at <http://www.epidem.com/>). Information on the STROBE Initiative is available at [www.strobe-statement.org](http://www.strobe-statement.org).
